# Supplementary material for: Phosphine-catalyzed [3+2] annulation of α-substituted allenoates with ester-activated α,β-unsaturated imines: a novel variation of the Lu [3+2] cycloaddition reaction
Source: Royal Society of Chemistry journal article supplement (doi:10.1039/c3cc38264h), 2013-01-01

## Supplementary Information

# Phosphine-Catalyzed [3 + 2] Annulation of $\alpha$ -Substituted Allenates with Ester-Activated $\alpha,\beta$ -Unsaturated Imines: A Novel Variation of the Lu [3 + 2] Cycloaddition Reaction

Junjun Tian and Zhengjie He\*

The State Key Laboratory of Elemento-Organic Chemistry and Department of  
Chemistry, Nankai University, 94 Weijin Road, Tianjin 300071, P. R. China

## Table of Contents

|                                                                                                                  |     |
|------------------------------------------------------------------------------------------------------------------|-----|
| I. General Information .....                                                                                     | S2  |
| II. Analytical Data for Compounds <b>3</b> .....                                                                 | S3  |
| III. Crystal Data and ORTEP Drawings for ( <i>trans, E</i> )- <b>3a</b> and ( <i>trans, Z</i> )- <b>3a</b> ..... | S13 |
| IV. NMR Signals of ( <i>trans, E</i> )- <b>3a</b> and Deuterium-Labeling Experiment.....                         | S15 |
| V. <sup>1</sup> H and <sup>13</sup> C NMR Spectra for Compounds <b>3</b> .....                                   | S20 |

## I. General Information

Unless otherwise noted, all reactions were carried out in nitrogen atmosphere under anhydrous conditions. All the solvents were purified according to the standard procedures.  $^1\text{H}$  and  $^{13}\text{C}$  NMR spectra were recorded on a Bruker AV 400 in  $\text{CDCl}_3$  with tetramethylsilane (TMS) as the internal standard. Melting points were measured on a RY-I apparatus and uncorrected. High resolution ESI mass spectra were acquired with Varian 7.0T FTMS instrument. X-ray crystal diffraction data were collected on a Nonius Kappa CCD diffractometer with Mo  $K\alpha$  radiation ( $\lambda = 0.7107 \text{ \AA}$ ) at room temperature. Column chromatography was performed on silica gel (200-300 mesh) using a mixture of petroleum ether/ethyl acetate as eluant. The unsaturated imines were prepared according the literature procedure from ketones.<sup>1</sup> The  $\alpha$ -substituted allenates were prepared according to the reported procedures.<sup>2</sup>

### General procedure for the phosphine-catalyzed [3+2] annulation of $\alpha$ -substituted allenates and $\alpha, \beta$ -unsaturated imines

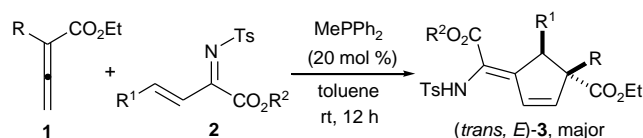

Under  $\text{N}_2$  and at room temperature, a mixture of  $\alpha$ -substituted allenates **1** (0.375 mmol),  $\alpha, \beta$ -unsaturated imines **2** (0.25 mmol), and MePPh<sub>2</sub> (0.05 mmol) in toluene (2.0 mL) was stirred for 12 h. After the reaction completed, the mixture was concentrated on a rotary evaporator under reduced pressure. The residue was purified by flash chromatography on silica gel eluted with a mixture of petroleum ether/ethyl acetate (6:1-4:1) to afford the products **3**.

<sup>1</sup> L.-Q. Lu, J.-J. Zhang, F. Li, Y. Cheng, J. An, J.-R. Chen and W.-J. Xiao, *Angew. Chem., Int. Ed.*, 2010, **49**, 4495.

<sup>2</sup> X.-F. Zhu, J. Lan and O. Kwon, *J. Am. Chem. Soc.*, 2003, **125**, 4716;

## II. Analytical Data for Compounds 3

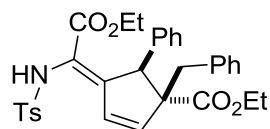

**(trans, E)-3a.** Yield 72%; white solid; mp 133-134 °C;  $^1\text{H}$  NMR (400 MHz,  $\text{CDCl}_3$ )  $\delta$  7.53 (d,  $J = 8.2$  Hz, 2H), 7.45 (br s, 1H), 7.38 – 7.30 (m, 3H), 7.29 – 7.24 (m, 2H), 7.23 – 7.14 (m, 3H), 7.08 (d,  $J = 8.1$  Hz, 2H), 6.98 (dd,  $J = 7.7, 1.4$  Hz, 2H), 6.57 (d,  $J = 5.8$  Hz, 1H), 6.12 (s, 1H), 5.04 (s, 1H), 4.12 – 3.98 (m, 2H), 3.62 (dq,  $J = 10.8, 7.1$  Hz, 1H), 3.49 (dq,  $J = 10.8, 7.1$  Hz, 1H), 2.68 (d,  $J = 13.5$  Hz, 1H), 2.31 (s, 3H), 2.20 (d,  $J = 13.4$  Hz, 1H), 1.10 (t,  $J = 7.1$  Hz, 3H), 0.71 (t,  $J = 7.1$  Hz, 3H).  $^{13}\text{C}$  NMR (101 MHz,  $\text{CDCl}_3$ )  $\delta$  174.70, 163.84, 163.20, 146.84, 143.58, 140.41, 137.19, 135.96, 134.23, 131.62, 129.69, 129.22, 128.13, 127.98, 127.56, 126.79, 126.61, 115.55, 64.96, 61.21, 60.82, 56.20, 42.06, 21.40, 13.88, 13.61; MALDI-MS: Calcd for  $\text{C}_{32}\text{H}_{33}\text{NO}_6\text{S}$  [ $\text{M} + \text{Na}$ ] $^+$ :  $m/z$  582.1921, found: 582.1922.

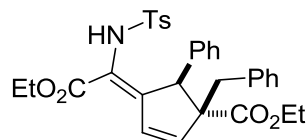

**(trans, Z)-3a.** Yield 16%; white solid; mp 138-140 °C;  $^1\text{H}$  NMR (400 MHz,  $\text{CDCl}_3$ )  $\delta$  7.61 (d,  $J = 8.2$  Hz, 2H), 7.45 (d,  $J = 5.9$  Hz, 1H), 7.40 (br s, 1H), 7.32 – 7.23 (m, 5H), 7.22 – 7.15 (m, 3H), 6.98 – 6.91 (m, 3H), 6.54 (d,  $J = 5.9$  Hz, 1H), 5.37 (s, 1H), 4.74 (s, 1H), 4.18 – 4.04 (m, 2H), 4.04 – 3.94 (m, 1H), 3.90 – 3.81 (m, 1H), 2.53 (d,  $J = 13.3$  Hz, 1H), 2.42 (s, 3H), 2.12 (d,  $J = 13.3$  Hz, 1H), 1.21 (t,  $J = 7.1$  Hz, 3H), 1.09 (t,  $J = 7.1$  Hz, 3H).  $^{13}\text{C}$  NMR (101 MHz,  $\text{CDCl}_3$ )  $\delta$  174.08, 164.30, 162.12, 148.66, 143.70, 137.64, 137.06, 136.95, 131.94, 129.69, 129.40, 128.17, 127.40, 127.27, 126.67, 116.47, 62.73, 61.20, 61.16, 55.89, 42.75, 21.54, 14.02, 13.88; MALDI-MS: Calcd for  $\text{C}_{32}\text{H}_{33}\text{NO}_6\text{S}$  [ $\text{M} + \text{Na}$ ] $^+$ :  $m/z$  582.1921; found: 582.1917.

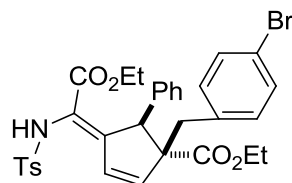

**(trans, E)-3b.** In 78% yield; yellow semi-solid;  $^1\text{H}$  NMR (400 MHz,  $\text{CDCl}_3$ )  $\delta$  7.52 (d,  $J = 8.3$  Hz, 2H), 7.43 (br s, 1H), 7.37 – 7.30 (m, 5H), 7.30 – 7.24 (m, 2H), 7.08 (d,  $J = 8.1$  Hz, 2H), 6.85 (d,  $J = 8.4$  Hz, 2H), 6.49 (d,  $J = 5.8$  Hz, 1H), 6.22 (s, 1H), 5.04 (s, 1H), 4.12 – 4.01 (m, 2H), 3.67 – 3.56 (m, 1H), 3.54 – 3.43 (m, 1H), 2.64 (d,  $J = 13.5$  Hz, 1H), 2.31 (s, 3H), 2.18 (d,  $J = 13.5$  Hz, 1H), 1.14 (t,  $J = 7.1$  Hz, 3H), 0.70 (t,  $J = 7.1$  Hz, 3H).  $^{13}\text{C}$  NMR (101 MHz,  $\text{CDCl}_3$ )  $\delta$  174.36, 163.37, 163.06, 146.00, 143.52, 140.14, 136.21, 135.93, 134.59, 131.35, 131.14, 129.16, 127.97, 127.46, 126.83, 120.55, 115.73, 64.65, 61.32, 60.78, 56.05, 41.19, 21.33, 13.89, 13.52; MALDI-MS: Calcd for  $\text{C}_{32}\text{H}_{32}\text{BrNO}_6\text{S}$  [ $\text{M} + \text{Na}$ ] $^+$ :  $m/z$  660.1026, found: 660.1023. **(trans, Z)-3b** (minor):  $^1\text{H}$  NMR (400 MHz,  $\text{CDCl}_3$ )  $\delta$  7.60 (d,  $J = 8.3$  Hz, 2H), 7.48 (d,  $J = 5.9$  Hz, 1H), 7.44 – 7.37 (m, 2H), 7.35 – 7.28 (m, 4H), 7.24 (s, 2H), 6.91 (br s, 1H), 6.82 (d,  $J = 8.4$  Hz, 2H), 6.48 (d,  $J = 5.9$  Hz, 1H), 5.39 (s, 1H), 4.81 (s, 1H), 4.20 – 4.05 (m, 2H), 4.03 – 3.93 (m, 1H), 3.89 – 3.78 (m, 1H), 2.51 (d,  $J = 13.4$  Hz, 1H), 2.41 (s, 3H), 2.08 (d,  $J = 13.4$  Hz, 1H), 1.24 (t,  $J = 7.1$  Hz, 3H), 1.07 (t,  $J = 7.1$  Hz, 3H).

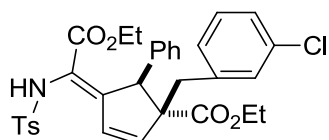

**(trans, E)-3c.** In 74% yield; white solid; mp 127-129 °C;  $^1\text{H}$  NMR (400 MHz,  $\text{CDCl}_3$ )  $\delta$  7.52 (d,  $J = 8.3$  Hz, 2H), 7.43 (br s, 1H), 7.38 – 7.31 (m, 3H), 7.30 – 7.23 (m, 2H), 7.18 – 7.11 (m, 2H), 7.08 (d,  $J = 8.1$  Hz, 2H), 6.95 (s, 1H), 6.89 – 6.83 (m, 1H), 6.51 (d,  $J = 5.8$  Hz, 1H), 6.24 (s, 1H), 5.06 (s, 1H), 4.18 – 4.00 (m, 2H), 3.69 – 3.57 (m, 1H), 3.55 – 3.44 (m, 1H), 2.66 (d,  $J = 13.5$  Hz, 1H), 2.31 (s, 3H), 2.21 (d,  $J = 13.5$  Hz, 1H), 1.14 (t,  $J = 7.1$  Hz, 3H), 0.71 (t,  $J = 7.1$  Hz, 3H).  $^{13}\text{C}$  NMR (101 MHz,  $\text{CDCl}_3$ )  $\delta$  174.35, 163.31, 163.06, 145.94, 143.51, 140.10, 139.22, 135.91, 134.56, 133.82, 131.50, 129.69, 129.29, 129.15, 127.97, 127.79, 127.45, 126.85, 126.73, 115.76, 64.67, 61.37, 60.78, 56.00, 41.45, 21.32, 13.86, 13.51; MALDI-MS: Calcd for  $\text{C}_{32}\text{H}_{32}\text{ClNO}_6\text{S}$  [ $\text{M} + \text{Na}$ ] $^+$ :  $m/z$  616.1531, found: 616.1533. **(trans, Z)-3c** (minor):  $^1\text{H}$  NMR (400 MHz,  $\text{CDCl}_3$ ):  $\delta$  7.61 (d,  $J = 8.3$  Hz, 2H), 7.48 (d,  $J = 5.8$  Hz, 1H), 7.37 (br s, 2H), 7.31 – 7.23 (m, 5H), 7.17 – 7.12 (m, 2H), 6.93 (s, 1H), 6.83 (dt,  $J = 6.6, 1.6$  Hz, 1H), 6.50 (d,  $J = 5.9$  Hz, 1H), 5.39 (s, 1H), 4.79 (s, 1H), 4.22 – 4.06 (m, 2H), 4.04 – 3.94 (m, 1H), 3.90 – 3.80 (m, 1H), 2.52 (d,  $J = 13.4$  Hz, 1H), 2.42 (s, 3H), 2.11 (d,  $J = 13.4$  Hz, 1H), 1.24 (t,  $J = 7.1$  Hz, 3H), 1.08 (t,  $J = 7.1$  Hz, 3H).

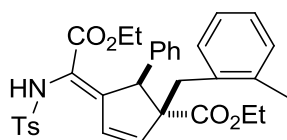

**(trans, E)-3d.** In 75% yield; yellow semi-solid;  $^1\text{H}$  NMR (400 MHz,  $\text{CDCl}_3$ )  $\delta$  7.52 (d,  $J = 8.2$  Hz, 2H), 7.44 (br s, 1H), 7.38 – 7.23 (m, 5H), 7.09 – 7.01 (m, 5H), 6.97 (d,  $J = 6.2$  Hz, 1H), 6.42 (d,  $J = 5.8$  Hz, 1H), 6.24 (s, 1H), 5.12 (s, 1H), 4.14 – 4.03 (m, 2H), 3.69 – 3.58 (m, 1H), 3.56 – 3.45 (m, 1H), 2.64 (d,  $J = 14.2$  Hz, 1H), 2.38 (d,  $J = 14.2$  Hz, 1H), 2.30 (s, 3H), 2.06 (s, 3H), 1.12 (t,  $J = 7.1$  Hz, 3H), 0.72 (t,  $J = 7.1$  Hz, 3H).  $^{13}\text{C}$  NMR (101 MHz,  $\text{CDCl}_3$ )  $\delta$  175.04, 163.60, 163.17, 147.00, 143.44, 140.58, 136.56, 135.91, 135.73, 134.13, 131.36, 130.27, 129.36, 129.11, 127.86, 127.46, 126.72, 126.50, 125.54, 115.47, 64.97, 61.28, 60.73, 56.29, 37.81, 21.29, 19.84, 13.78, 13.52; MALDI-MS: Calcd for  $\text{C}_{33}\text{H}_{35}\text{NO}_6\text{S}$  [ $\text{M} + \text{Na}$ ] $^+$   $m/z$  596.2077, found: 596.2073. **(trans, Z)-3d** (minor):  $^1\text{H}$  NMR (400 MHz,  $\text{CDCl}_3$ )  $\delta$  7.62 (d,  $J = 8.2$  Hz, 2H), 7.46 – 7.37 (m, 3H), 7.31 – 7.26 (m, 3H), 7.25 (s, 1H), 7.08 – 7.02 (m, 3H), 6.97 – 6.90 (m, 2H), 6.41 (d,  $J = 5.8$  Hz, 1H), 5.38 (s, 1H), 4.79 (s, 1H), 4.23 – 4.08 (m, 2H), 4.04 – 3.94 (m, 1H), 3.90 – 3.81 (m, 1H), 2.50 (d,  $J = 14.0$  Hz, 1H), 2.42 (s, 3H), 2.29 (d,  $J = 13.8$  Hz, 1H), 2.05 (s, 3H), 1.23 (t,  $J = 7.2$  Hz, 3H), 1.08 (t,  $J = 7.1$  Hz, 3H).

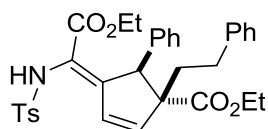

**(trans, E)-3e.** In 74% yield; yellow oil;  $^1\text{H}$  NMR (400 MHz,  $\text{CDCl}_3$ )  $\delta$  7.41 (d,  $J = 8.3$  Hz, 2H), 7.35 – 7.23 (m, 6H), 7.16 – 7.06 (m, 3H), 7.01 (d,  $J = 8.1$  Hz, 2H), 6.70 (d,  $J = 6.9$  Hz, 2H), 6.58 (d,  $J = 5.6$  Hz, 1H), 6.16 (s, 1H), 5.26 (s, 1H), 4.30 – 4.14 (m, 2H), 3.71 – 3.60 (m, 1H), 3.58 – 3.47 (m, 1H), 2.45 – 2.30 (m, 2H), 2.28 (s, 3H), 1.83 – 1.61 (m, 2H), 1.31 (t,  $J = 7.1$  Hz, 3H), 0.76 (d,  $J = 7.1$  Hz, 3H).  $^{13}\text{C}$  NMR (101 MHz,  $\text{CDCl}_3$ )  $\delta$  173.91, 164.04, 163.09, 147.55, 143.42, 141.28, 139.83, 135.68, 134.73, 129.09, 128.15, 128.01, 127.77, 127.50, 126.82, 125.76, 115.65, 64.44, 61.38, 60.75, 54.42, 36.02, 31.74, 21.31, 14.20, 13.61; MALDI-MS: Calcd for  $\text{C}_{33}\text{H}_{35}\text{NO}_6\text{S}$  [ $\text{M} + \text{Na}$ ] $^+$   $m/z$  596.2077, found:

596.2070. (*trans*, *Z*)-**3e** (minor):  $^1\text{H}$  NMR (400 MHz,  $\text{CDCl}_3$ )  $\delta$  7.64 (d,  $J = 8.2$  Hz, 2H), 7.43 (d,  $J = 5.8$  Hz, 1H), 7.32 – 7.22 (m, 6H), 7.16 – 7.08 (m, 4H), 6.74 (d,  $J = 6.9$  Hz, 2H), 6.66 (d,  $J = 5.8$  Hz, 1H), 5.37 (s, 1H), 5.01 (s, 1H), 4.34 – 4.18 (m, 2H), 4.00 – 3.91 (m, 1H), 3.87 – 3.76 (m, 1H), 2.42 (s, 3H), 2.38 – 2.16 (m, 3H), 1.58 – 1.54 (m, 1H), 1.36 (t,  $J = 7.1$  Hz, 3H), 1.06 (t,  $J = 7.1$  Hz, 3H).

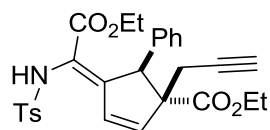

(*trans*, *E*)-**3f**. In 55% yield; white solid; mp 162-163 °C;  $^1\text{H}$  NMR (400 MHz,  $\text{CDCl}_3$ )  $\delta$  7.50 (d,  $J = 8.2$  Hz, 2H), 7.37 (d,  $J = 5.7$  Hz, 1H), 7.31 (t,  $J = 7.2$  Hz, 2H), 7.28 – 7.23 (m, 2H), 7.15 (br s, 1H), 7.07 (d,  $J = 8.2$  Hz, 2H), 6.70 (d,  $J = 5.7$  Hz, 1H), 6.13 (s, 1H), 5.00 (s, 1H), 4.33 – 4.17 (m, 2H), 3.67 – 3.58 (m, 1H), 3.53 – 3.44 (m, 1H), 2.31 (s, 3H), 2.25 – 2.15 (m, 1H), 2.06 – 1.93 (m, 2H), 1.31 (t,  $J = 7.1$  Hz, 3H), 0.71 (t,  $J = 7.1$  Hz, 3H).  $^{13}\text{C}$  NMR (101 MHz,  $\text{CDCl}_3$ )  $\delta$  173.27, 163.26, 163.08, 146.09, 143.61, 139.65, 135.85, 135.64, 129.23, 128.07, 127.55, 127.09, 115.98, 80.18, 71.11, 63.56, 61.76, 60.89, 54.89, 24.53, 21.40, 14.15, 13.60; MALDI-MS: Calcd for  $\text{C}_{28}\text{H}_{29}\text{NO}_6\text{S}$  [ $\text{M} + \text{Na}$ ] $^+$   $m/z$  530.1608, found: 530.1612. (*trans*, *Z*)-**3f** (minor):  $^1\text{H}$  NMR (400 MHz,  $\text{CDCl}_3$ )  $\delta$  7.61 (d,  $J = 8.2$  Hz, 2H), 7.52 (d,  $J = 5.9$  Hz, 1H), 7.37 – 7.22 (m, 7H), 6.80 (d,  $J = 5.8$  Hz, 1H), 5.40 (s, 1H), 4.85 (s, 1H), 4.34 – 4.22 (m, 2H), 4.01 – 3.90 (m, 1H), 3.86 – 3.74 (m, 1H), 2.41 (s, 3H), 2.15 (dd,  $J = 16.6, 2.5$  Hz, 1H), 1.97 (t,  $J = 2.5$  Hz, 1H), 1.76 (dd,  $J = 16.6, 2.5$  Hz, 1H), 1.35 (t,  $J = 7.1$  Hz, 3H), 1.06 (t,  $J = 7.1$  Hz, 3H).

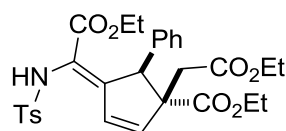

(*trans*, *E*)-**3g**. In 65% yield; yellow oil;  $^1\text{H}$  NMR (400 MHz,  $\text{CDCl}_3$ )  $\delta$  7.46 (d,  $J = 8.3$  Hz, 2H), 7.37 (d,  $J = 5.6$  Hz, 1H), 7.34 – 7.15 (m, 5H), 7.04 (d,  $J = 8.1$  Hz, 2H), 6.50 (d,  $J = 5.6$  Hz, 1H), 6.22 (s, 1H), 5.23 (s, 1H), 4.29 – 4.11 (m, 2H), 3.97 (q,  $J = 7.1$  Hz, 2H), 3.72 – 3.60 (m, 1H), 3.59 – 3.47 (m, 1H), 2.65 (d,  $J = 17.4$  Hz, 1H), 2.27 (d,  $J = 19.8$  Hz, 4H), 1.25 (t,  $J = 7.1$  Hz, 3H), 1.13 (t,  $J = 7.1$  Hz, 3H), 0.74 (t,  $J = 7.1$  Hz, 3H).  $^{13}\text{C}$  NMR (101 MHz,  $\text{CDCl}_3$ )  $\delta$  172.92, 170.84, 163.47, 163.09, 145.92, 143.43, 139.98, 136.24, 135.63, 131.66, 129.08, 128.22, 127.49, 126.93, 116.07, 62.15, 61.58, 60.81, 60.43, 54.49, 37.91, 21.28, 13.92, 13.89, 13.57; MALDI-MS: Calcd for  $\text{C}_{29}\text{H}_{33}\text{NO}_8\text{S}$  [ $\text{M} + \text{Na}$ ] $^+$   $m/z$  578.1819, found: 578.1812. (*trans*, *Z*)-**3g** (minor):  $^1\text{H}$  NMR (400 MHz,  $\text{CDCl}_3$ )  $\delta$  7.65 (d,  $J = 8.3$  Hz, 2H), 7.51 (d,  $J = 5.7$  Hz, 1H), 7.34 – 7.21 (m, 6H), 6.79 (br s, 1H), 6.71 (d,  $J = 5.7$  Hz, 1H), 5.41 (s, 1H), 5.03 (s, 1H), 4.25 (q,  $J = 7.1$  Hz, 2H), 4.01 – 3.89 (m, 3H), 3.85 – 3.73 (m, 1H), 2.41 (s, 3H), 2.34 (d,  $J = 17.1$  Hz, 1H), 2.23 (d,  $J = 17.1$  Hz, 1H), 1.32 (t,  $J = 7.1$  Hz, 3H), 1.13 (t,  $J = 7.2$  Hz, 3H), 1.05 (t,  $J = 7.1$  Hz, 3H).

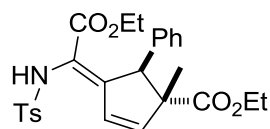

(*trans*, *E*)-**3h**. In 68% yield; white solid; mp 85-87 °C;  $^1\text{H}$  NMR (400 MHz,  $\text{CDCl}_3$ )  $\delta$  7.54 (d,  $J = 8.3$  Hz, 2H), 7.33 – 7.18 (m, 6H), 7.09 (d,  $J = 8.1$  Hz, 2H), 6.47 (d,  $J = 5.6$  Hz, 1H), 6.19 (s, 1H), 5.12 (s, 1H), 4.24 – 4.13 (m, 2H), 3.63 – 3.46 (m, 2H), 2.31 (s, 3H), 1.28 (t,  $J = 7.1$  Hz, 3H), 0.93 (s, 3H), 0.71 (t,  $J = 7.1$  Hz, 3H).  $^{13}\text{C}$  NMR (101 MHz,  $\text{CDCl}_3$ )  $\delta$  174.98, 164.16, 163.29, 148.75, 143.49, 141.12, 135.85, 134.00, 129.14, 127.85, 127.53, 126.47, 115.79, 61.38, 60.73, 60.37, 54.72, 21.34, 20.92, 14.04,

13.54; MALDI-MS: Calcd for  $C_{26}H_{29}NO_6S$   $[M + Na]^+$   $m/z$  506.1608, found: 506.1606.

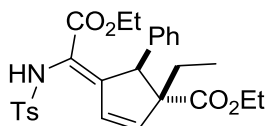

(*trans, E*)-**3i**. In 53% yield; white solid; mp 76-78 °C;  $^1H$  NMR (400 MHz,  $CDCl_3$ )  $\delta$  7.46 (d,  $J$  = 8.2 Hz, 2H), 7.35 – 7.27 (m, 4H), 7.27 – 7.21 (m, 2H), 7.05 (d,  $J$  = 8.1 Hz, 2H), 6.66 (d,  $J$  = 5.7 Hz, 1H), 6.15 (s, 1H), 5.06 (s, 1H), 4.27 – 4.11 (m, 2H), 3.67 – 3.57 (m, 1H), 3.55 – 3.44 (m, 1H), 2.30 (s, 3H), 1.44 – 1.34 (m, 1H), 1.29 (t,  $J$  = 7.1 Hz, 3H), 1.26 – 1.18 (m, 1H), 0.78 – 0.69 (m, 6H).  $^{13}C$  NMR (101 MHz,  $CDCl_3$ )  $\delta$  174.56, 164.19, 163.18, 147.32, 143.44, 140.32, 135.80, 134.46, 129.12, 127.64, 127.50, 126.55, 115.40, 64.86, 61.19, 60.72, 55.08, 27.78, 21.34, 14.16, 13.58, 9.85; MALDI-MS: Calcd for  $C_{27}H_{31}NO_6S$   $[M + Na]^+$   $m/z$  520.1764, found: 520.1766. (*trans, Z*)-**3i** (minor):  $^1H$  NMR (400 MHz,  $CDCl_3$ )  $\delta$  7.62 (d,  $J$  = 8.2 Hz, 2H), 7.42 (d,  $J$  = 5.8 Hz, 1H), 7.33 – 7.23 (m, 7H), 6.71 (d,  $J$  = 5.8 Hz, 1H), 5.34 (s, 1H), 4.77 (s, 1H), 4.31 – 4.14 (m, 2H), 4.02 – 3.92 (m, 1H), 3.88 – 3.77 (m, 1H), 2.41 (s, 3H), 1.33 (t,  $J$  = 7.1 Hz, 3H), 1.30 – 1.15 (m, 2H), 1.07 (t,  $J$  = 7.1 Hz, 3H), 0.70 (t,  $J$  = 7.4 Hz, 3H).

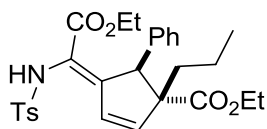

(*trans, E*)-**3j**. In 64% yield; white solid; mp 112-113 °C;  $^1H$  NMR (400 MHz,  $CDCl_3$ )  $\delta$  7.46 (d,  $J$  = 8.0 Hz, 2H), 7.35 – 7.27 (m, 4H), 7.26 – 7.21 (m, 2H), 7.04 (d,  $J$  = 8.0 Hz, 2H), 6.62 (d,  $J$  = 5.6 Hz, 1H), 6.21 (s, 1H), 5.08 (s, 1H), 4.25 – 4.10 (m, 2H), 3.68 – 3.57 (m, 1H), 3.56 – 3.45 (m, 1H), 2.30 (s, 3H), 1.28 (t,  $J$  = 7.0 Hz, 3H), 1.24 – 1.07 (m, 4H), 0.72 (t,  $J$  = 7.1 Hz, 3H), 0.61 (t,  $J$  = 6.9 Hz, 3H).  $^{13}C$  NMR (101 MHz,  $CDCl_3$ )  $\delta$  174.52, 164.06, 163.14, 147.65, 143.35, 140.18, 135.77, 134.29, 129.04, 127.54, 127.45, 126.49, 115.41, 64.40, 61.10, 60.64, 54.98, 36.56, 21.27, 18.72, 14.20, 14.08, 13.52; MALDI-MS: Calcd for  $C_{28}H_{33}NO_6S$   $[M + Na]^+$   $m/z$  534.1921, found: 534.1922. (*trans, Z*)-**3j** (minor):  $^1H$  NMR (400 MHz,  $CDCl_3$ )  $\delta$  7.62 (d,  $J$  = 8.1 Hz, 2H), 7.41 (d,  $J$  = 5.8 Hz, 1H), 7.34 – 7.21 (m, 7H), 6.68 (d,  $J$  = 5.8 Hz, 1H), 5.34 (s, 1H), 4.76 (s, 1H), 4.29 – 4.13 (m, 2H), 4.02 – 3.92 (m, 1H), 3.88 – 3.78 (m, 1H), 2.41 (s, 3H), 1.32 (t,  $J$  = 7.1 Hz, 3H), 1.22 – 1.14 (m, 2H), 1.07 (t,  $J$  = 7.1 Hz, 3H), 1.03 – 0.97 (m, 2H), 0.62 (t,  $J$  = 6.0 Hz, 3H).

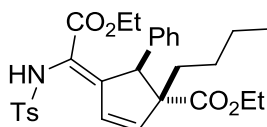

(*trans, E*)-**3k**. In 75% yield; white solid; mp 86-88 °C;  $^1H$  NMR (400 MHz,  $CDCl_3$ )  $\delta$  7.44 (d,  $J$  = 8.2 Hz, 2H), 7.33 – 7.26 (m, 4H), 7.26 – 7.20 (m, 2H), 7.04 (d,  $J$  = 8.1 Hz, 2H), 6.62 (d,  $J$  = 5.7 Hz, 1H), 6.12 (s, 1H), 5.09 (s, 1H), 4.27 – 4.12 (m, 2H), 3.66 – 3.57 (m, 1H), 3.56 – 3.42 (m, 1H), 2.30 (s, 3H), 1.35 – 1.23 (m, 4H), 1.17 – 0.90 (m, 5H), 0.73 (t,  $J$  = 7.1 Hz, 3H), 0.66 (t,  $J$  = 7.0 Hz, 3H).  $^{13}C$  NMR (101 MHz,  $CDCl_3$ )  $\delta$  174.56, 164.25, 163.22, 147.94, 143.45, 140.20, 135.78, 134.38, 129.13, 127.61, 127.55, 126.59, 115.43, 64.44, 61.19, 60.74, 54.95, 34.02, 27.46, 22.76, 21.36, 14.16, 13.63, 13.53; MALDI-MS: Calcd for  $C_{29}H_{35}NO_6S$   $[M + Na]^+$   $m/z$  548.2077, found: 548.2073. (*trans, Z*)-**3k** (minor):  $^1H$  NMR (400 MHz,  $CDCl_3$ )  $\delta$  7.62 (d,  $J$  = 8.3 Hz, 2H), 7.40 (d,  $J$  = 5.8 Hz, 1H), 7.29 – 7.22 (m, 7H), 6.68 (d,  $J$  = 5.8 Hz, 1H), 5.34 (s, 1H), 4.78 (s, 1H), 4.27 – 4.15 (m, 2H), 4.02 – 3.93 (m, 1H), 3.88 – 3.78 (m, 1H), 2.41 (s, 3H), 1.32 (t,  $J$  = 7.1 Hz, 3H), 1.07 (t,  $J$  = 7.1 Hz, 3H), 1.02 – 0.77 (m, 6H), 0.66

(t,  $J = 7.1$  Hz, 3H).

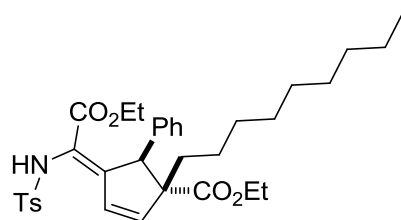

**(trans, E)-3l.** In 68% yield; yellow oil;  $^1\text{H}$  NMR (400 MHz,  $\text{CDCl}_3$ )  $\delta$  7.44 (d,  $J = 8.3$  Hz, 2H), 7.33 – 7.26 (m, 4H), 7.26 – 7.21 (m, 2H), 7.03 (d,  $J = 8.1$  Hz, 2H), 6.62 (d,  $J = 5.7$  Hz, 1H), 6.16 (s, 1H), 5.10 (s, 1H), 4.27 – 4.09 (m, 2H), 3.68 – 3.57 (m, 1H), 3.55 – 3.45 (m, 1H), 2.30 (s, 3H), 1.33 – 1.22 (m, 8H), 1.21 – 1.13 (m, 4H), 1.13 – 0.97 (m, 7H), 0.86 (t,  $J = 7.1$  Hz, 3H), 0.73 (t,  $J = 7.1$  Hz, 3H).  $^{13}\text{C}$  NMR (101 MHz,  $\text{CDCl}_3$ )  $\delta$  174.50, 164.22, 163.18, 147.91, 143.39, 140.17, 135.76, 134.33, 129.08, 127.57, 127.51, 126.55, 115.41, 64.47, 61.14, 60.69, 54.87, 34.30, 31.72, 29.62, 29.20, 29.07, 28.99, 25.28, 22.56, 21.32, 14.13, 14.02, 13.59; MALDI-MS: Calcd for  $\text{C}_{34}\text{H}_{45}\text{NO}_6\text{S}$  [ $\text{M} + \text{Na}$ ] $^+$   $m/z$  618.2860, found: 618.2852.

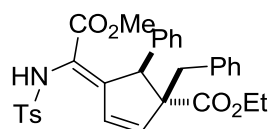

**(trans, E)-3m.** In 66% yield; white solid; mp 170-171 °C;  $^1\text{H}$  NMR (400 MHz,  $\text{CDCl}_3$ )  $\delta$  7.51 (d,  $J = 8.2$  Hz, 2H), 7.44 (br s, 1H), 7.35 (t,  $J = 7.6$  Hz, 2H), 7.30 – 7.23 (m, 3H), 7.23 – 7.14 (m, 3H), 7.08 (d,  $J = 8.1$  Hz, 2H), 6.97 (dd,  $J = 7.6, 1.3$  Hz, 2H), 6.59 (d,  $J = 5.8$  Hz, 1H), 6.09 (s, 1H), 5.04 (s, 1H), 4.11 – 3.97 (m, 2H), 3.04 (s, 3H), 2.67 (d,  $J = 13.5$  Hz, 1H), 2.32 (s, 3H), 2.23 (d,  $J = 13.5$  Hz, 1H), 1.10 (t,  $J = 7.1$  Hz, 3H).  $^{13}\text{C}$  NMR (101 MHz,  $\text{CDCl}_3$ )  $\delta$  174.62, 164.47, 163.50, 147.19, 143.57, 140.22, 137.13, 135.85, 134.06, 131.45, 129.65, 129.17, 128.12, 127.98, 127.49, 126.80, 126.59, 115.27, 64.97, 61.23, 56.17, 51.29, 41.95, 21.41, 13.86; MALDI-MS: Calcd for  $\text{C}_{31}\text{H}_{31}\text{NO}_6\text{S}$  [ $\text{M} + \text{Na}$ ] $^+$   $m/z$  568.1764, found: 568.1770.

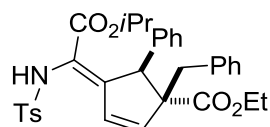

**(trans, E)-3n.** In 70% yield; white solid; mp 70-71 °C;  $^1\text{H}$  NMR (400 MHz,  $\text{CDCl}_3$ )  $\delta$  7.55 (d,  $J = 8.3$  Hz, 2H), 7.47 (br s, 1H), 7.39 – 7.30 (m, 4H), 7.29 – 7.24 (m, 1H), 7.23 – 7.15 (m, 3H), 7.08 (d,  $J = 8.1$  Hz, 2H), 7.02 – 6.95 (m, 2H), 6.54 (d,  $J = 5.8$  Hz, 1H), 6.25 (s, 1H), 5.06 (s, 1H), 4.54 – 4.46 (m, 1H), 4.14 – 3.96 (m, 2H), 2.70 (d,  $J = 13.4$  Hz, 1H), 2.30 (s, 3H), 2.16 (d,  $J = 13.4$  Hz, 1H), 1.11 (t,  $J = 7.1$  Hz, 3H), 0.84 (d,  $J = 6.3$  Hz, 3H), 0.60 (d,  $J = 6.2$  Hz, 3H).  $^{13}\text{C}$  NMR (101 MHz,  $\text{CDCl}_3$ )  $\delta$  174.66, 162.99, 162.89, 146.29, 143.48, 140.46, 137.17, 136.08, 134.34, 131.75, 129.64, 129.20, 128.08, 127.89, 127.55, 126.74, 126.55, 115.88, 68.97, 64.85, 61.11, 56.09, 42.09, 21.31, 21.22, 20.80, 13.84; MALDI-MS: Calcd for  $\text{C}_{33}\text{H}_{35}\text{NO}_6\text{S}$  [ $\text{M} + \text{Na}$ ] $^+$   $m/z$  596.2077, found: 596.2072.

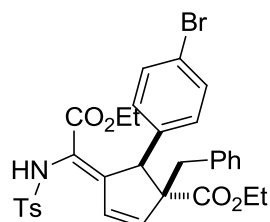

**(trans, E)-3o**. In 69% yield; white solid; mp 141-142 °C;  $^1\text{H}$  NMR (400 MHz,  $\text{CDCl}_3$ )  $\delta$  7.51 (d,  $J$  = 8.3 Hz, 2H), 7.48 (d,  $J$  = 8.5 Hz, 2H), 7.35 (br s, 1H), 7.28 (d,  $J$  = 5.8 Hz, 1H), 7.24 – 7.15 (m, 4H), 7.12 (d,  $J$  = 8.1 Hz, 2H), 6.96 (dd,  $J$  = 7.7, 1.5 Hz, 2H), 6.56 (d,  $J$  = 5.8 Hz, 1H), 6.24 (s, 1H), 5.04 (s, 1H), 4.10 – 3.98 (m, 2H), 3.69 – 3.58 (m, 1H), 3.55 – 3.43 (m, 1H), 2.65 (d,  $J$  = 13.4 Hz, 1H), 2.33 (s, 3H), 2.22 (d,  $J$  = 13.4 Hz, 1H), 1.09 (t,  $J$  = 7.1 Hz, 3H), 0.75 (t,  $J$  = 7.1 Hz, 3H).  $^{13}\text{C}$  NMR (101 MHz,  $\text{CDCl}_3$ )  $\delta$  174.34, 163.33, 162.83, 146.68, 143.64, 139.40, 136.75, 135.99, 134.02, 133.21, 130.98, 129.50, 129.22, 128.10, 127.36, 126.63, 120.54, 115.63, 64.73, 61.24, 60.80, 55.36, 42.08, 21.34, 13.77, 13.56; MALDI-MS: Calcd for  $\text{C}_{32}\text{H}_{32}\text{BrNO}_6\text{S}$  [ $\text{M} + \text{Na}$ ] $^+$   $m/z$  660.1026, found: 660.1032. **(trans, Z)-3o** (minor):  $^1\text{H}$  NMR (400 MHz,  $\text{CDCl}_3$ )  $\delta$  7.59 (d,  $J$  = 8.3 Hz, 2H), 7.48 (d,  $J$  = 5.9 Hz, 1H), 7.38 (br s, 2H), 7.27 – 7.16 (m, 6H), 6.94 (dd,  $J$  = 7.6, 1.6 Hz, 2H), 6.81 (br s, 1H), 6.58 (d,  $J$  = 5.9 Hz, 1H), 5.45 (s, 1H), 5.02 (s, 1H), 4.22 – 4.06 (m, 2H), 3.99 – 3.88 (m, 1H), 3.81 – 3.70 (m, 1H), 2.55 (d,  $J$  = 13.3 Hz, 1H), 2.40 (s, 3H), 2.15 (d,  $J$  = 13.3 Hz, 1H), 1.22 (t,  $J$  = 7.1 Hz, 3H), 1.03 (t,  $J$  = 7.1 Hz, 3H).

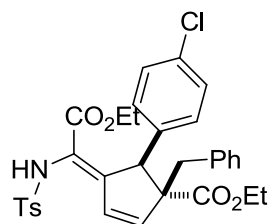

**(trans, E)-3p**. In 60% yield; white solid; mp 138-140 °C;  $^1\text{H}$  NMR (400 MHz,  $\text{CDCl}_3$ )  $\delta$  7.51 (d,  $J$  = 8.3 Hz, 2H), 7.40 (br s, 1H), 7.35 – 7.26 (m, 4H), 7.25 – 7.17 (m, 3H), 7.12 (d,  $J$  = 8.1 Hz, 2H), 6.96 (dd,  $J$  = 7.6, 1.5 Hz, 2H), 6.57 (d,  $J$  = 5.8 Hz, 1H), 6.15 (s, 1H), 5.04 (s, 1H), 4.09 – 3.96 (m, 2H), 3.70 – 3.60 (m, 1H), 3.55 – 3.44 (m, 1H), 2.65 (d,  $J$  = 13.4 Hz, 1H), 2.34 (s, 3H), 2.21 (d,  $J$  = 13.4 Hz, 1H), 1.09 (t,  $J$  = 7.1 Hz, 3H), 0.75 (t,  $J$  = 7.1 Hz, 3H).  $^{13}\text{C}$  NMR (101 MHz,  $\text{CDCl}_3$ )  $\delta$  174.47, 163.53, 162.93, 146.82, 143.76, 138.95, 136.84, 136.02, 134.09, 132.54, 129.58, 129.30, 128.18, 128.11, 127.43, 126.71, 115.64, 64.87, 61.32, 60.89, 55.39, 42.13, 21.41, 13.84, 13.63; MALDI-MS: Calcd for  $\text{C}_{32}\text{H}_{32}\text{ClNO}_6\text{S}$  [ $\text{M} + \text{Na}$ ] $^+$   $m/z$  616.1531, found: 616.1533. **(trans, Z)-3p** (minor):  $^1\text{H}$  NMR (400 MHz,  $\text{CDCl}_3$ )  $\delta$  7.60 (d,  $J$  = 8.3 Hz, 2H), 7.48 (d,  $J$  = 5.9 Hz, 1H), 7.39 (s, 2H), 7.26 – 7.17 (m, 6H), 6.94 (dd,  $J$  = 7.6, 1.7 Hz, 2H), 6.87 (br s, 1H), 6.58 (d,  $J$  = 5.9 Hz, 1H), 5.45 (s, 1H), 5.03 (s, 1H), 4.22 – 4.07 (m, 2H), 3.99 – 3.90 (m, 1H), 3.81 – 3.71 (m, 1H), 2.56 (d,  $J$  = 13.3 Hz, 1H), 2.40 (s, 3H), 2.15 (d,  $J$  = 13.3 Hz, 1H), 1.22 (t,  $J$  = 7.1 Hz, 3H), 1.03 (t,  $J$  = 7.1 Hz, 3H).

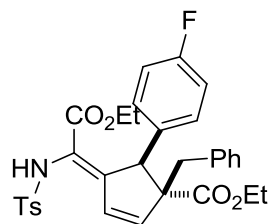

**(trans, E)-3q**. In 49% yield; yellow semi-solid;  $^1\text{H}$  NMR (400 MHz,  $\text{CDCl}_3$ )  $\delta$  7.52 (d,  $J$  = 8.1 Hz, 2H), 7.42 (br s, 1H), 7.33 – 7.26 (m, 2H), 7.24 – 7.16 (m, 3H), 7.11 (d,  $J$  = 8.2 Hz, 2H), 7.04 (t,  $J$  = 8.4 Hz, 2H), 6.97 (d,  $J$  = 6.9 Hz, 2H), 6.56 (d,  $J$  = 5.8 Hz, 1H), 6.28 (s, 1H), 5.07 (s, 1H), 4.13 – 3.96 (m, 2H), 3.70 – 3.58 (m, 1H), 3.56 – 3.43 (m, 1H), 2.66 (d,  $J$  = 13.4 Hz, 1H), 2.32 (s, 3H), 2.21 (d,  $J$  = 13.5 Hz, 1H), 1.09 (t,  $J$  = 7.1 Hz, 3H), 0.74 (t,  $J$  = 7.1 Hz, 3H).  $^{13}\text{C}$  NMR (101 MHz,  $\text{CDCl}_3$ )  $\delta$  174.43, 163.68, 162.91, 161.56 (d,  $J$  = 245.3 Hz), 146.62, 143.56, 136.87, 136.19 (d,  $J$  = 3.1 Hz), 136.03, 134.00, 133.01, 129.49, 129.15, 128.07, 127.35, 126.57, 115.57, 114.65 (d,  $J$  = 21.4 Hz), 64.82, 61.17, 60.73, 55.17, 42.03, 21.27, 13.75, 13.52; MALDI-MS: Calcd for  $\text{C}_{32}\text{H}_{32}\text{FNO}_6\text{S}$  [ $\text{M} + \text{Na}$ ] $^+$   $m/z$  600.1827,



found: 600.1825.

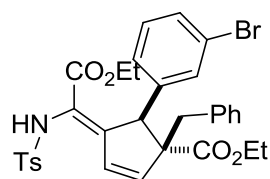

**(trans, E)-3r.** In 70% yield; white solid; mp 144-146 °C;  $^1\text{H}$  NMR (400 MHz,  $\text{CDCl}_3$ )  $\delta$  7.66 (d,  $J$  = 6.8 Hz, 1H), 7.57 (br s, 1H), 7.50 (d,  $J$  = 5.6 Hz, 1H), 7.42 (d,  $J$  = 8.7 Hz, 2H), 7.30 (d,  $J$  = 4.6 Hz, 1H), 7.26 – 7.07 (m, 6H), 6.99 (br s, 2H), 6.57 (d,  $J$  = 5.7 Hz, 1H), 6.18 (br s, 1H), 5.01 (s, 1H), 4.10 – 3.96 (m, 2H), 3.71 – 3.61 (m, 1H), 3.60 – 3.42 (br, 1H), 2.67 (d,  $J$  = 13.3 Hz, 1H), 2.33 (s, 3H), 2.30 – 2.15 (br, 1H), 1.09 (t,  $J$  = 6.2 Hz, 3H), 0.82 – 0.64 (br, 3H).  $^{13}\text{C}$  NMR (101 MHz,  $\text{CDCl}_3$ )  $\delta$  203.04, 174.41, 163.21, 162.79, 146.69, 143.65, 143.02, 136.76, 136.09, 134.40, 134.10, 130.09, 129.91, 129.62, 129.50, 129.28, 128.17, 127.56, 126.73, 126.01, 122.34, 115.87, 64.87, 61.33, 60.83, 55.67, 42.42, 21.40, 13.83, 13.57; MALDI-MS: Calcd for  $\text{C}_{32}\text{H}_{32}\text{BrNO}_6\text{S}$  [ $\text{M} + \text{Na}$ ] $^+$   $m/z$  660.1026, found: 660.1021.

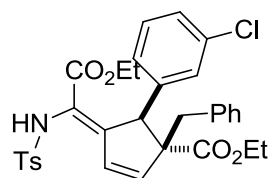

**(trans, E)-3s.** In 67% yield; white solid; mp 138-139 °C;  $^1\text{H}$  NMR (400 MHz,  $\text{CDCl}_3$ )  $\delta$  7.65 (d,  $J$  = 5.6 Hz, 1H), 7.51 (br s, 1H), 7.40 (d,  $J$  = 16.5 Hz, 1H), 7.33 – 7.23 (m, 4H), 7.23 – 7.07 (m, 5H), 6.99 (br s, 2H), 6.57 (d,  $J$  = 5.8 Hz, 1H), 6.15 (s, 1H), 5.02 (br s, 1H), 4.11 – 3.97 (m, 2H), 3.73 – 3.61 (m, 1H), 3.50 (br s, 1H), 2.68 (d,  $J$  = 13.4 Hz, 1H), 2.33 (s, 3H), 2.30 – 2.14 (br, 1H), 1.10 (t,  $J$  = 7.0 Hz, 3H), 0.81 – 0.66 (br, 3H).  $^{13}\text{C}$  NMR (101 MHz,  $\text{CDCl}_3$ )  $\delta$  174.44, 163.22, 162.87, 146.72, 143.69, 142.78, 136.80, 136.04, 134.12, 131.55, 129.65, 129.28, 129.21, 128.19, 127.55, 127.30, 126.98, 126.75, 125.58, 115.86, 64.87, 61.34, 60.86, 55.67, 42.41, 21.42, 13.85, 13.59; MALDI-MS: Calcd for  $\text{C}_{32}\text{H}_{32}\text{ClNO}_6\text{S}$  [ $\text{M} + \text{Na}$ ] $^+$   $m/z$  616.1531, found: 616.1530.

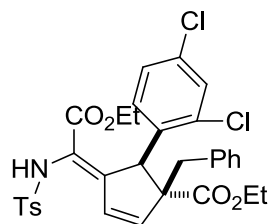

**(trans, E)-3t.** In 53% yield; white solid; mp 143-145 °C;  $^1\text{H}$  NMR (400 MHz,  $\text{CDCl}_3$ )  $\delta$  7.50 (d,  $J$  = 8.3 Hz, 2H), 7.46 (d,  $J$  = 1.8 Hz, 1H), 7.34 (d,  $J$  = 5.8 Hz, 1H), 7.30 – 7.27 (m, 2H), 7.25 – 7.16 (m, 3H), 7.11 (d,  $J$  = 8.1 Hz, 2H), 7.02 (dd,  $J$  = 7.7, 1.4 Hz, 2H), 6.57 (d,  $J$  = 5.8 Hz, 1H), 6.20 (s, 1H), 5.48 (s, 1H), 4.09 – 4.00 (m, 2H), 3.85 – 3.74 (m, 1H), 3.63 – 3.52 (m, 1H), 2.87 (d,  $J$  = 13.2 Hz, 1H), 2.33 (s, 3H), 2.17 (d,  $J$  = 13.2 Hz, 1H), 1.12 (t,  $J$  = 7.1 Hz, 3H), 0.72 (t,  $J$  = 7.1 Hz, 3H).  $^{13}\text{C}$  NMR (101 MHz,  $\text{CDCl}_3$ )  $\delta$  173.60, 163.20, 162.94, 147.08, 143.81, 137.81, 136.68, 136.07, 135.95, 134.42, 133.16, 130.49, 129.90, 129.32, 129.10, 128.18, 127.38, 126.92, 126.76, 115.95, 65.21, 61.37, 61.22, 51.91, 40.13, 21.39, 13.83, 13.67; MALDI-MS: Calcd for  $\text{C}_{32}\text{H}_{31}\text{Cl}_2\text{NO}_6\text{S}$  [ $\text{M} + \text{Na}$ ] $^+$   $m/z$  650.1141, found: 650.1137.

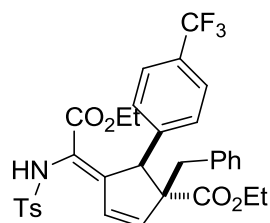

(*trans, E*)-**3u**. In 52% yield; yellow semi-solid;  $^1\text{H}$  NMR (400 MHz,  $\text{CDCl}_3$ )  $\delta$  7.66 – 7.54 (m, 3H), 7.49 (d,  $J = 8.3$  Hz, 2H), 7.42 (br s, 1H), 7.31 (d,  $J = 5.7$  Hz, 1H), 7.24 – 7.17 (m, 3H), 7.08 (d,  $J = 8.1$  Hz, 2H), 6.95 (dd,  $J = 7.5, 1.7$  Hz, 2H), 6.60 (d,  $J = 5.8$  Hz, 1H), 6.16 (s, 1H), 5.13 (s, 1H), 4.15 – 3.99 (m, 2H), 3.69 – 3.58 (m, 1H), 3.54 – 3.36 (m, 1H), 2.63 (d,  $J = 13.4$  Hz, 1H), 2.32 (s, 3H), 2.24 (d,  $J = 13.4$  Hz, 1H), 1.10 (t,  $J = 7.1$  Hz, 3H), 0.71 (t,  $J = 7.1$  Hz, 3H).  $^{13}\text{C}$  NMR (101 MHz,  $\text{CDCl}_3$ )  $\delta$  174.32, 163.21, 162.79, 146.87, 144.51, 143.84, 136.64, 135.94, 134.13, 131.92, 129.53, 129.25, 129.02 (d,  $J = 32.6$  Hz), 128.22, 127.43, 126.78, 124.83, 124.16 (d,  $J = 271.9$  Hz), 115.81, 64.85, 61.43, 60.91, 55.61, 42.17, 21.37, 13.84, 13.56; MALDI-MS: Calcd for  $\text{C}_{33}\text{H}_{32}\text{F}_3\text{NO}_6\text{S}$  [ $\text{M} + \text{Na}$ ] $^+$   $m/z$  650.1795, found: 650.1797.

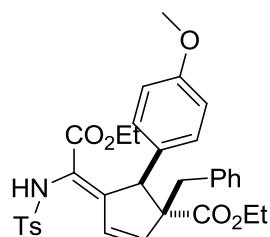

(*trans, E*)-**3v**. In 78% yield; white solid; mp 157-158 °C;  $^1\text{H}$  NMR (400 MHz,  $\text{CDCl}_3$ )  $\delta$  7.53 (d,  $J = 8.2$  Hz, 2H), 7.35 (br s, 1H), 7.29 (d,  $J = 5.8$  Hz, 1H), 7.24 – 7.14 (m, 4H), 7.09 (d,  $J = 8.1$  Hz, 2H), 6.98 (d,  $J = 6.5$  Hz, 2H), 6.89 (d,  $J = 8.8$  Hz, 2H), 6.55 (d,  $J = 5.8$  Hz, 1H), 6.12 (s, 1H), 5.01 (s, 1H), 4.10 – 3.97 (m, 2H), 3.82 (s, 3H), 3.69 – 3.58 (m, 1H), 3.56 – 3.45 (m, 1H), 2.68 (d,  $J = 13.5$  Hz, 1H), 2.32 (s, 3H), 2.21 (d,  $J = 13.5$  Hz, 1H), 1.10 (t,  $J = 7.1$  Hz, 3H), 0.75 (t,  $J = 7.1$  Hz, 3H).  $^{13}\text{C}$  NMR (101 MHz,  $\text{CDCl}_3$ )  $\delta$  174.74, 164.23, 163.19, 158.35, 146.83, 143.56, 137.29, 136.04, 134.15, 132.65, 129.66, 129.23, 128.11, 127.52, 126.56, 115.37, 113.29, 65.09, 61.16, 60.80, 55.50, 55.25, 41.99, 21.41, 13.87, 13.67; MALDI-MS: Calcd for  $\text{C}_{33}\text{H}_{35}\text{NO}_7\text{S}$  [ $\text{M} + \text{Na}$ ] $^+$   $m/z$  612.2026, found: 612.2024.

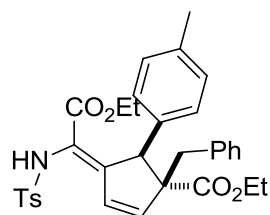

(*trans, E*)-**3w**. In 75% yield; white solid; mp 159-160 °C;  $^1\text{H}$  NMR (400 MHz,  $\text{CDCl}_3$ )  $\delta$  7.53 (d,  $J = 8.3$  Hz, 2H), 7.35 (br s, 1H), 7.29 (d,  $J = 5.8$  Hz, 1H), 7.23 – 7.13 (m, 6H), 7.08 (d,  $J = 8.0$  Hz, 2H), 7.01 – 6.96 (m, 2H), 6.55 (d,  $J = 5.8$  Hz, 1H), 6.17 (s, 1H), 5.01 (s, 1H), 4.09 – 3.98 (m, 2H), 3.66 – 3.57 (m, 1H), 3.56 – 3.45 (m, 1H), 2.68 (d,  $J = 13.5$  Hz, 1H), 2.35 (s, 3H), 2.32 (s, 3H), 2.19 (d,  $J = 13.5$  Hz, 1H), 1.10 (t,  $J = 7.1$  Hz, 3H), 0.74 (t,  $J = 7.1$  Hz, 3H).  $^{13}\text{C}$  NMR (101 MHz,  $\text{CDCl}_3$ )  $\delta$  174.70, 163.95, 163.20, 146.73, 143.46, 137.26, 137.25, 136.19, 136.03, 134.15, 131.32, 129.66, 129.15, 128.58, 128.05, 127.54, 126.51, 115.41, 64.93, 61.10, 60.73, 55.87, 41.96, 21.36, 21.05, 13.83, 13.58; MALDI-MS: Calcd for  $\text{C}_{33}\text{H}_{35}\text{NO}_6\text{S}$  [ $\text{M} + \text{Na}$ ] $^+$   $m/z$  596.2077, found: 596.2072.

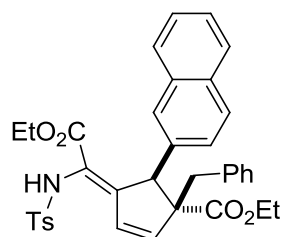

(*trans, E*)-**3x**. In 70% yield; white solid; mp 120-121 °C;  $^1\text{H}$  NMR (400 MHz,  $\text{CDCl}_3$ )  $\delta$  7.95 – 7.75 (m, 4H), 7.65 (d,  $J = 7.9$  Hz, 1H), 7.58 – 7.43 (m, 4H), 7.42 – 7.35 (m, 1H), 7.22 – 7.11 (m, 3H), 6.95 (t,  $J = 6.9$  Hz, 3H), 6.83 (d,  $J = 7.5$  Hz, 1H), 6.62 (t,  $J = 6.3$  Hz, 1H), 6.16 (s, 1H), 5.23 (br s, 1H), 4.16 – 3.98 (m, 2H), 3.61 – 3.50 (m, 1H), 3.50 – 3.36 (br, 1H), 2.71 (d,  $J = 13.4$  Hz, 1H), 2.20 (d,  $J = 11.8$  Hz, 4H), 1.12 (t,  $J = 7.1$  Hz, 3H), 0.72 – 0.58 (m, 3H).  $^{13}\text{C}$  NMR (101 MHz,  $\text{CDCl}_3$ )  $\delta$  174.79, 164.53, 163.68, 163.04, 146.87, 143.49, 139.12, 137.06, 136.09, 134.15, 133.16, 132.32, 130.16, 129.89, 129.66, 129.15, 128.08, 127.81, 127.61, 127.39, 126.59, 126.08, 125.82, 125.64, 115.48, 65.21, 61.26, 60.81, 56.27, 42.24, 21.29, 13.88, 13.56; MALDI-MS: Calcd for  $\text{C}_{36}\text{H}_{35}\text{NO}_6\text{S}$  [ $\text{M} + \text{Na}$ ] $^+$   $m/z$  632.2077, found: 632.2078. (*trans, Z*)-**3x** (minor):  $^1\text{H}$  NMR (400 MHz,  $\text{CDCl}_3$ )  $\delta$  7.94 – 7.78 (m, 3H), 7.73 (d,  $J = 7.8$  Hz, 1H), 7.63 – 7.43 (m, 6H), 7.20 – 7.12 (m, 3H), 7.06 (d,  $J = 8.1$  Hz, 1H), 6.92 (d,  $J = 6.3$  Hz, 2H), 6.66 – 6.55 (m, 1H), 5.36 (s, 1H), 4.99 (br s, 1H), 4.22 – 4.06 (m, 3H), 4.05 – 3.93 (m, 1H), 3.91 – 3.78 (m, 1H), 2.55 (t,  $J = 12.1$  Hz, 1H), 2.41 (s, 3H), 2.23 – 2.09 (m, 1H), 1.23 (t,  $J = 7.1$  Hz, 3H), 1.07 (t,  $J = 7.1$  Hz, 3H).

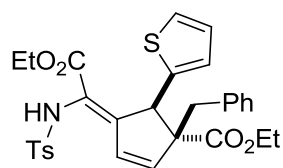

(*trans, E*)-**3y**. In 72% yield; white solid; mp 139-141 °C;  $^1\text{H}$  NMR (400 MHz,  $\text{CDCl}_3$ )  $\delta$  7.53 (d,  $J = 8.3$  Hz, 2H), 7.25 – 7.16 (m, 5H), 7.13 (d,  $J = 8.1$  Hz, 2H), 7.03 – 6.95 (m, 4H), 6.52 (d,  $J = 5.8$  Hz, 1H), 6.19 (s, 1H), 5.38 (s, 1H), 4.08 – 4.00 (m, 2H), 3.74 – 3.55 (m, 2H), 2.93 (d,  $J = 13.6$  Hz, 1H), 2.51 (d,  $J = 13.6$  Hz, 1H), 2.34 (s, 3H), 1.09 (t,  $J = 7.1$  Hz, 3H), 0.82 (t,  $J = 7.1$  Hz, 3H).  $^{13}\text{C}$  NMR (101 MHz,  $\text{CDCl}_3$ )  $\delta$  174.04, 163.27, 162.24, 145.93, 143.55, 142.23, 137.01, 135.94, 133.50, 129.59, 129.22, 128.09, 127.54, 126.62, 126.57, 126.16, 123.75, 115.81, 65.12, 61.26, 60.98, 51.17, 40.47, 21.37, 13.79, 13.65; MALDI-MS: Calcd for  $\text{C}_{30}\text{H}_{31}\text{NO}_6\text{S}_2$  [ $\text{M} + \text{Na}$ ] $^+$   $m/z$  565.1593; found, 565.1486. (*trans, Z*)-**3y** (minor):  $^1\text{H}$  NMR (400 MHz,  $\text{CDCl}_3$ )  $\delta$  7.63 (d,  $J = 8.3$  Hz, 2H), 7.40 (d,  $J = 5.9$  Hz, 1H), 7.28 – 7.15 (m, 6H), 7.02 – 6.94 (m, 4H), 6.51 (d,  $J = 5.9$  Hz, 1H), 5.61 (s, 1H), 5.05 (s, 1H), 4.17 – 4.05 (m, 2H), 4.02 – 3.94 (m, 1H), 3.91 – 3.80 (m, 1H), 2.78 (d,  $J = 13.3$  Hz, 1H), 2.41 (s, 3H), 2.34 (d,  $J = 13.3$  Hz, 1H), 1.21 (t,  $J = 7.1$  Hz, 3H), 1.08 (t,  $J = 7.1$  Hz, 3H).

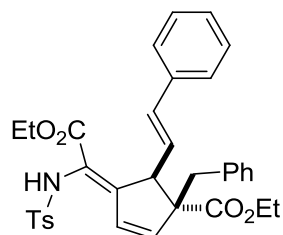

(*trans, E*)-**3z**. In 30% yield; yellow oil;  $^1\text{H}$  NMR (400 MHz,  $\text{CDCl}_3$ )  $\delta$  7.57 (d,  $J = 8.2$  Hz, 2H), 7.39 (d,  $J = 7.2$  Hz, 2H), 7.33 (t,  $J = 7.5$  Hz, 2H), 7.29 – 7.19 (m, 4H), 7.14 (t,  $J = 6.6$  Hz, 3H), 6.94 (d,  $J = 8.1$  Hz, 2H), 6.61 (d,  $J = 15.9$  Hz, 1H), 6.55 (d,  $J = 5.7$  Hz, 1H), 6.17 – 6.07 (m, 2H), 4.80 (d,  $J = 9.2$  Hz,

1H), 4.06 – 3.96 (m, 2H), 3.86 – 3.75 (m, 1H), 3.73 – 3.62 (m, 1H), 3.19 (d,  $J = 13.8$  Hz, 1H), 2.97 (d,  $J = 13.8$  Hz, 1H), 2.25 (s, 3H), 1.07 (t,  $J = 7.1$  Hz, 3H), 0.92 (t,  $J = 7.1$  Hz, 3H).  $^{13}\text{C}$  NMR (101 MHz,  $\text{CDCl}_3$ )  $\delta$  173.94, 163.32, 162.56, 146.43, 143.66, 137.32, 136.92, 135.74, 133.29, 133.17, 129.64, 129.18, 128.61, 128.22, 127.71, 127.56, 127.16, 126.62, 126.15, 115.54, 64.70, 61.21, 60.98, 53.24, 40.33, 21.37, 13.85, 13.84; MALDI-MS: Calcd for  $\text{C}_{34}\text{H}_{35}\text{NO}_6\text{S}$   $[\text{M} + \text{Na}]^+$   $m/z$  608.2077, found: 608.2072.

### III. Crystal Data and ORTEP Drawings for (*trans*, *E*)-3a and (*trans*, *Z*)-3a

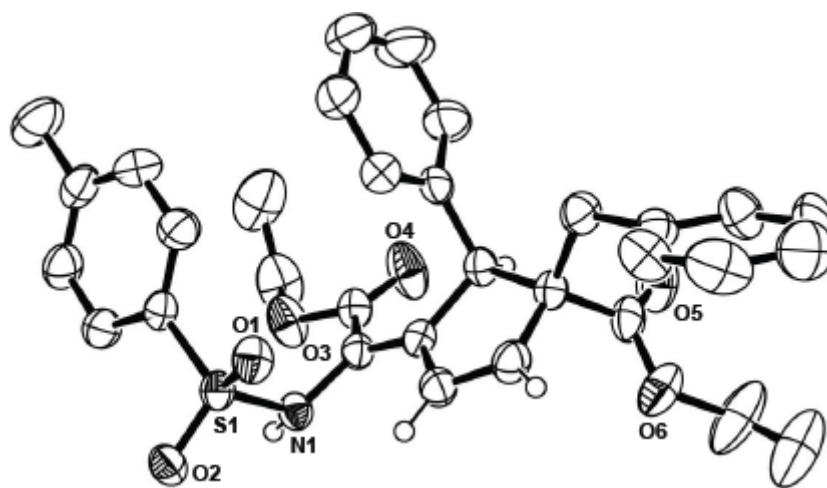

Table 1. Crystal structure data for (*trans*, *E*)-3a.

|                                   |                                                                                                                |
|-----------------------------------|----------------------------------------------------------------------------------------------------------------|
| Identification code               | ( <i>trans</i> , <i>E</i> )-3a                                                                                 |
| Empirical formula                 | C <sub>32</sub> H <sub>33</sub> N O <sub>6</sub> S                                                             |
| Formula weight                    | 559.65                                                                                                         |
| Temperature                       | 293(2) K                                                                                                       |
| Wavelength                        | 0.71073 Å                                                                                                      |
| Crystal system, space group       | Triclinic, P-1                                                                                                 |
| Unit cell dimensions              | a = 8.2167(16) Å    α = 97.25(3)°.<br>b = 8.9290(18) Å    β = 94.20(3)°.<br>c = 21.221(4) Å    γ = 107.69(3)°. |
| Volume                            | 1461.1(5) Å <sup>3</sup>                                                                                       |
| Z, Calcd density                  | 2, 1.272 Mg/m <sup>3</sup>                                                                                     |
| Absorption coefficient            | 0.155 mm <sup>-1</sup>                                                                                         |
| F(000)                            | 592                                                                                                            |
| Crystal size                      | 0.20x 0.18x 0.14 mm <sup>3</sup>                                                                               |
| Theta range for data collection   | 2.69 to 27.92°                                                                                                 |
| Limiting indices                  | -10 ≤ h ≤ 10, -11 ≤ k ≤ 11, -24 ≤ l ≤ 27                                                                       |
| Reflections collected / unique    | 14817 / 6863 [R(int) = 0.0517]                                                                                 |
| Completeness to the θ = 27.92°    | 99.8 %                                                                                                         |
| Absorption correction             | Semi-empirical from equivalents                                                                                |
| Max. and min. transmission        | 0.9786 and 0.9696                                                                                              |
| Refinement method                 | Full-matrix least-squares on F <sup>2</sup>                                                                    |
| Data / restraints / parameters    | 6863 / 7 / 369                                                                                                 |
| Goodness-of-fit on F <sup>2</sup> | 1.015                                                                                                          |
| Final R indices [I > 2σ(I)]       | R1 = 0.0510, wR2 = 0.1222                                                                                      |
| R indices (all data)              | R1 = 0.0845, wR2 = 0.1390                                                                                      |
| Largest diff. peak and hole       | 0.343 and -0.345 e. Å <sup>-3</sup>                                                                            |

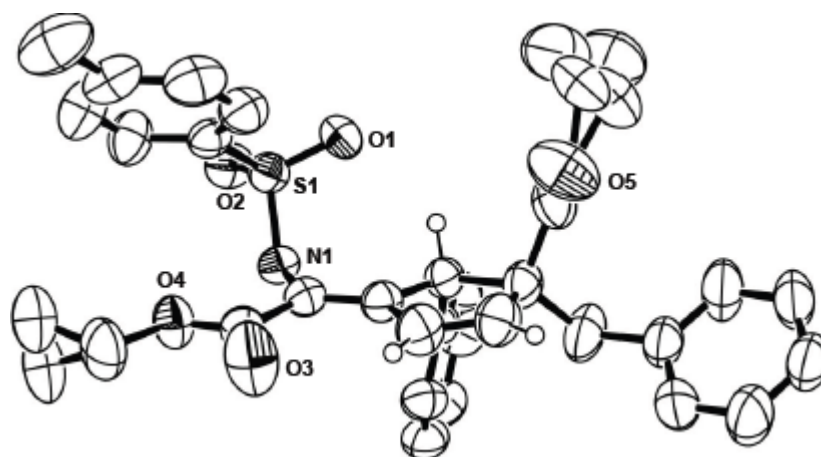

Table 2. Crystal structure data for (*trans, Z*)-**3a**.

|                                   |                                                                                                           |
|-----------------------------------|-----------------------------------------------------------------------------------------------------------|
| Identification code               | ( <i>trans, Z</i> )- <b>3a</b>                                                                            |
| Empirical formula                 | C <sub>32</sub> H <sub>32</sub> N O <sub>6</sub> S                                                        |
| Formula weight                    | 558.65                                                                                                    |
| Temperature                       | 113(2) K                                                                                                  |
| Wavelength                        | 0.71073 Å                                                                                                 |
| Crystal system, space group       | Triclinic, P-1                                                                                            |
| Unit cell dimensions              | a = 9.2454(18) Å    α = 69.90(3)°<br>b = 12.053(2) Å    β = 86.02(3)°<br>c = 14.310(3) Å    γ = 87.63(3)° |
| Volume                            | 1493.7(5) Å <sup>3</sup>                                                                                  |
| Z, Calcd density                  | 2, 1.242 Mg/m <sup>3</sup>                                                                                |
| Absorption coefficient            | 0.152 mm <sup>-1</sup>                                                                                    |
| F(000)                            | 590                                                                                                       |
| Crystal size                      | 0.20x 0.18x 0.12 mm <sup>3</sup>                                                                          |
| Theta range for data collection   | 2.72 to 27.94°                                                                                            |
| Limiting indices                  | -12<=h<=11, -15<=k<=13, -18<=l<=18                                                                        |
| Reflections collected / unique    | 15369 / 7008 [R(int) = 0.0385]                                                                            |
| Completeness to the θ = 27.94°    | 97.8 %                                                                                                    |
| Absorption correction             | Semi-empirical from equivalents                                                                           |
| Max. and min. transmission        | 0.9820 and 0.9703                                                                                         |
| Refinement method                 | Full-matrix least-squares on F <sup>2</sup>                                                               |
| Data / restraints / parameters    | 7008 / 124 / 391                                                                                          |
| Goodness-of-fit on F <sup>2</sup> | 1.042                                                                                                     |
| Final R indices [I>2σ(I)]         | R1 = 0.0564, wR2 = 0.1345                                                                                 |
| R indices (all data)              | R1 = 0.0998, wR2 = 0.1550                                                                                 |
| Largest diff. peak and hole       | 0.441 and -0.275 e. Å <sup>-3</sup>                                                                       |

## IV. NMR Signals of (*trans, E*)-3a and Deuterium-Labeling Experiment

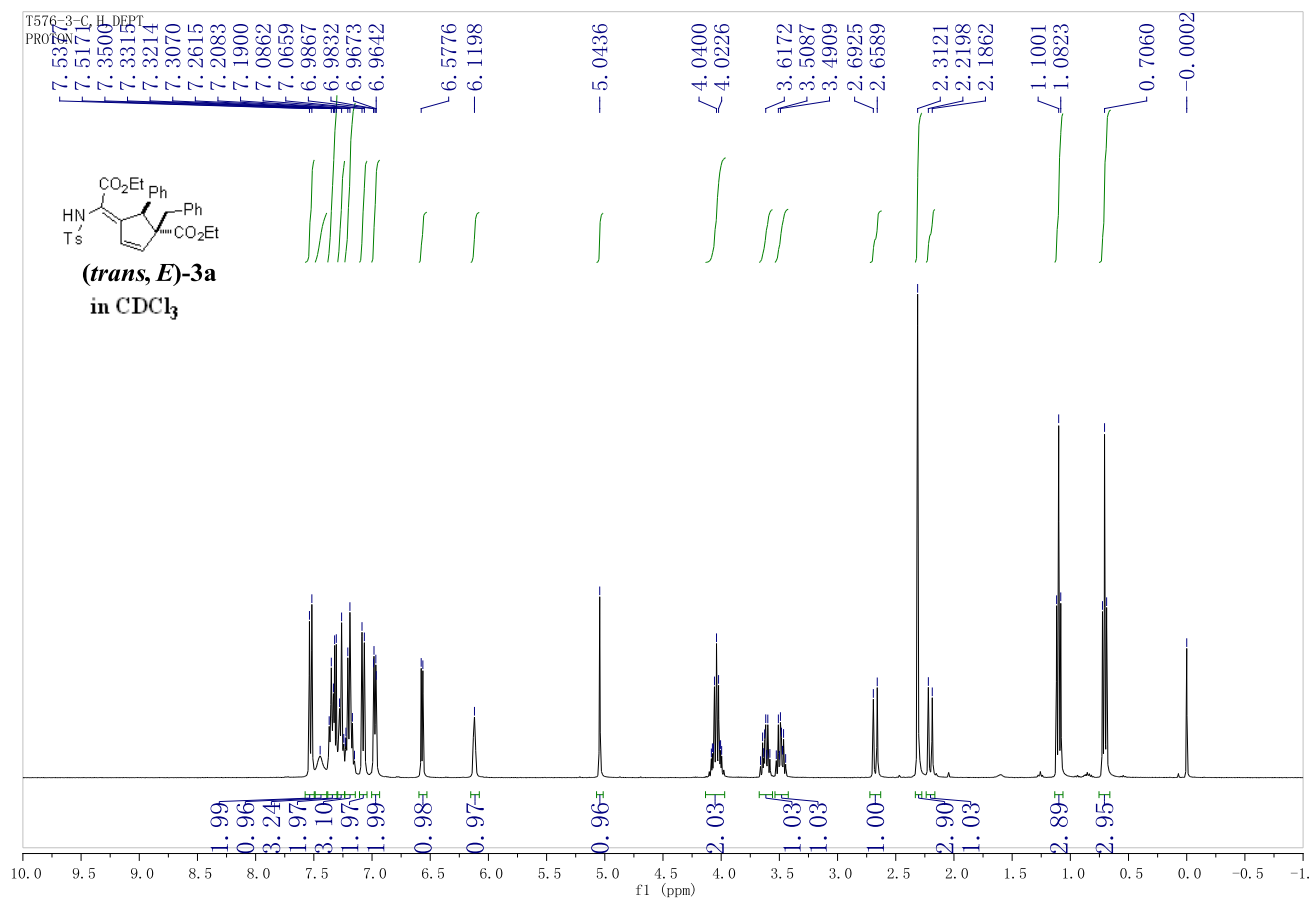

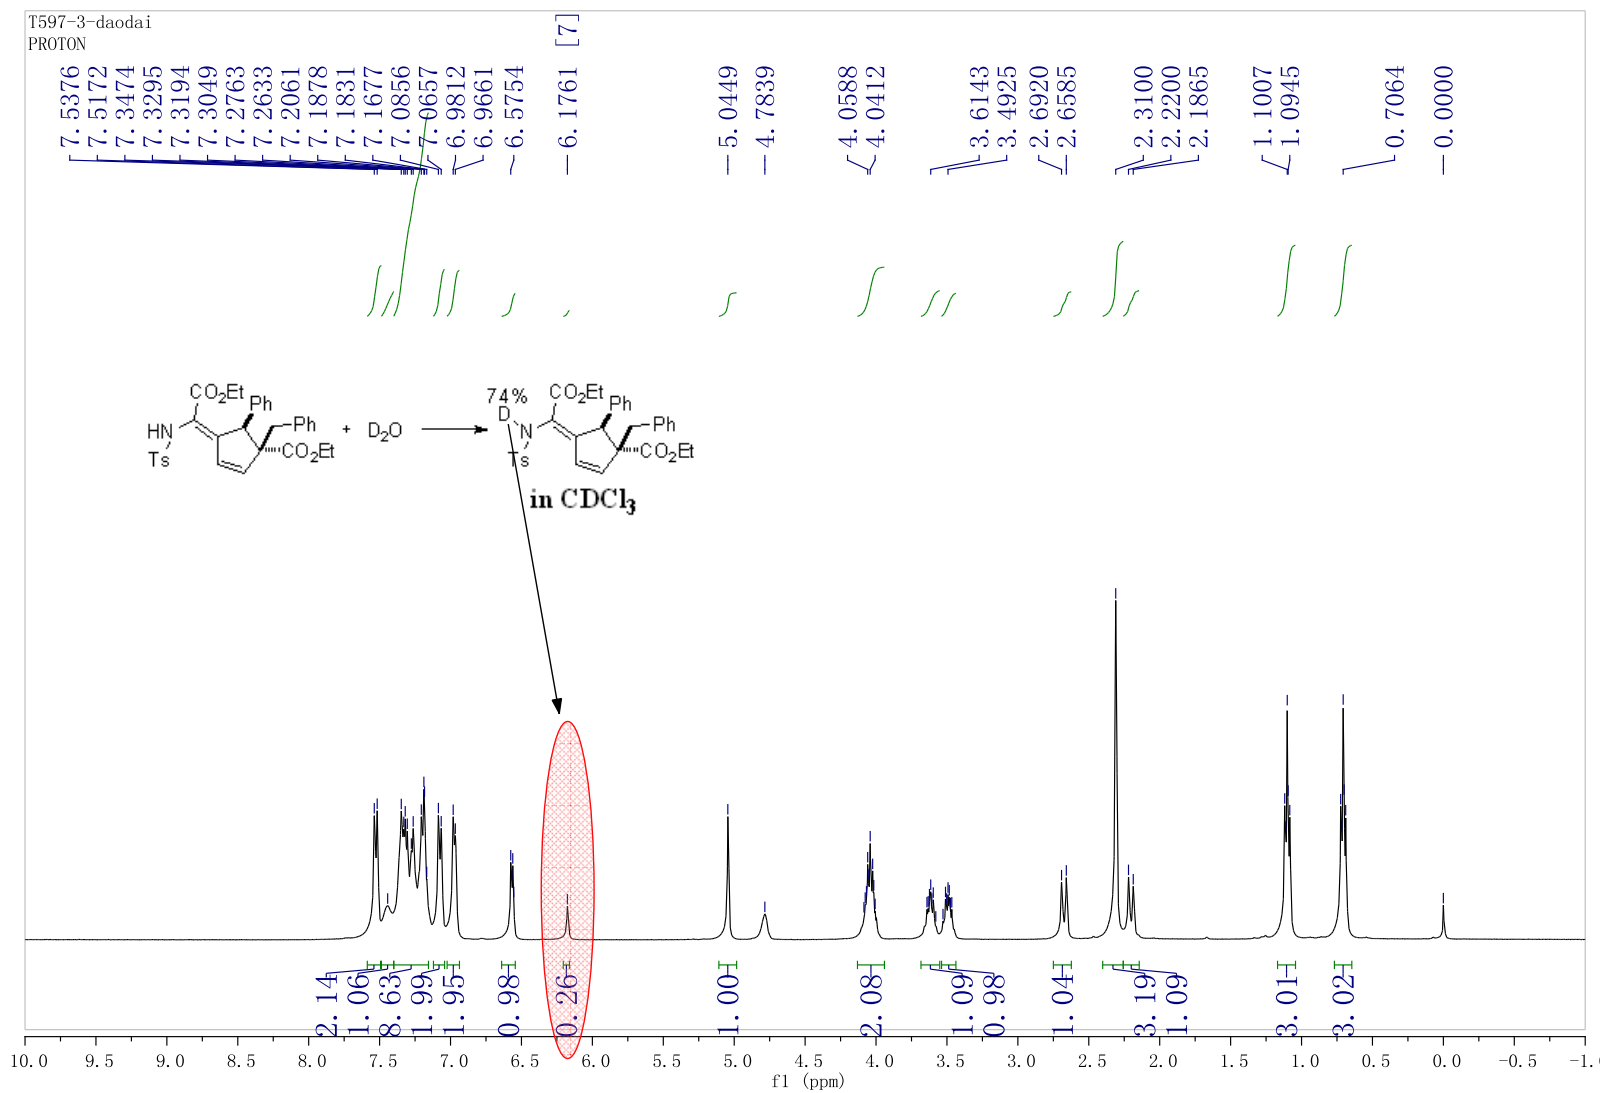



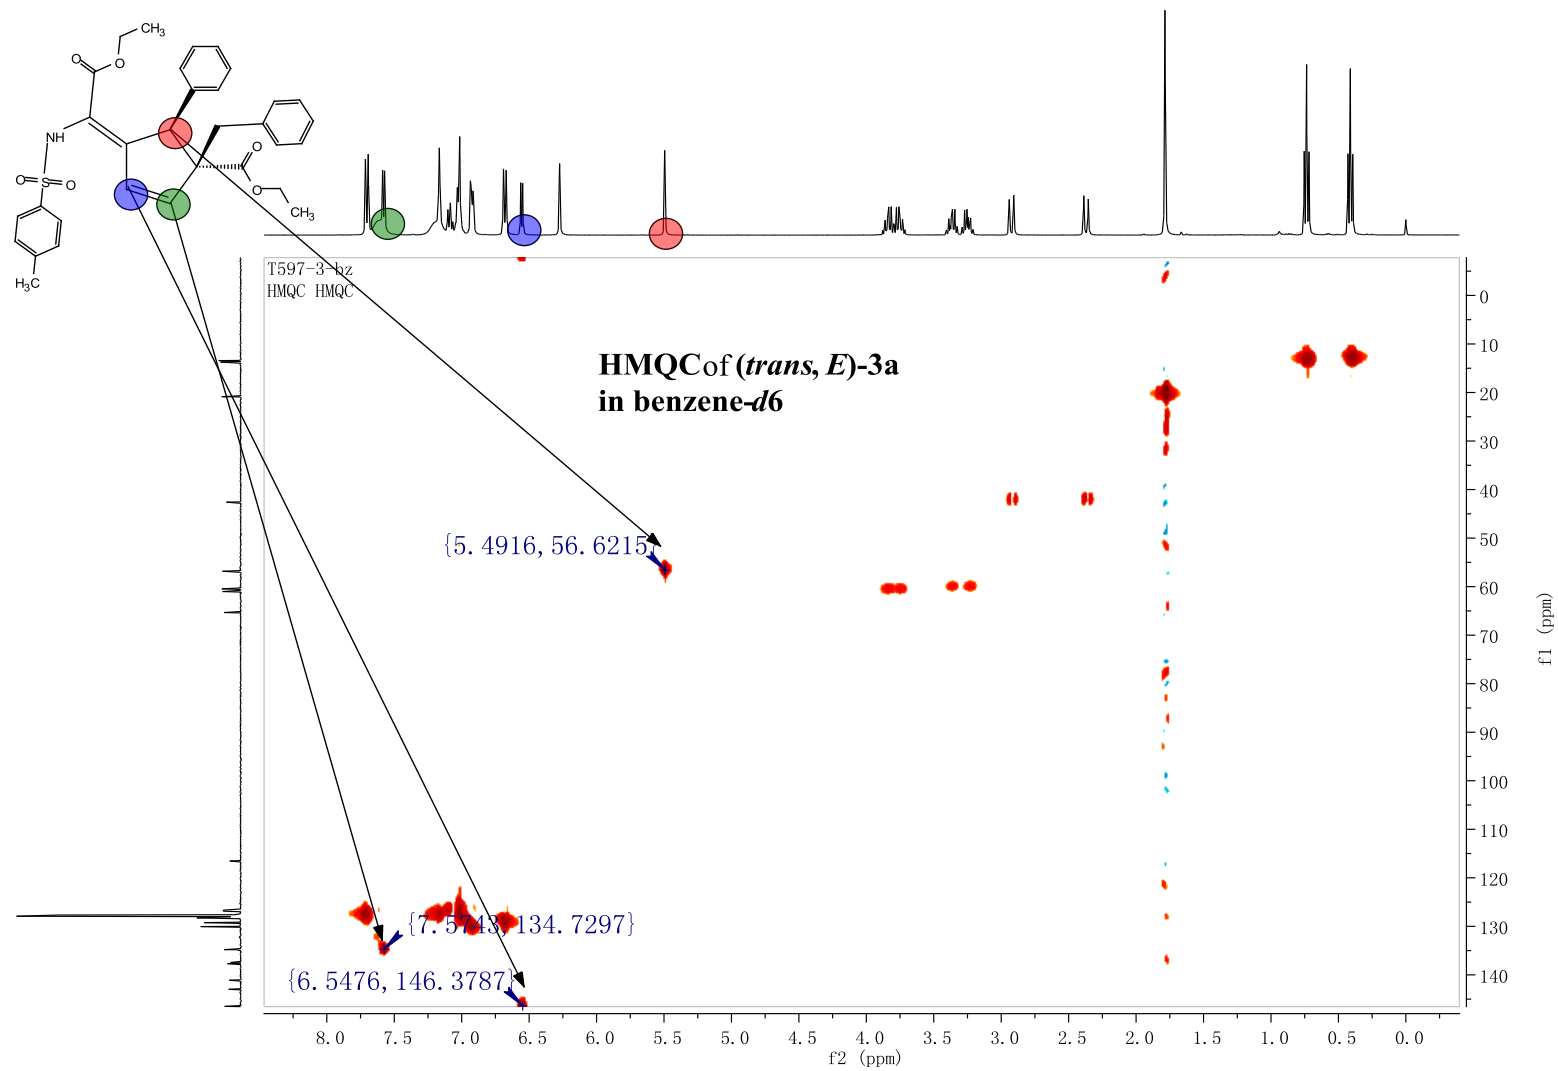

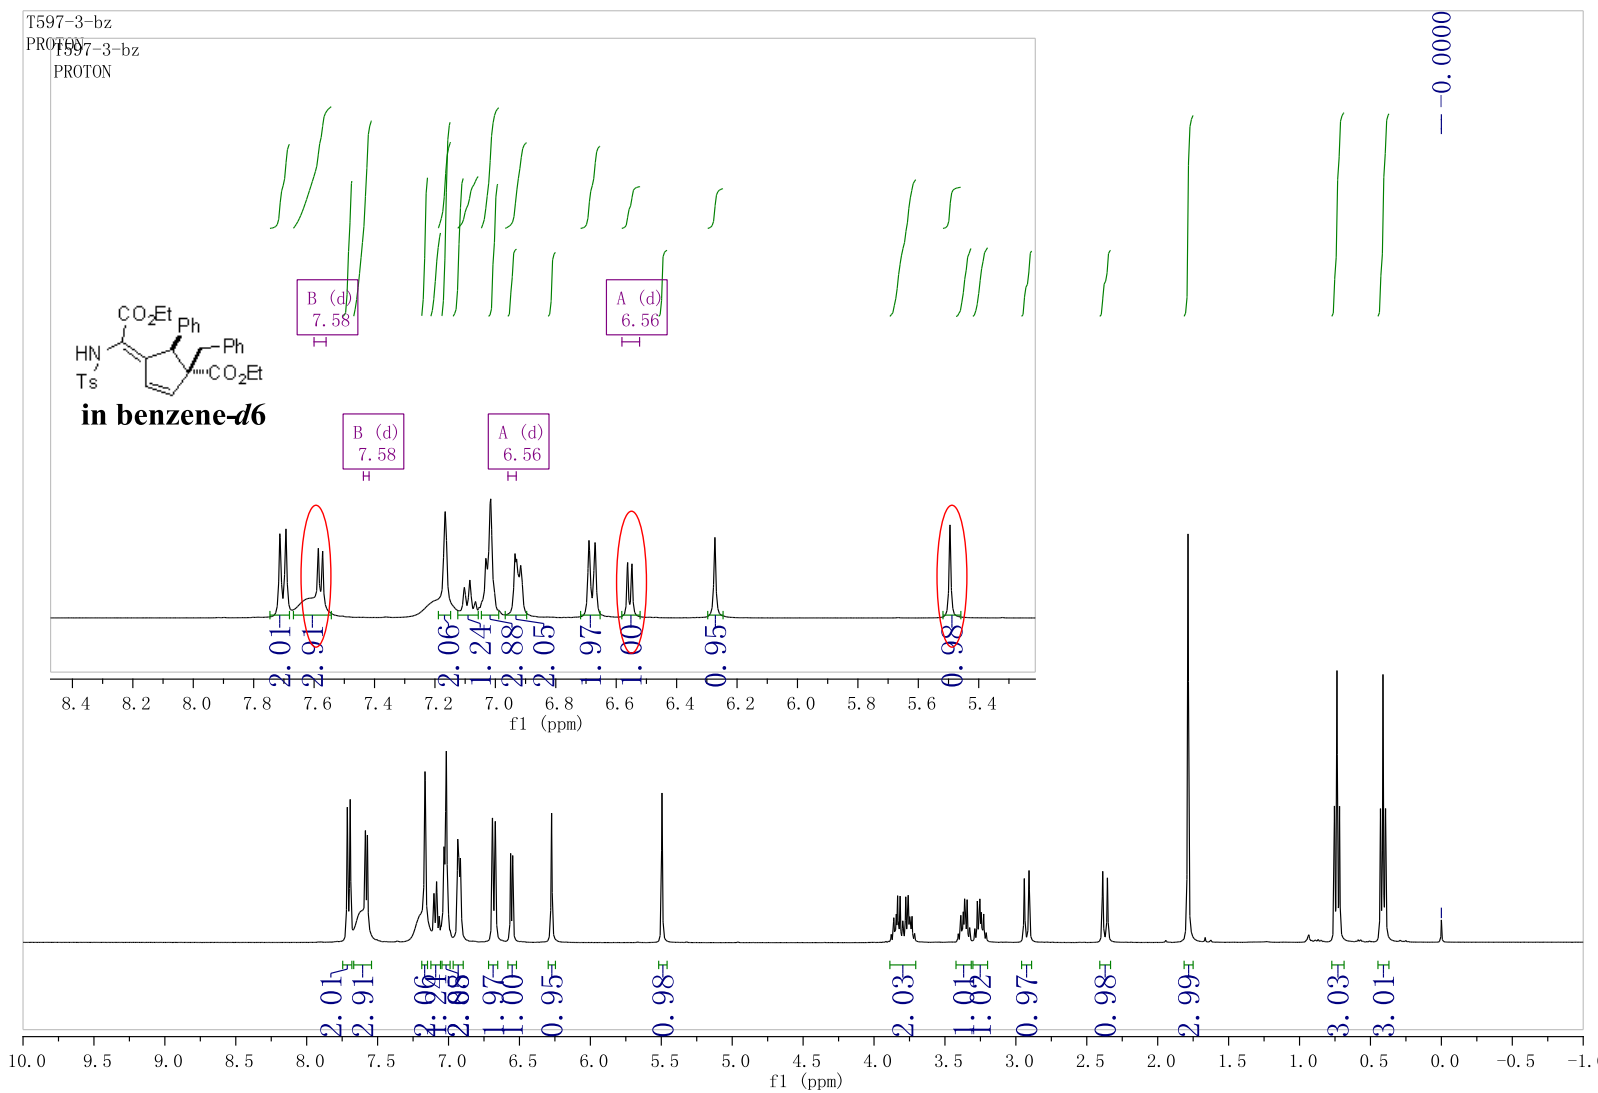

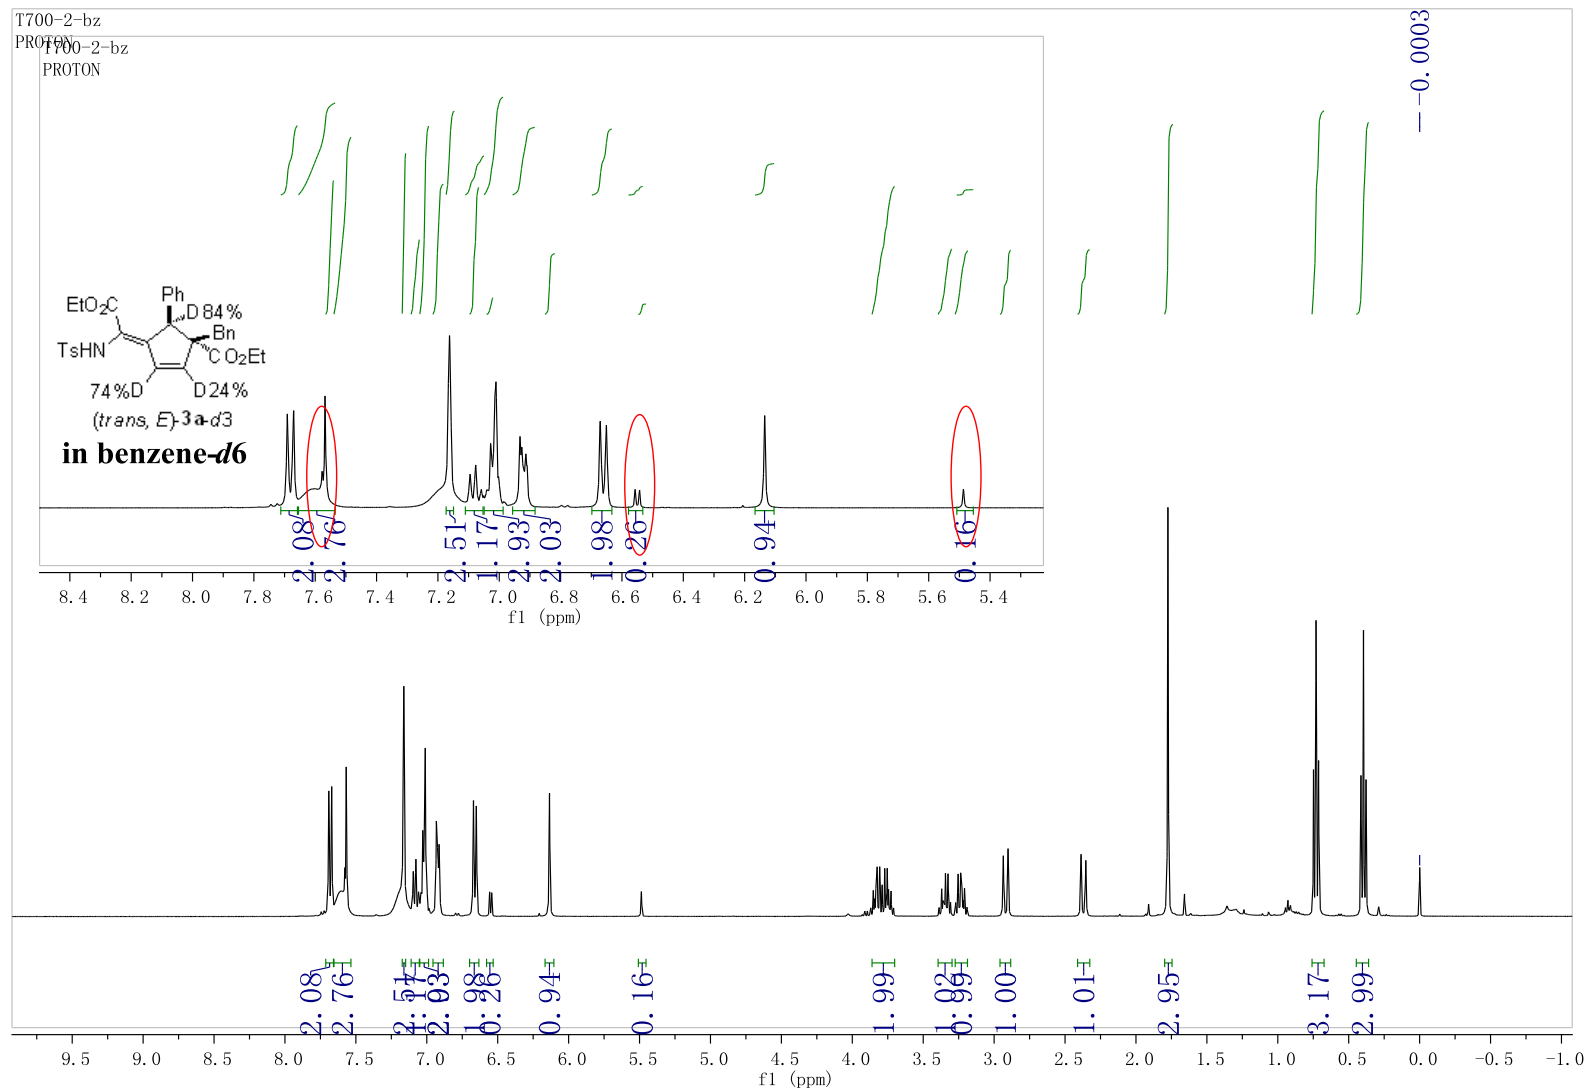

## V. $^1\text{H}$ and $^{13}\text{C}$ NMR Spectra for Compounds 3

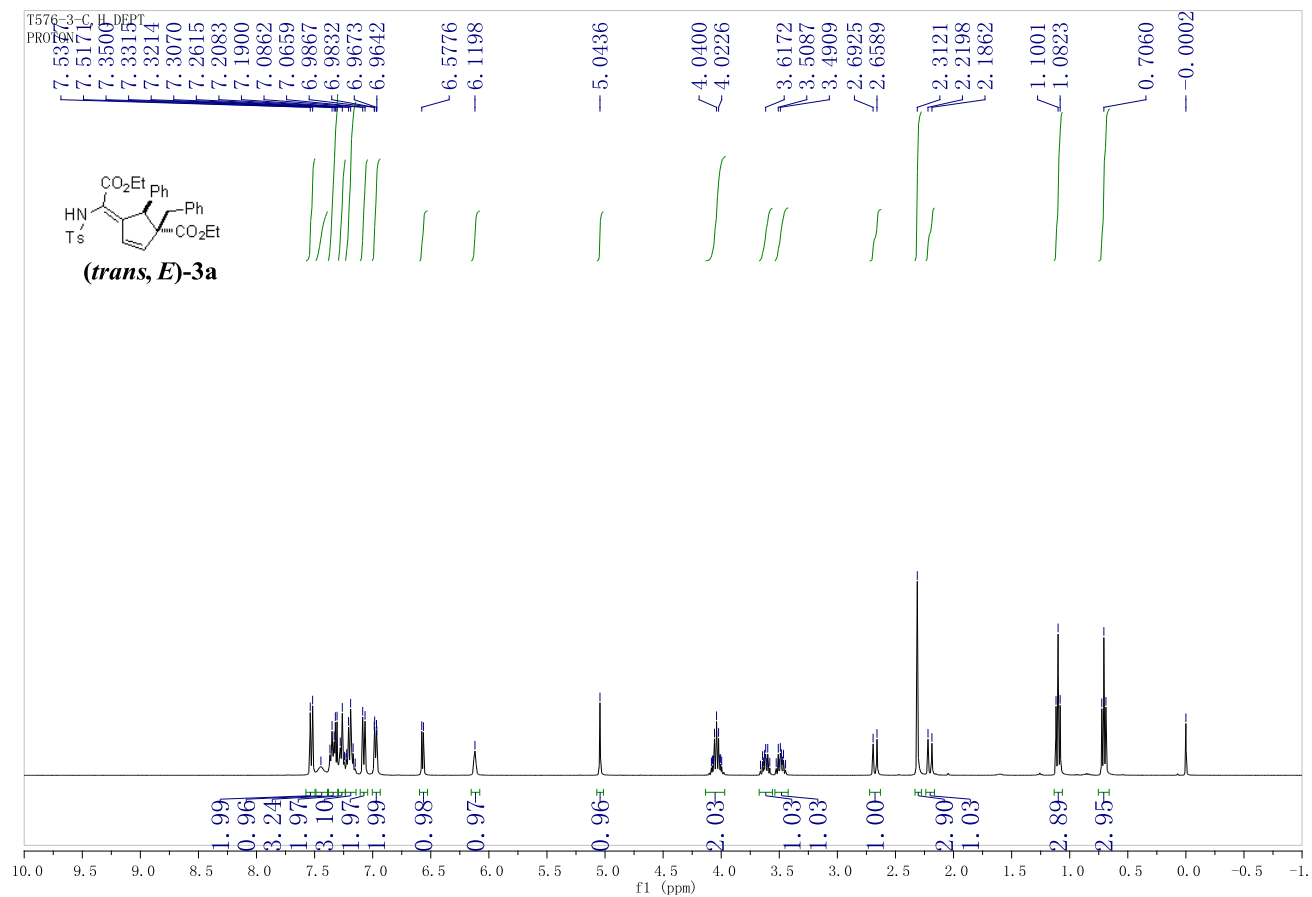

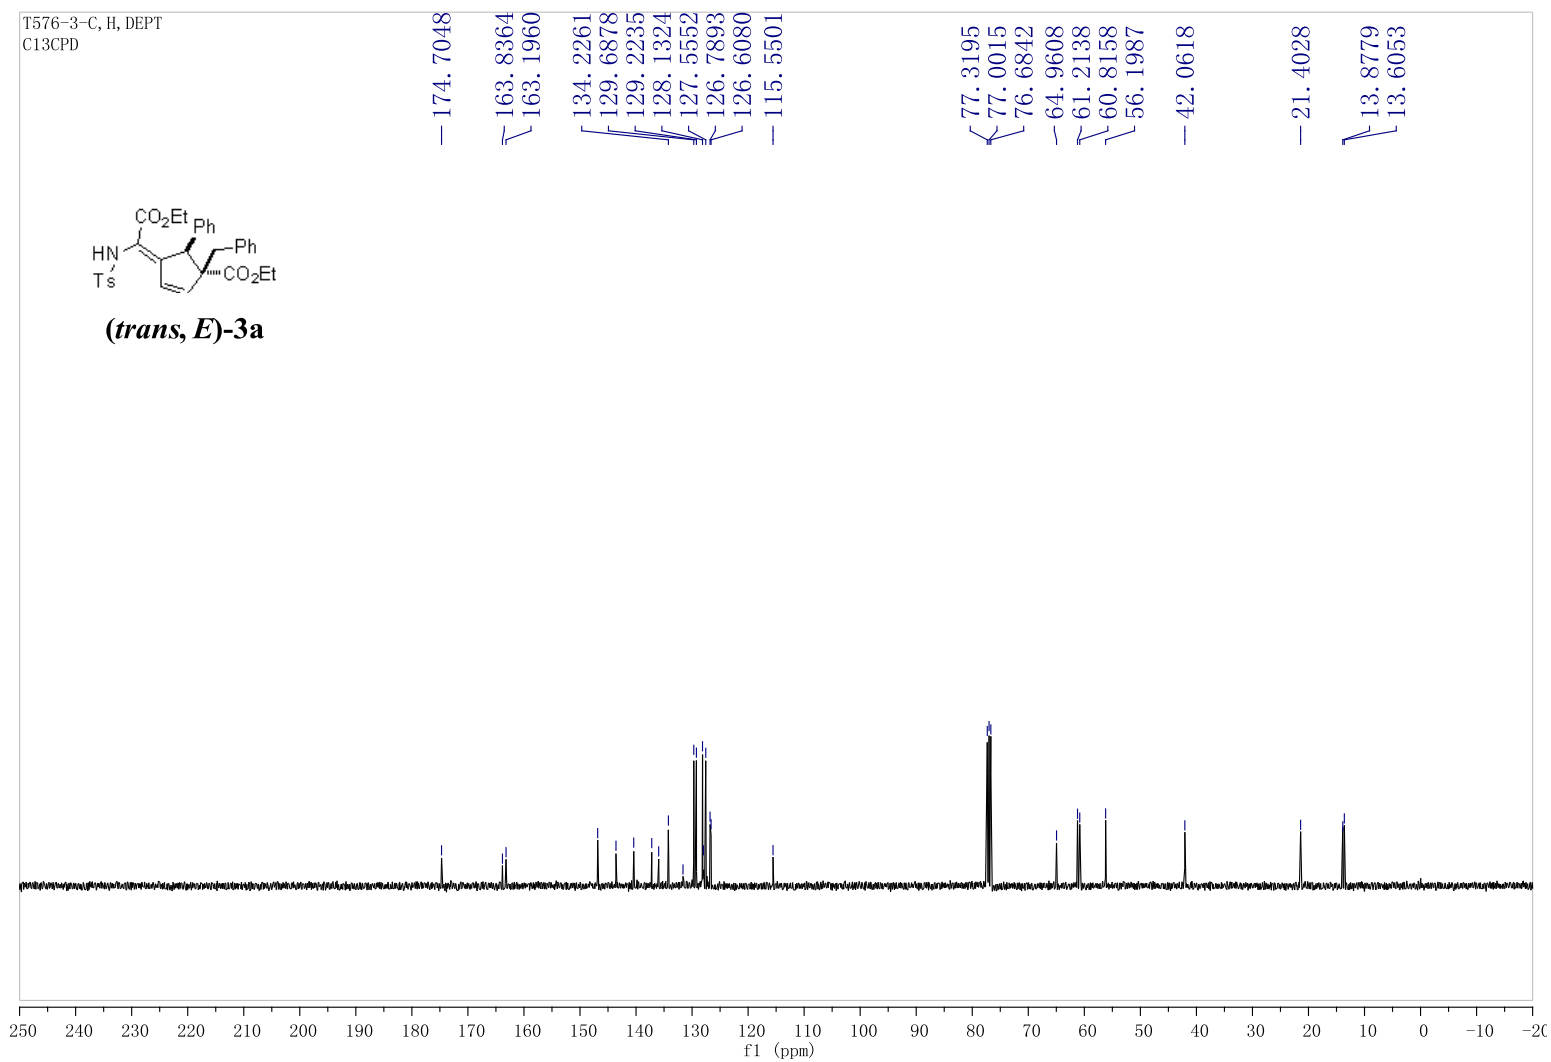

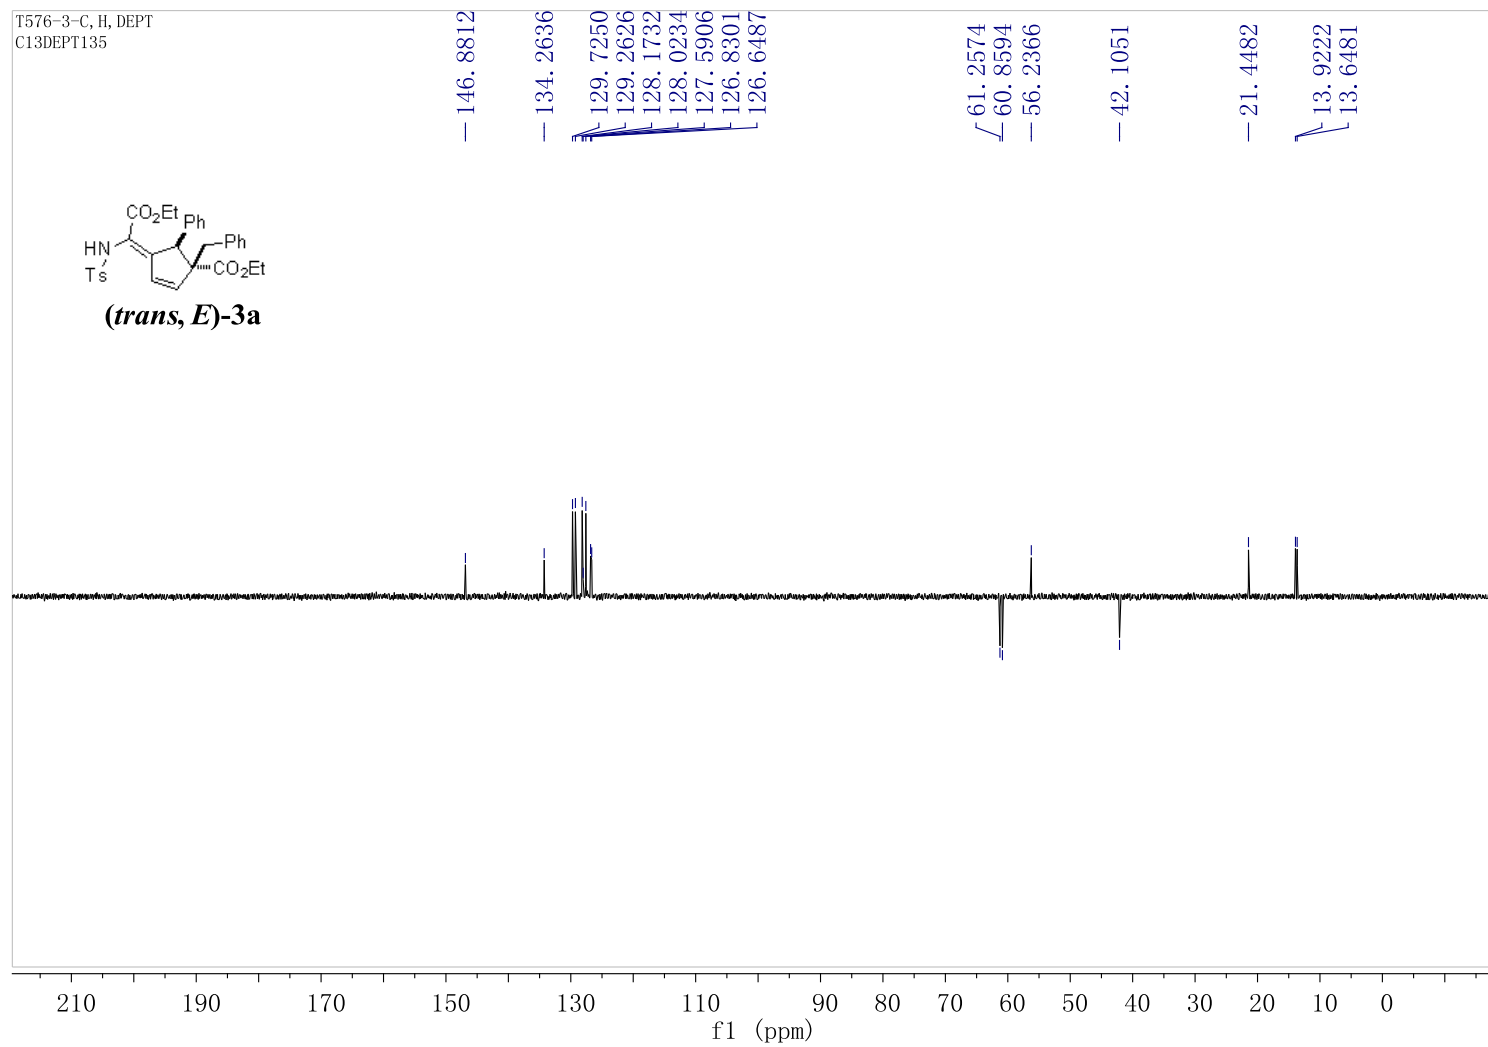

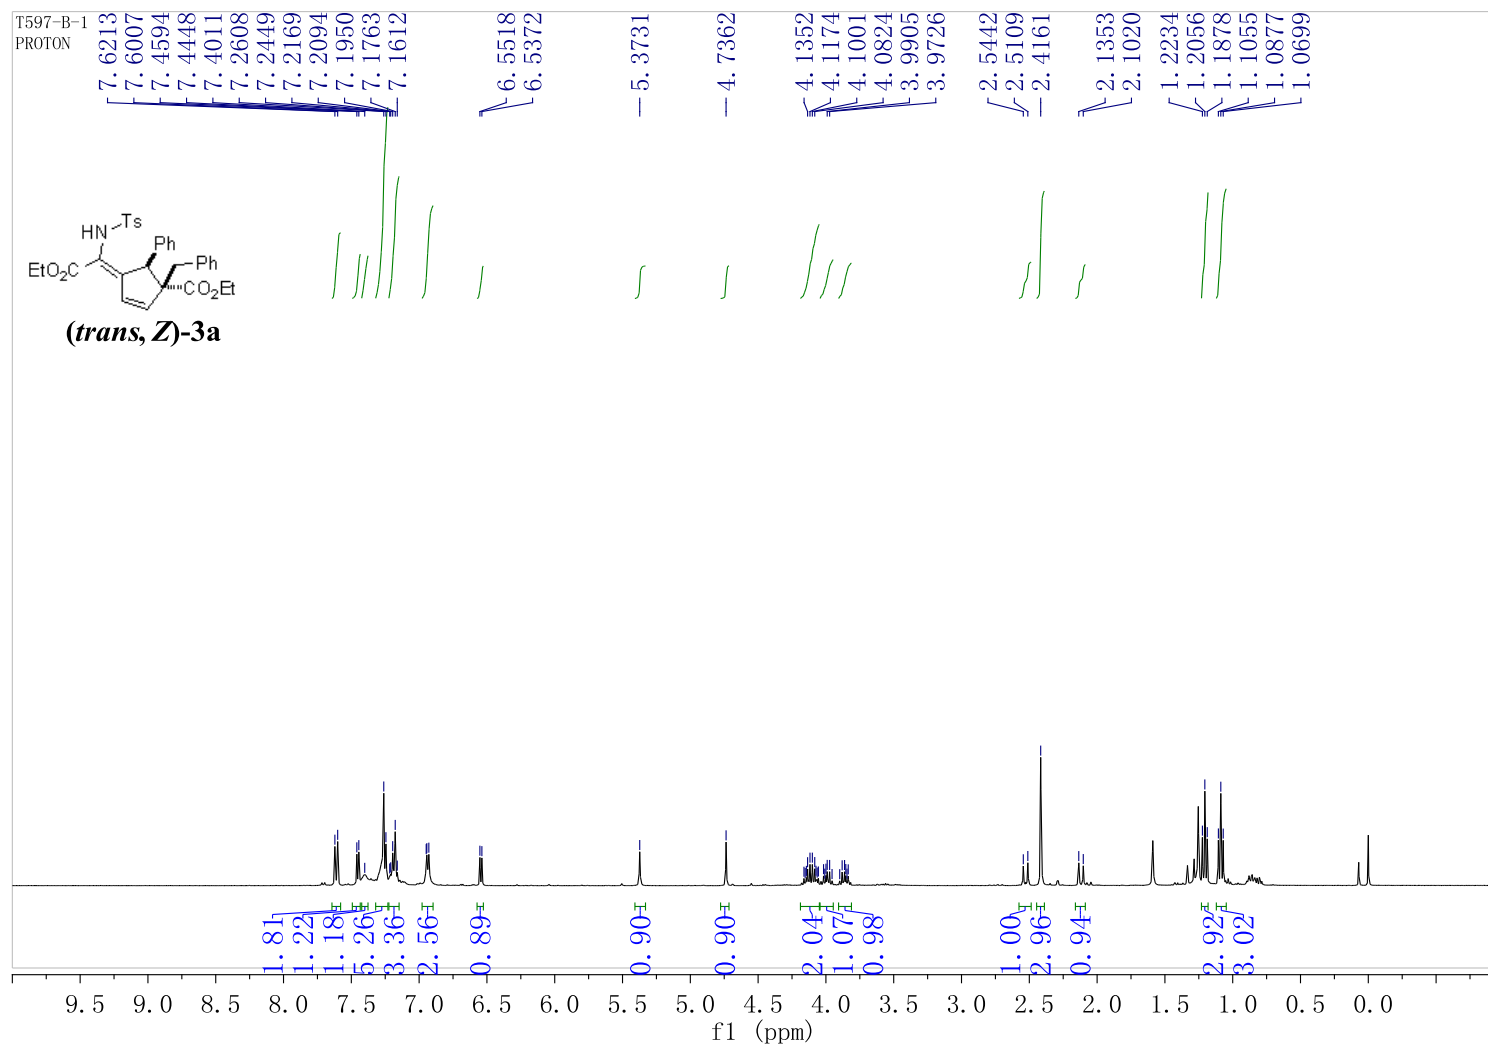

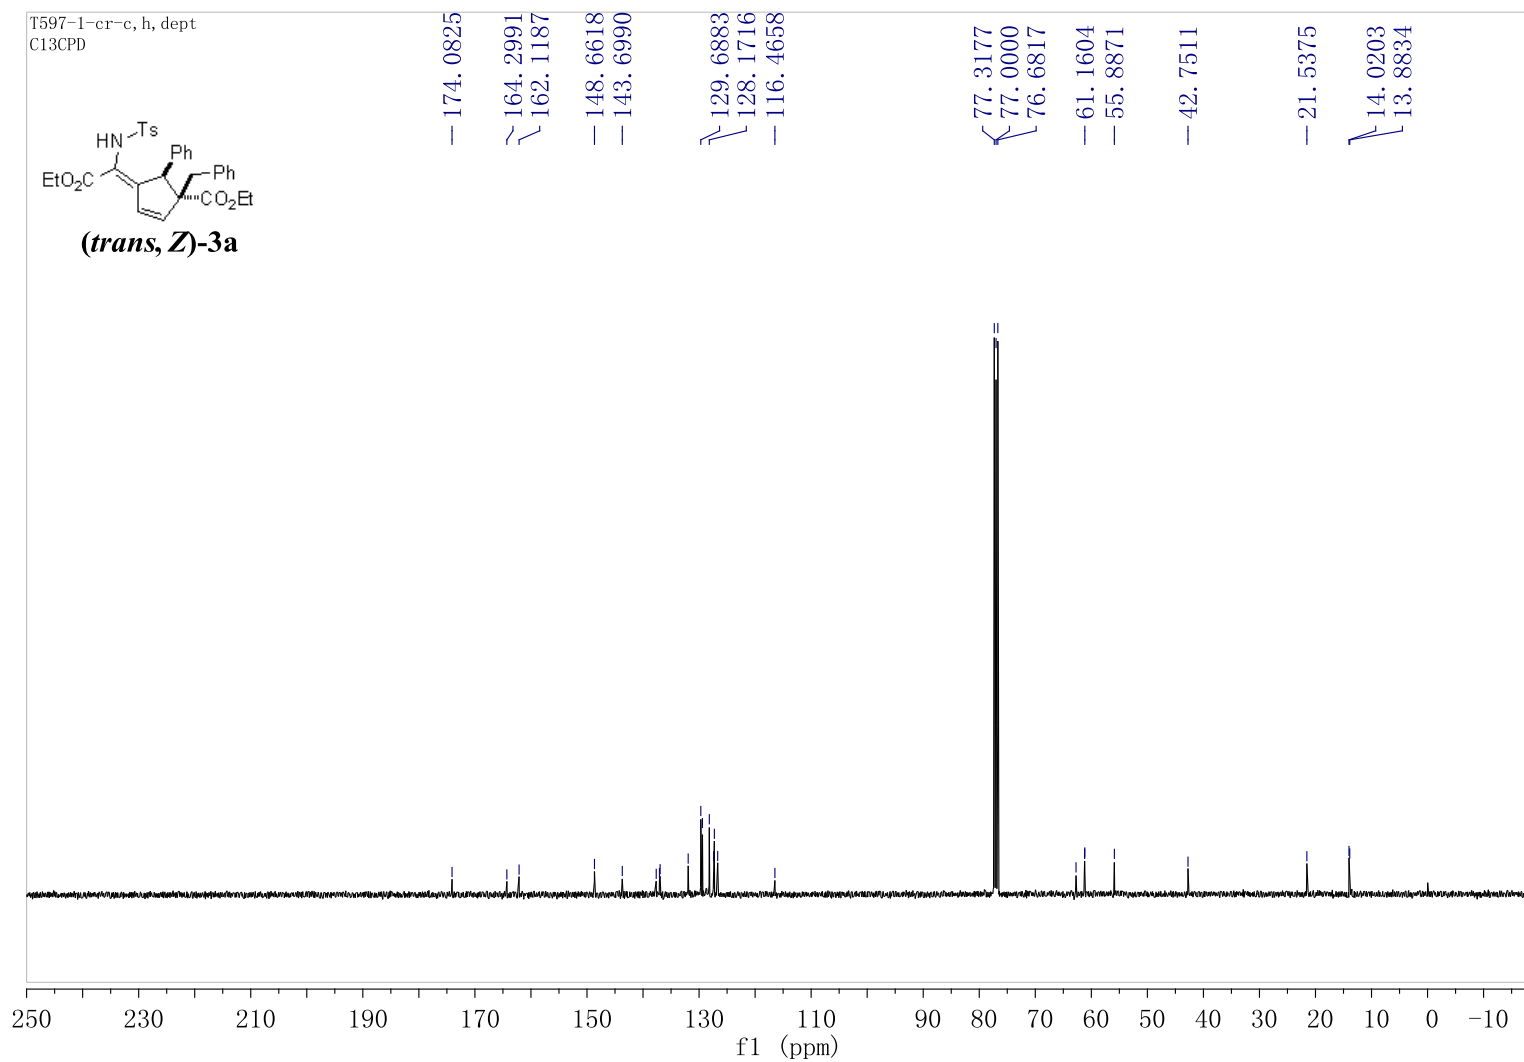



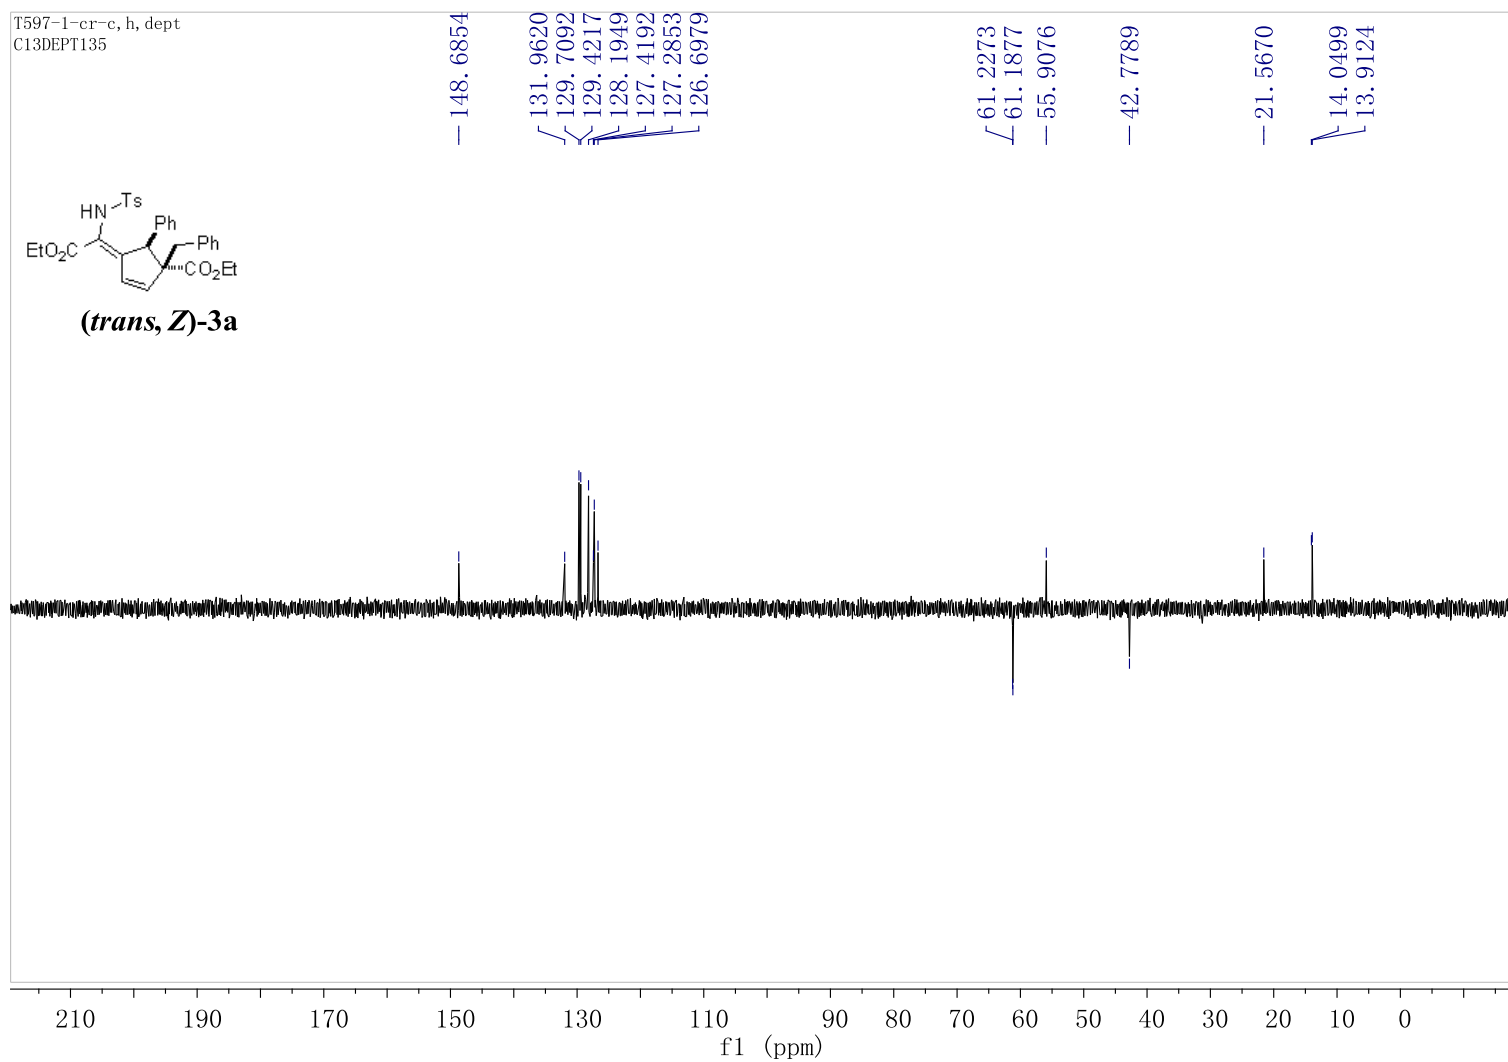

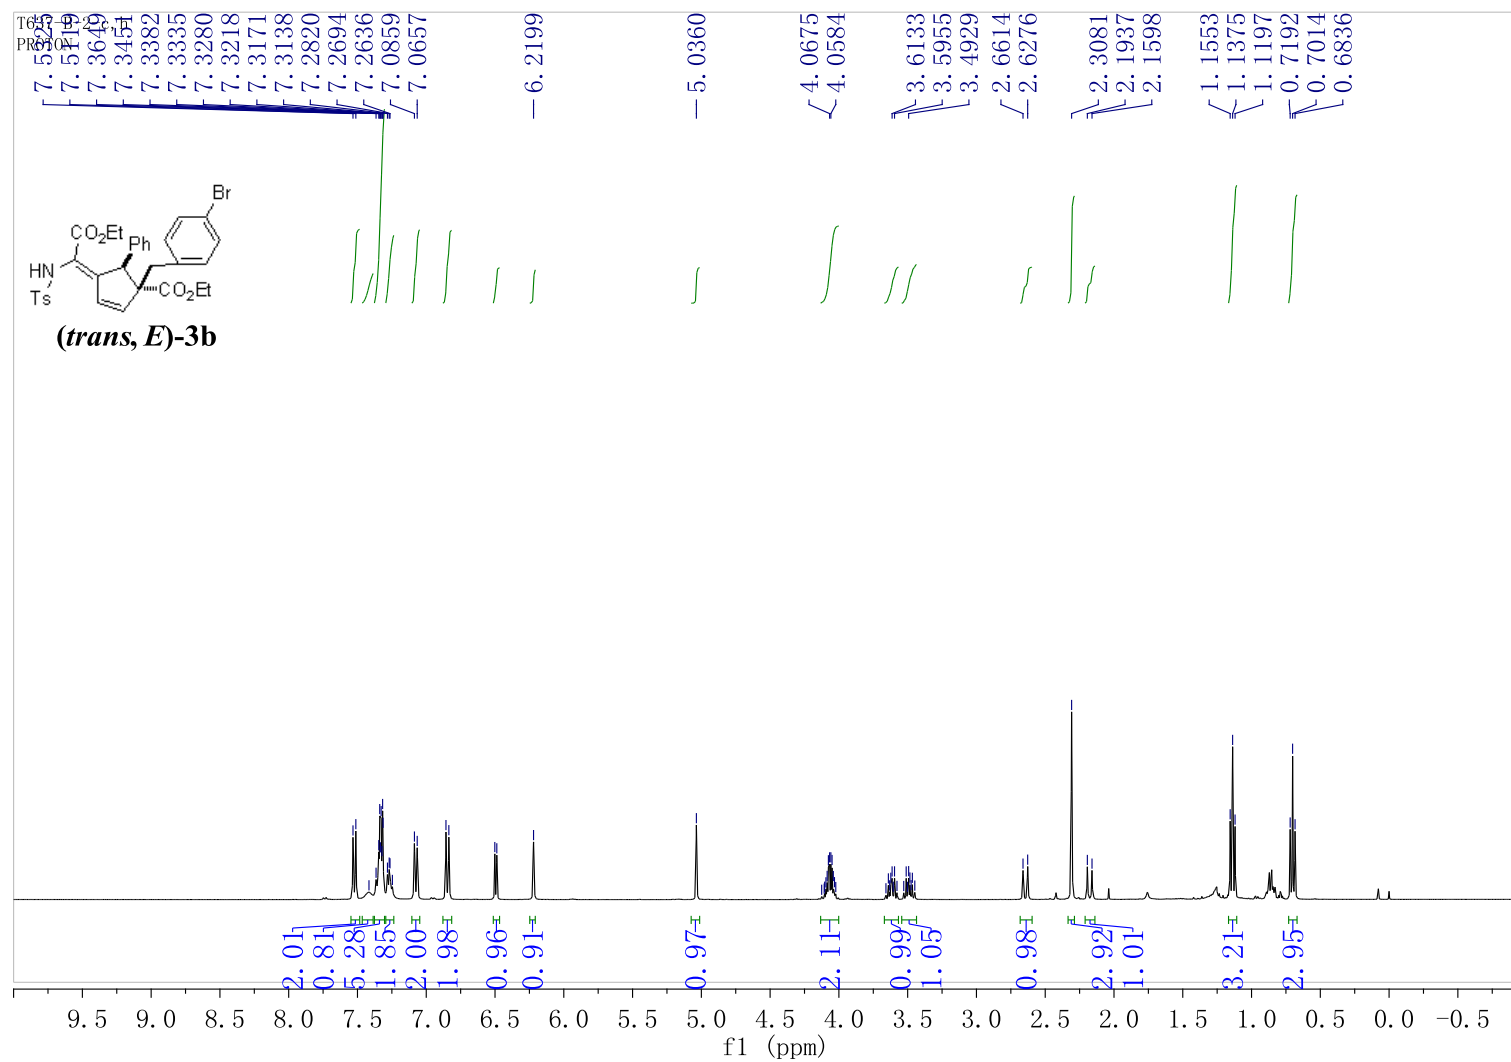

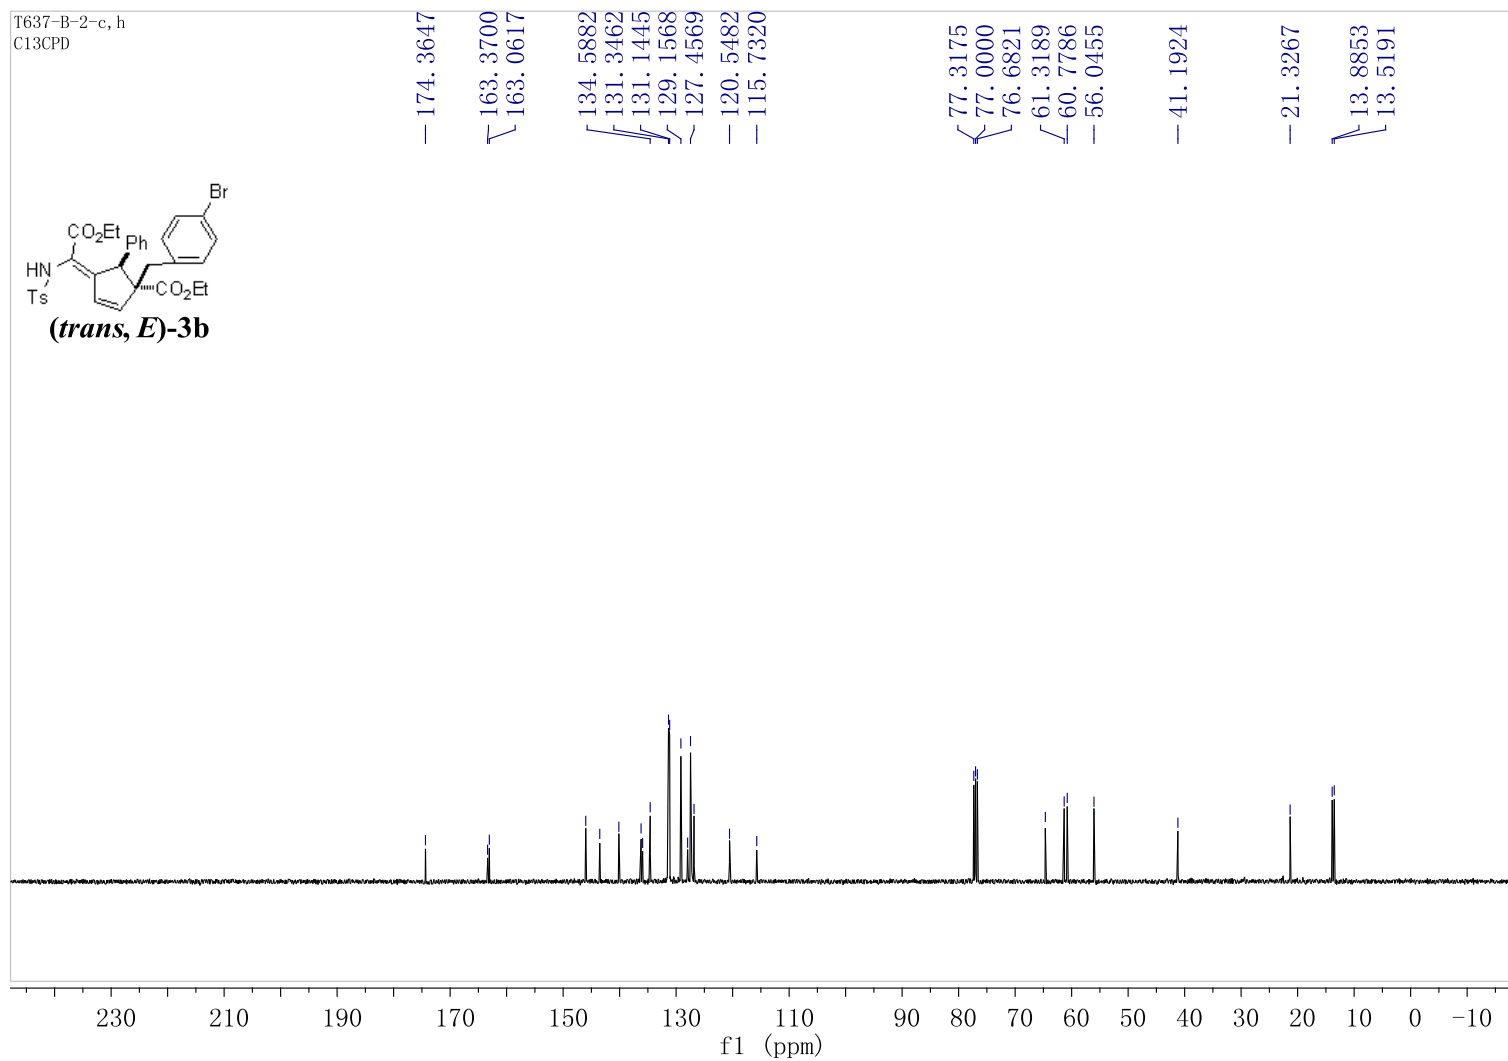

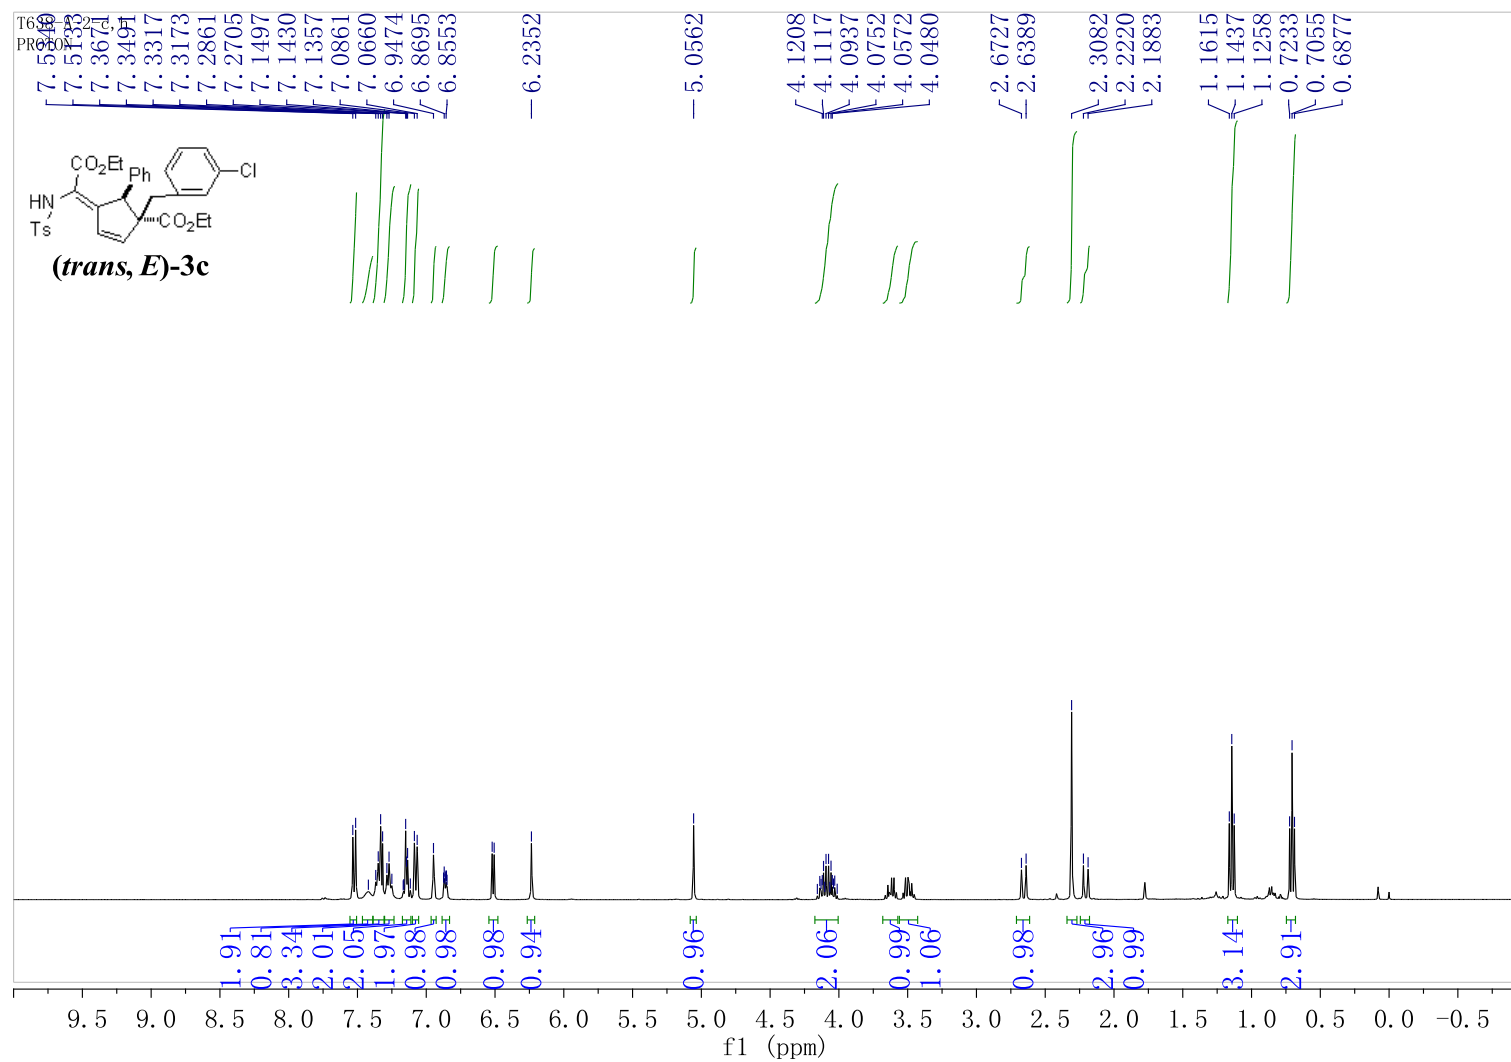

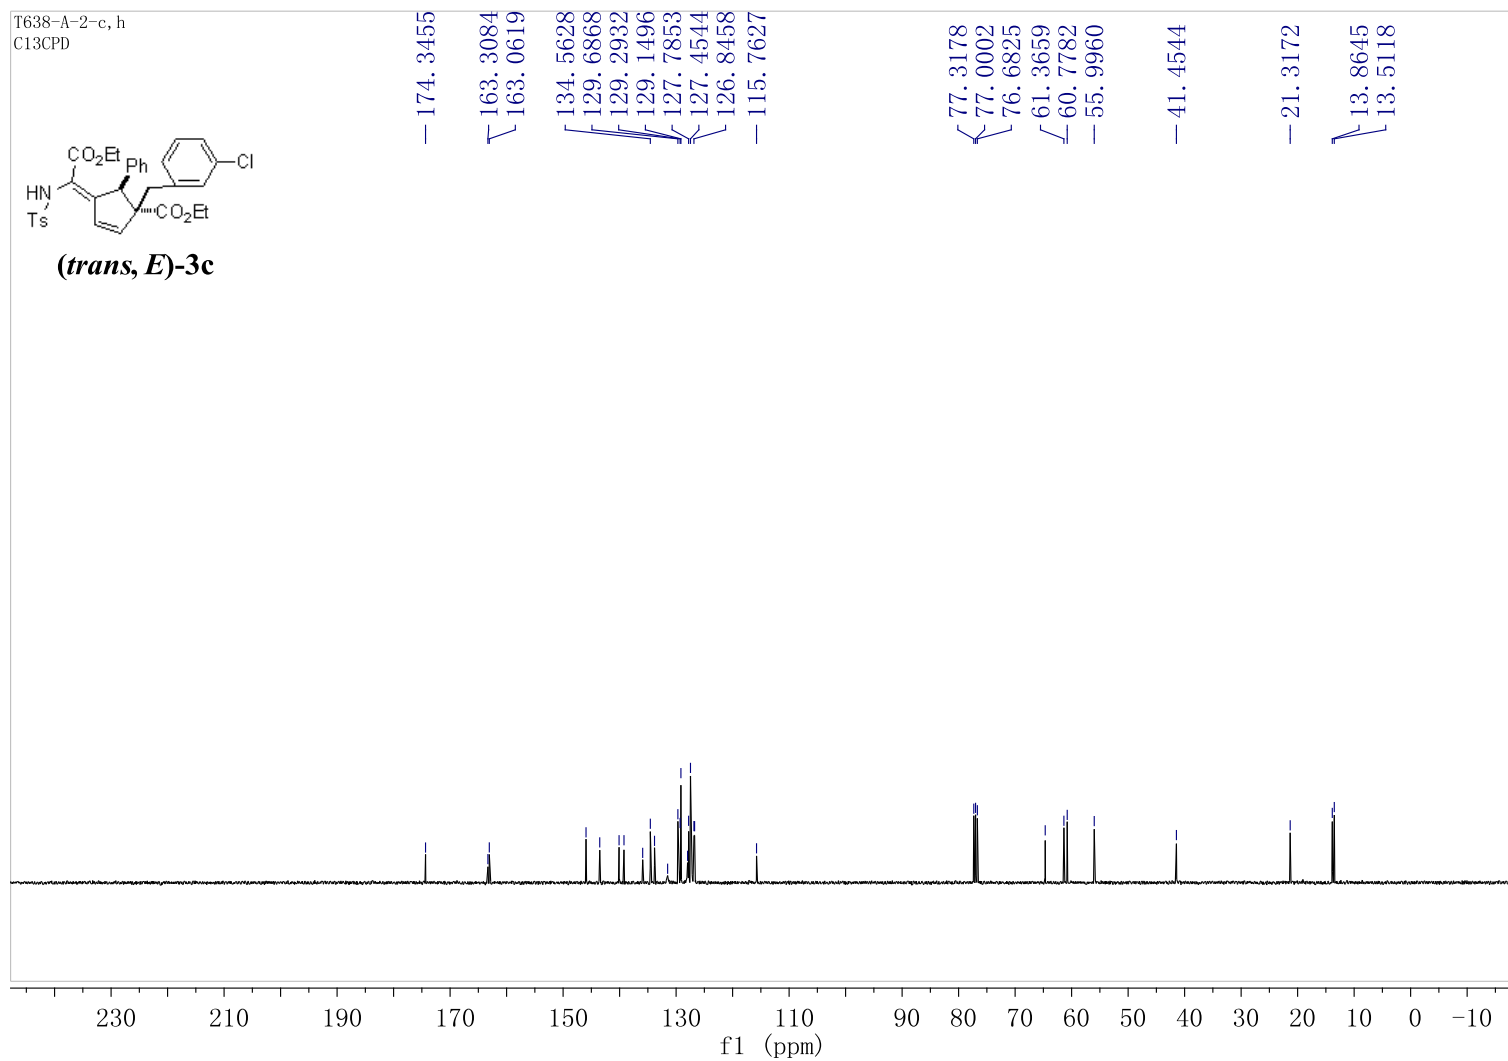

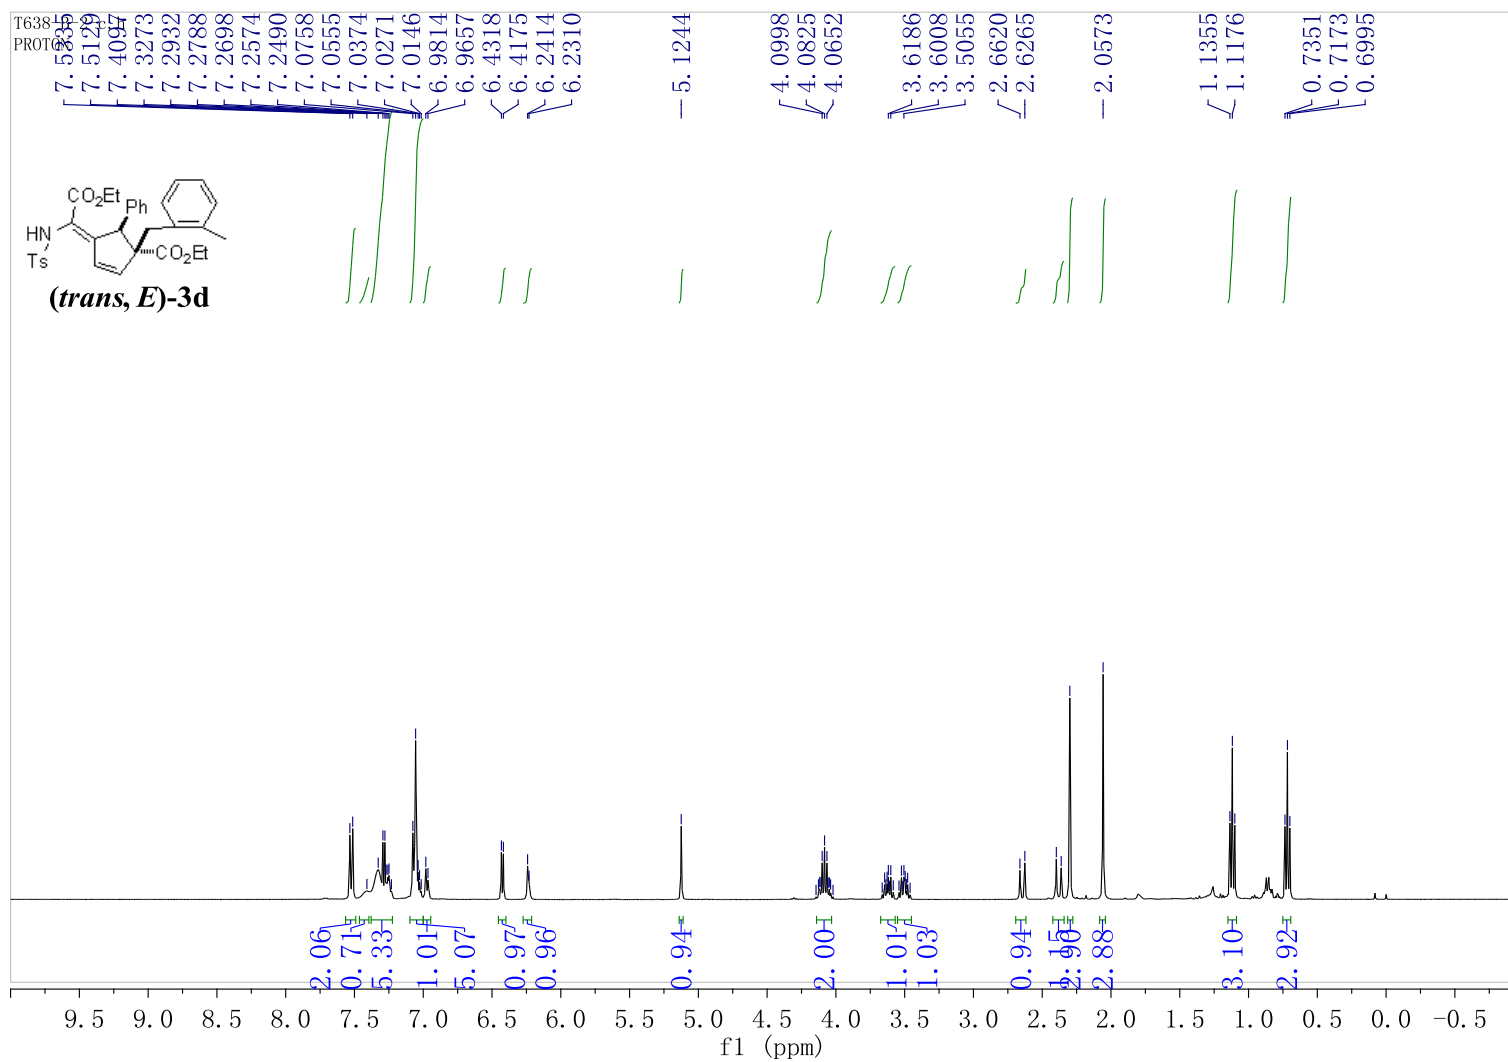

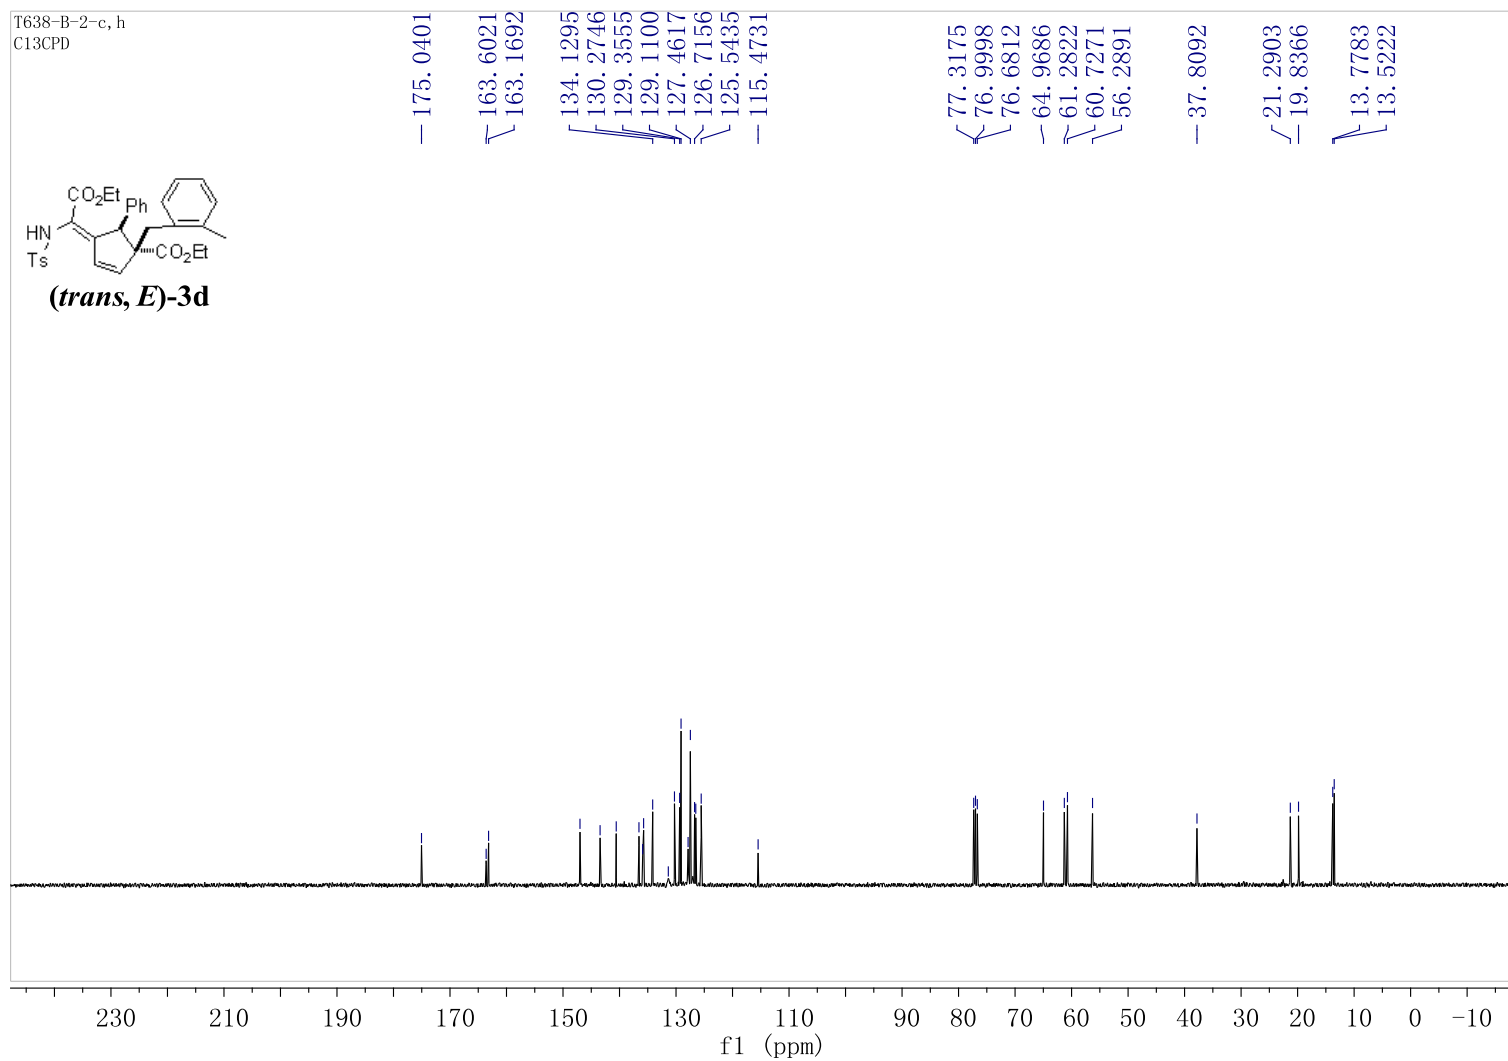

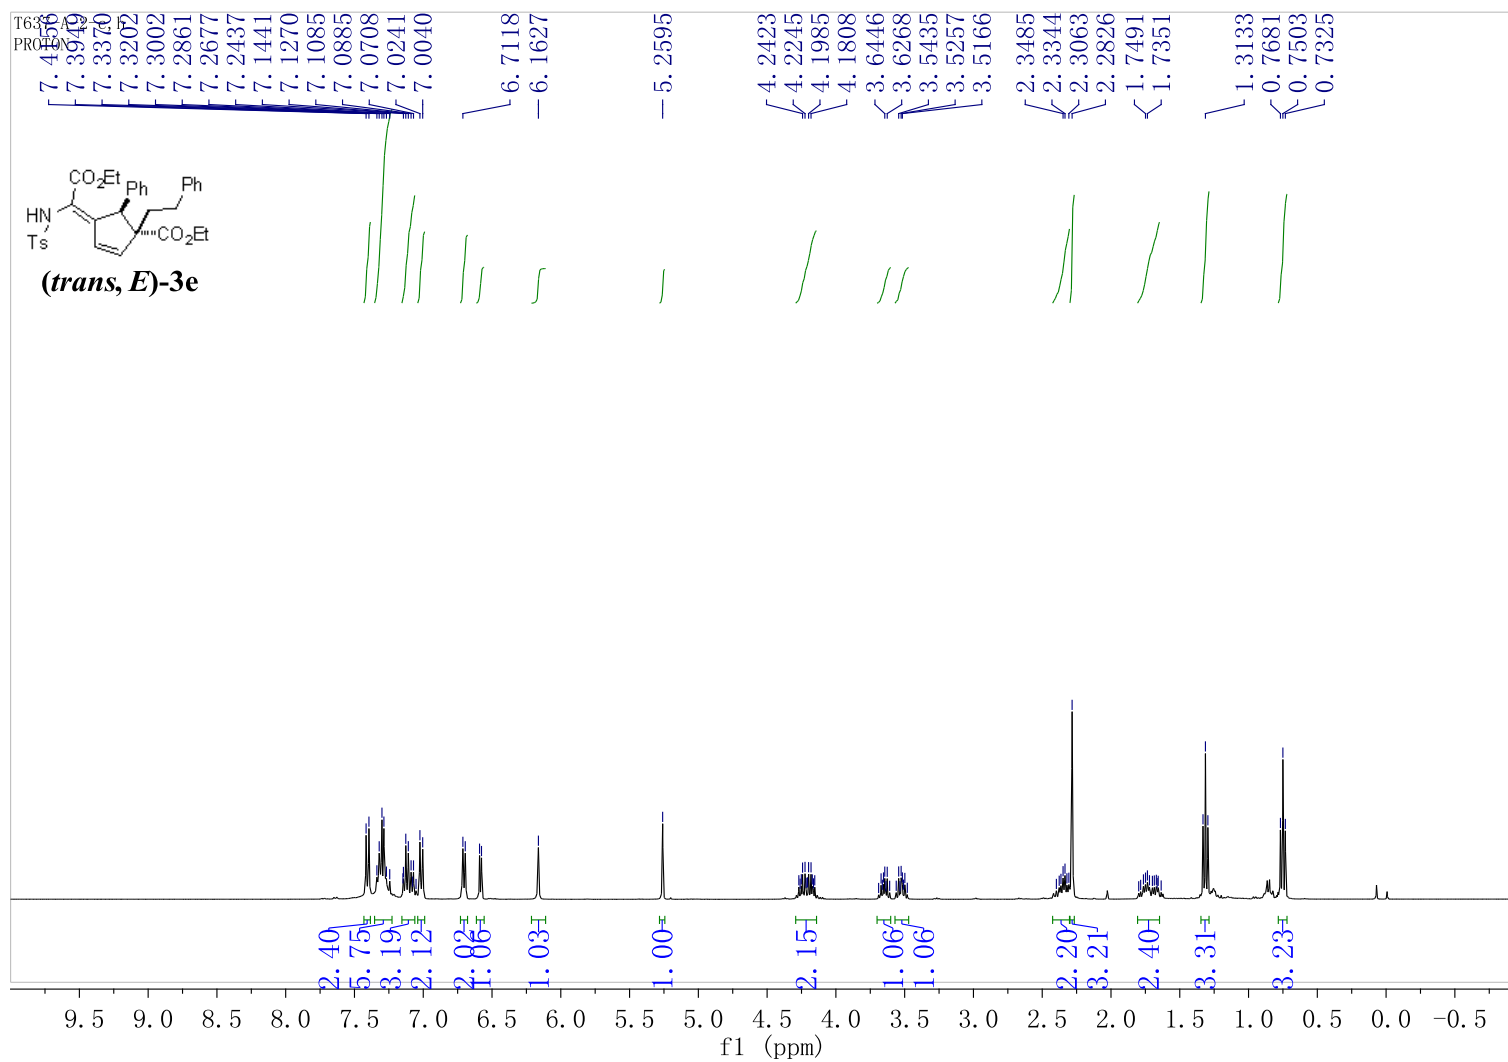



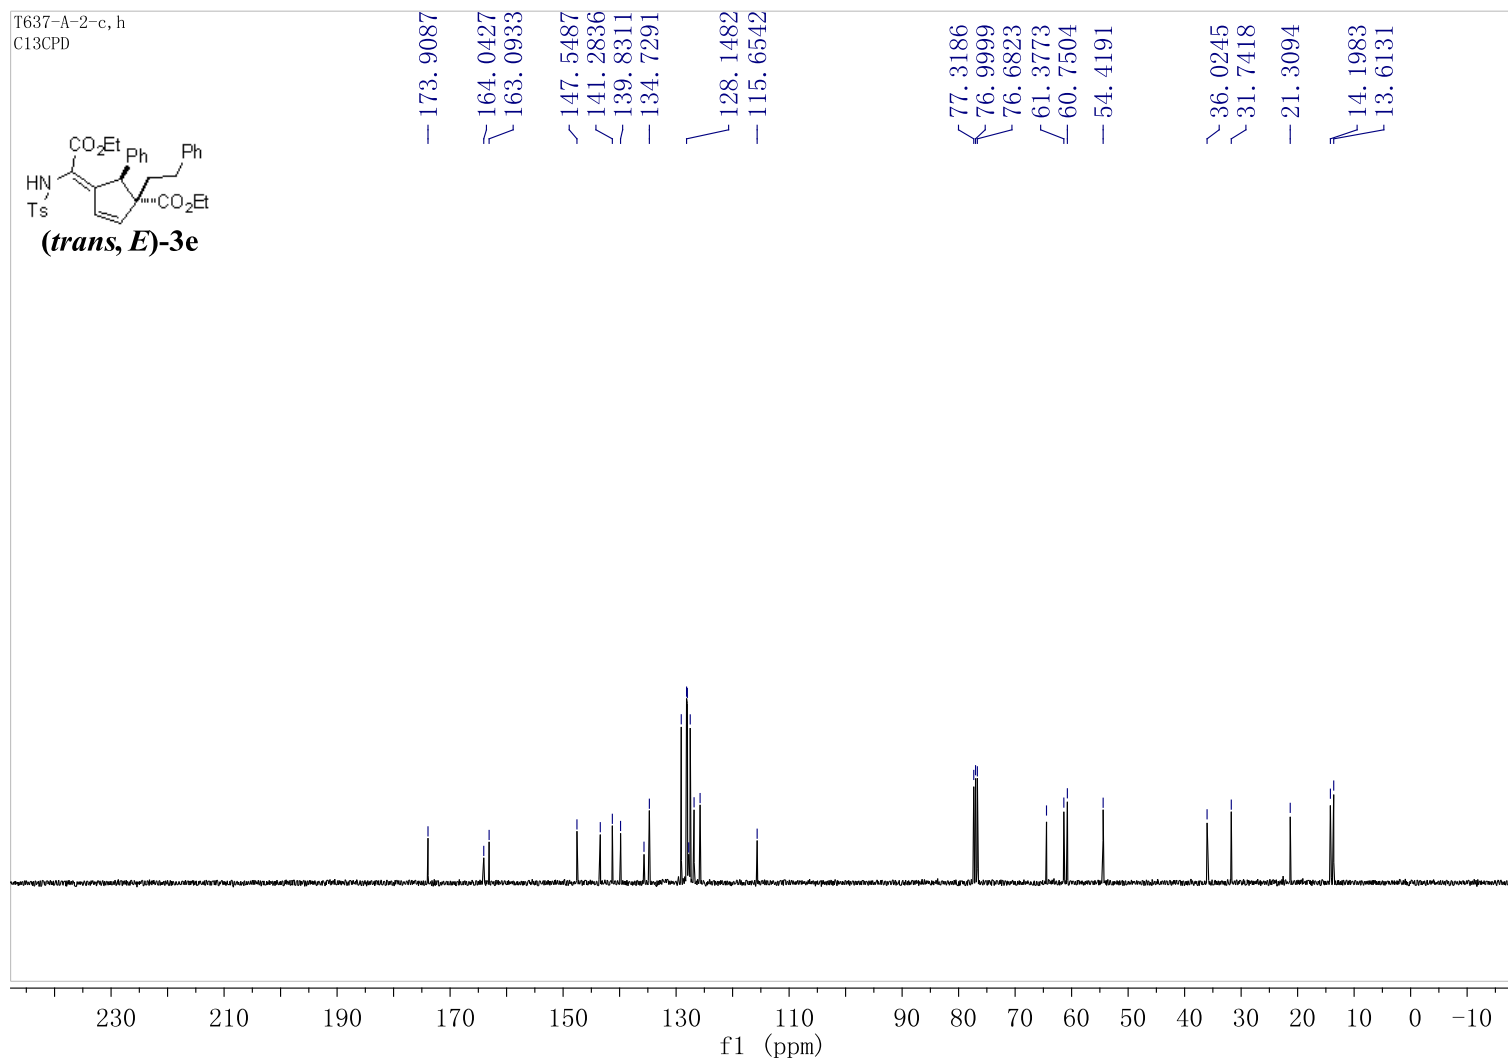

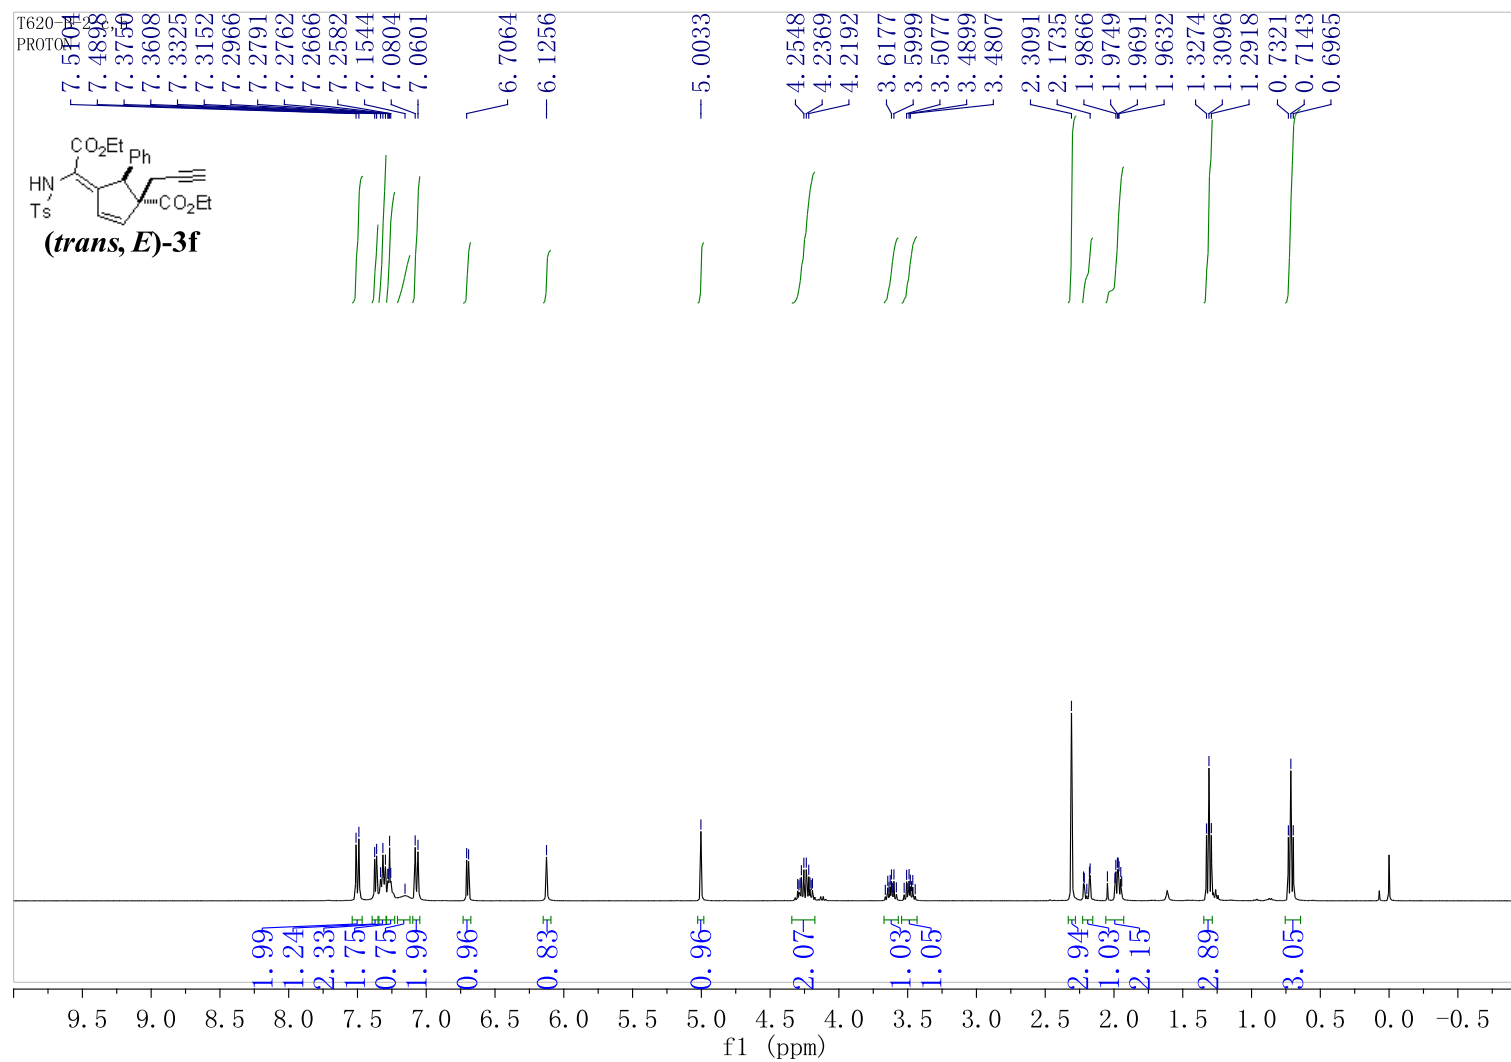

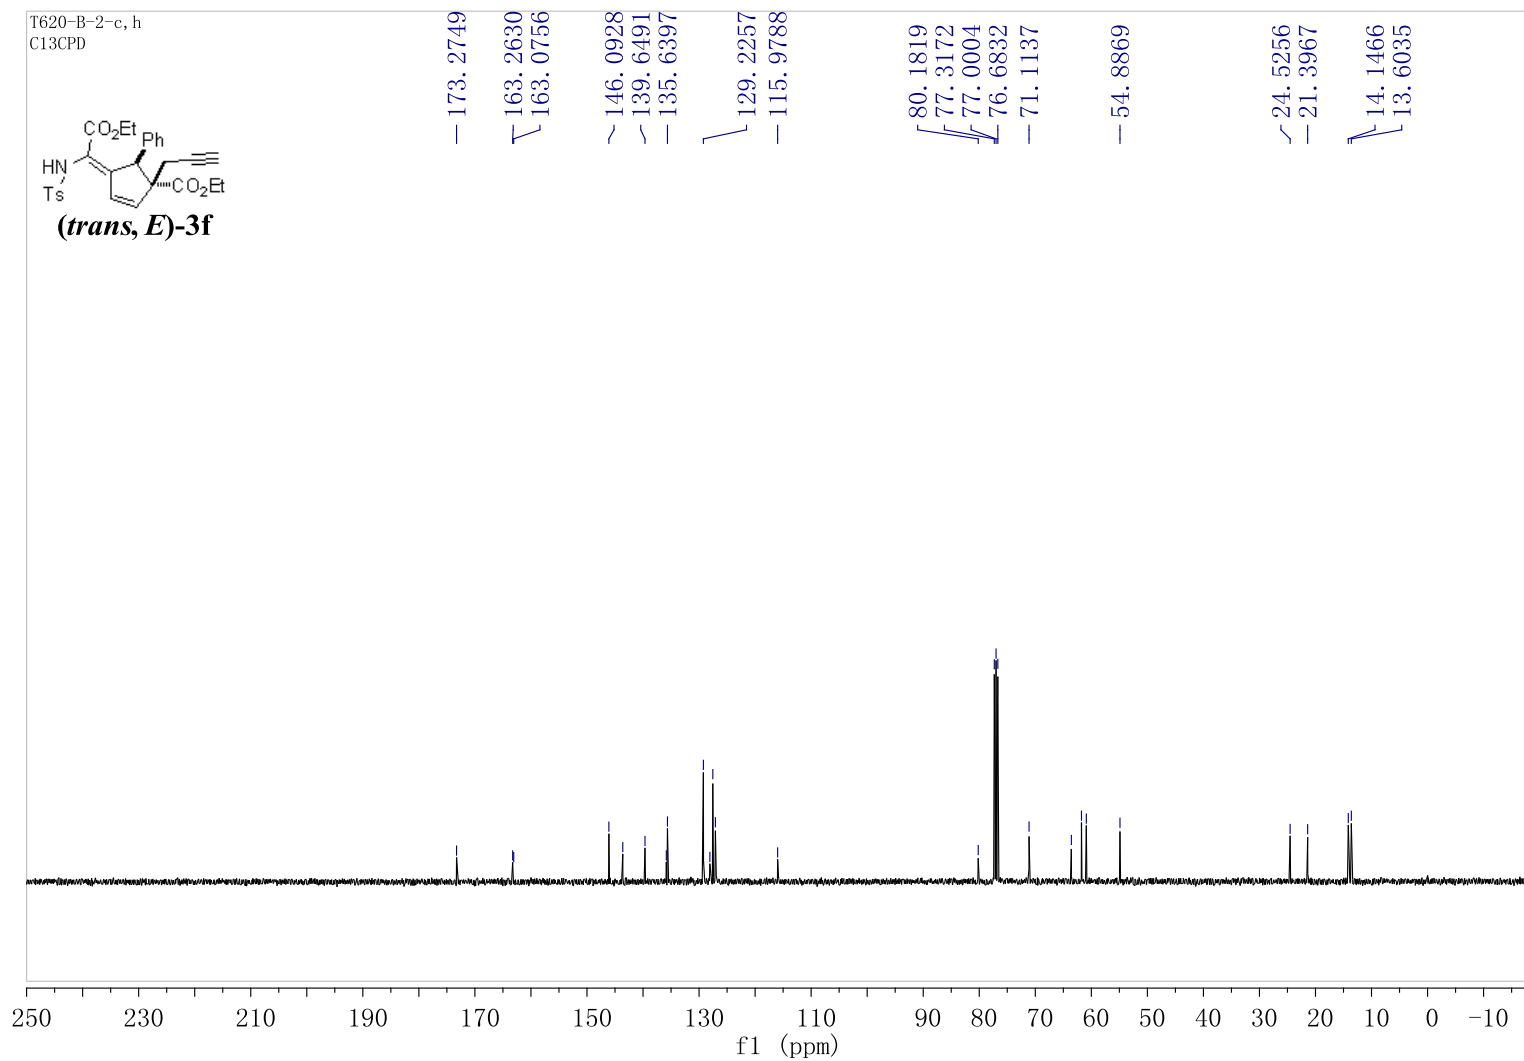

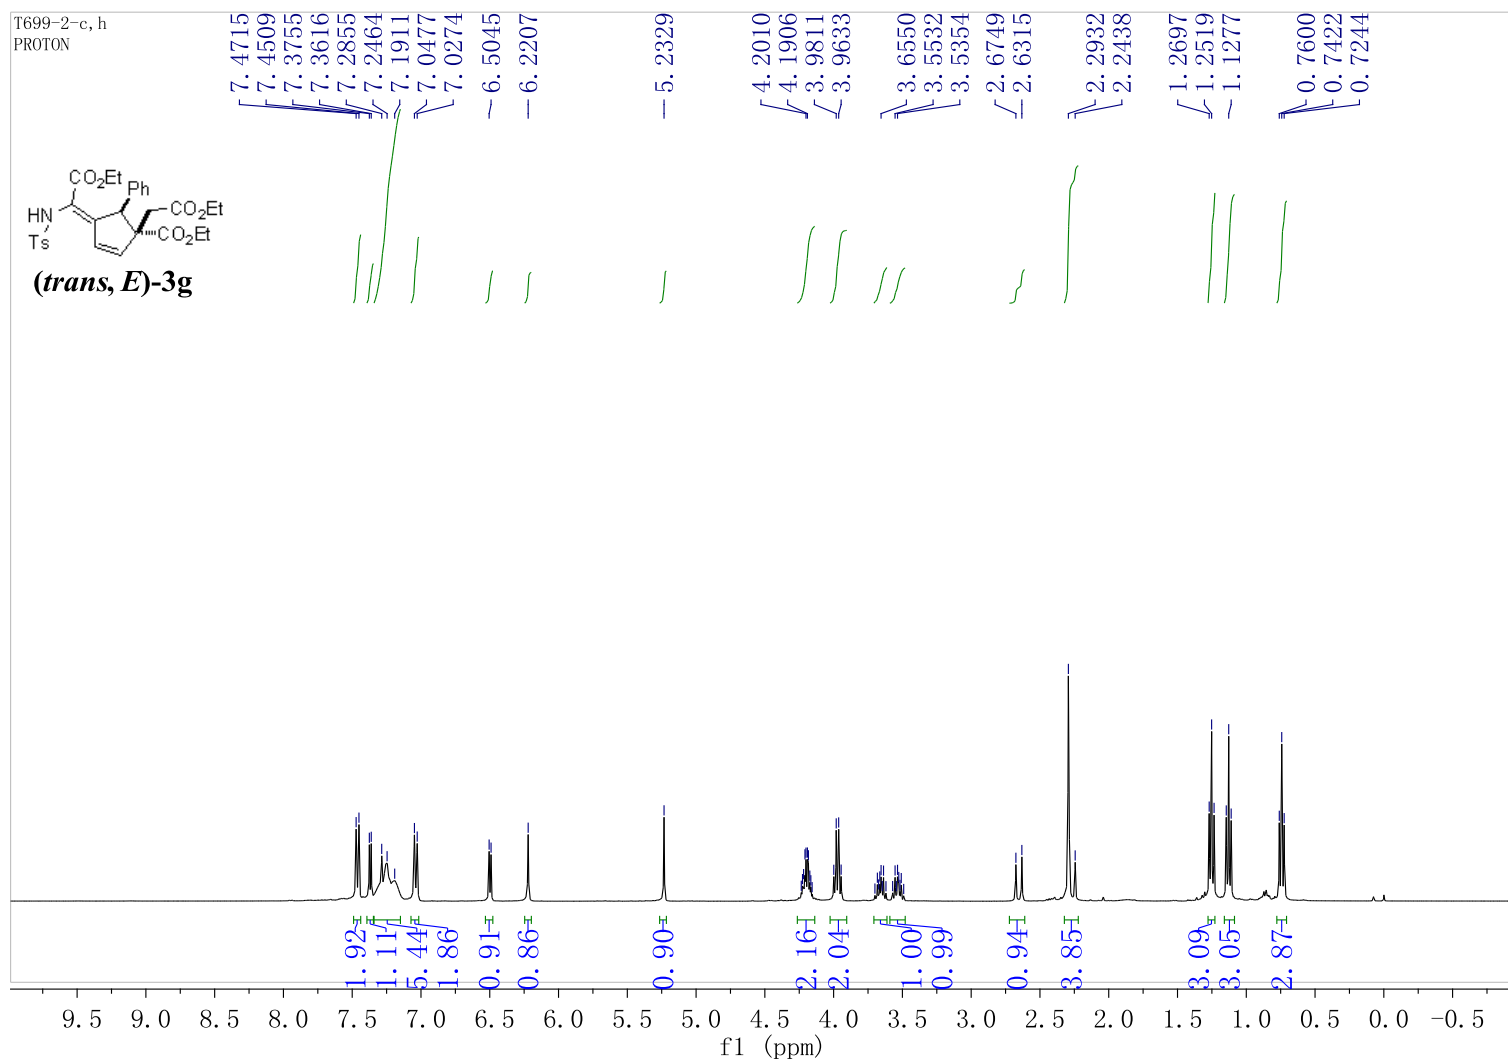

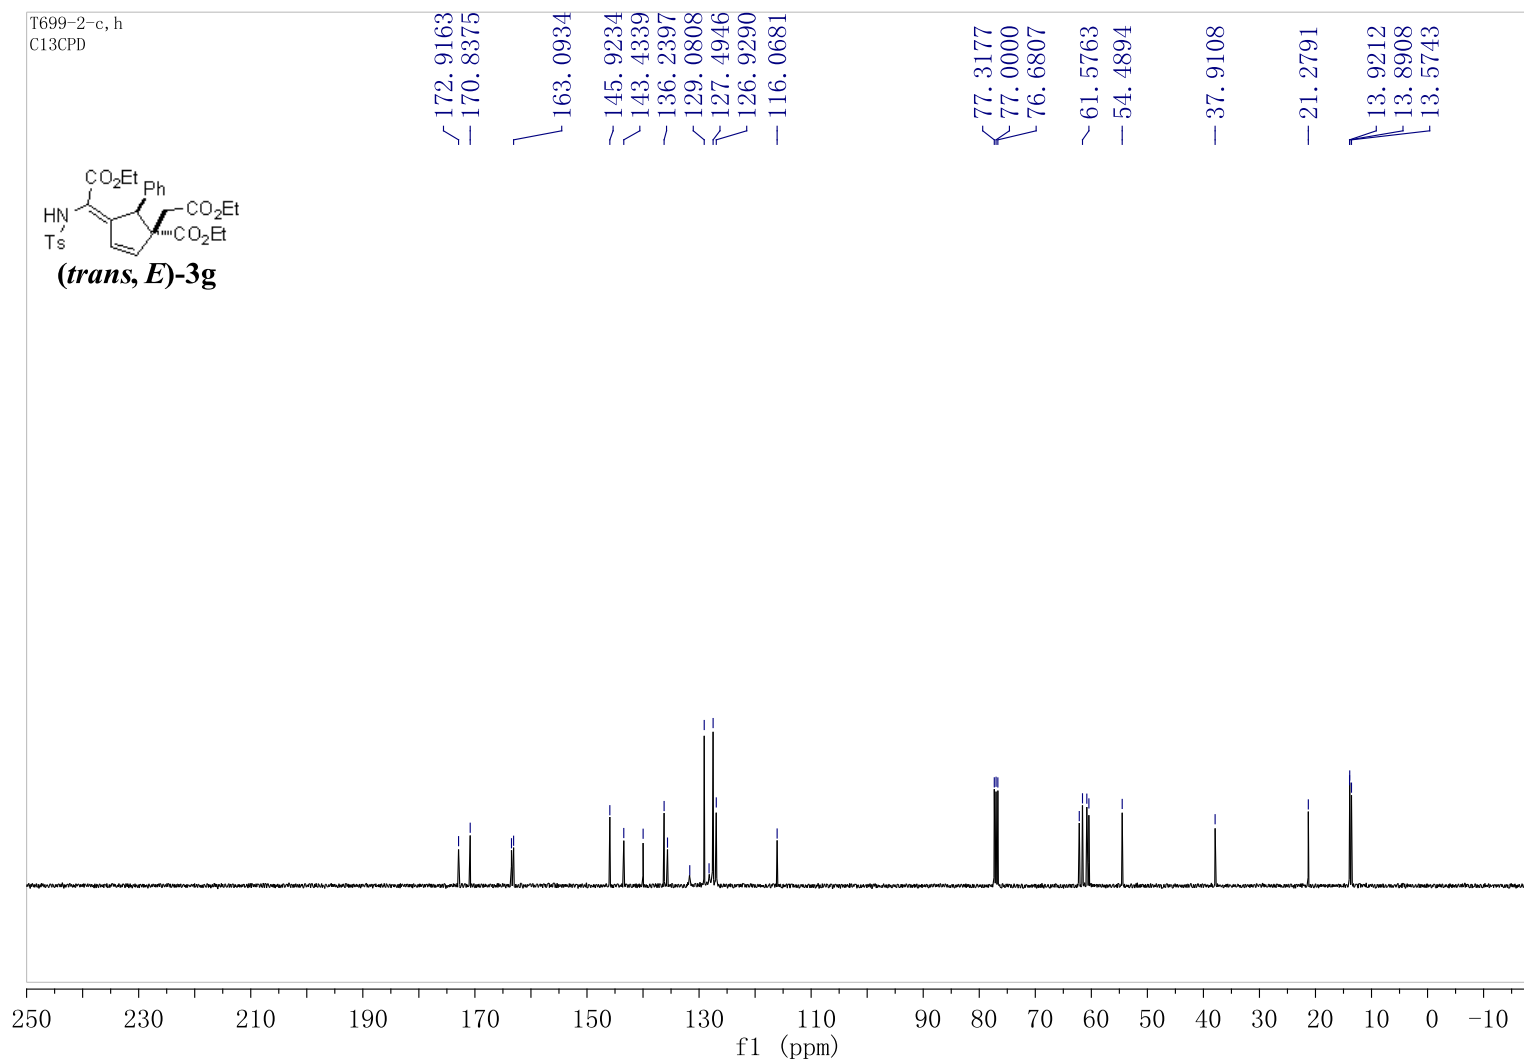

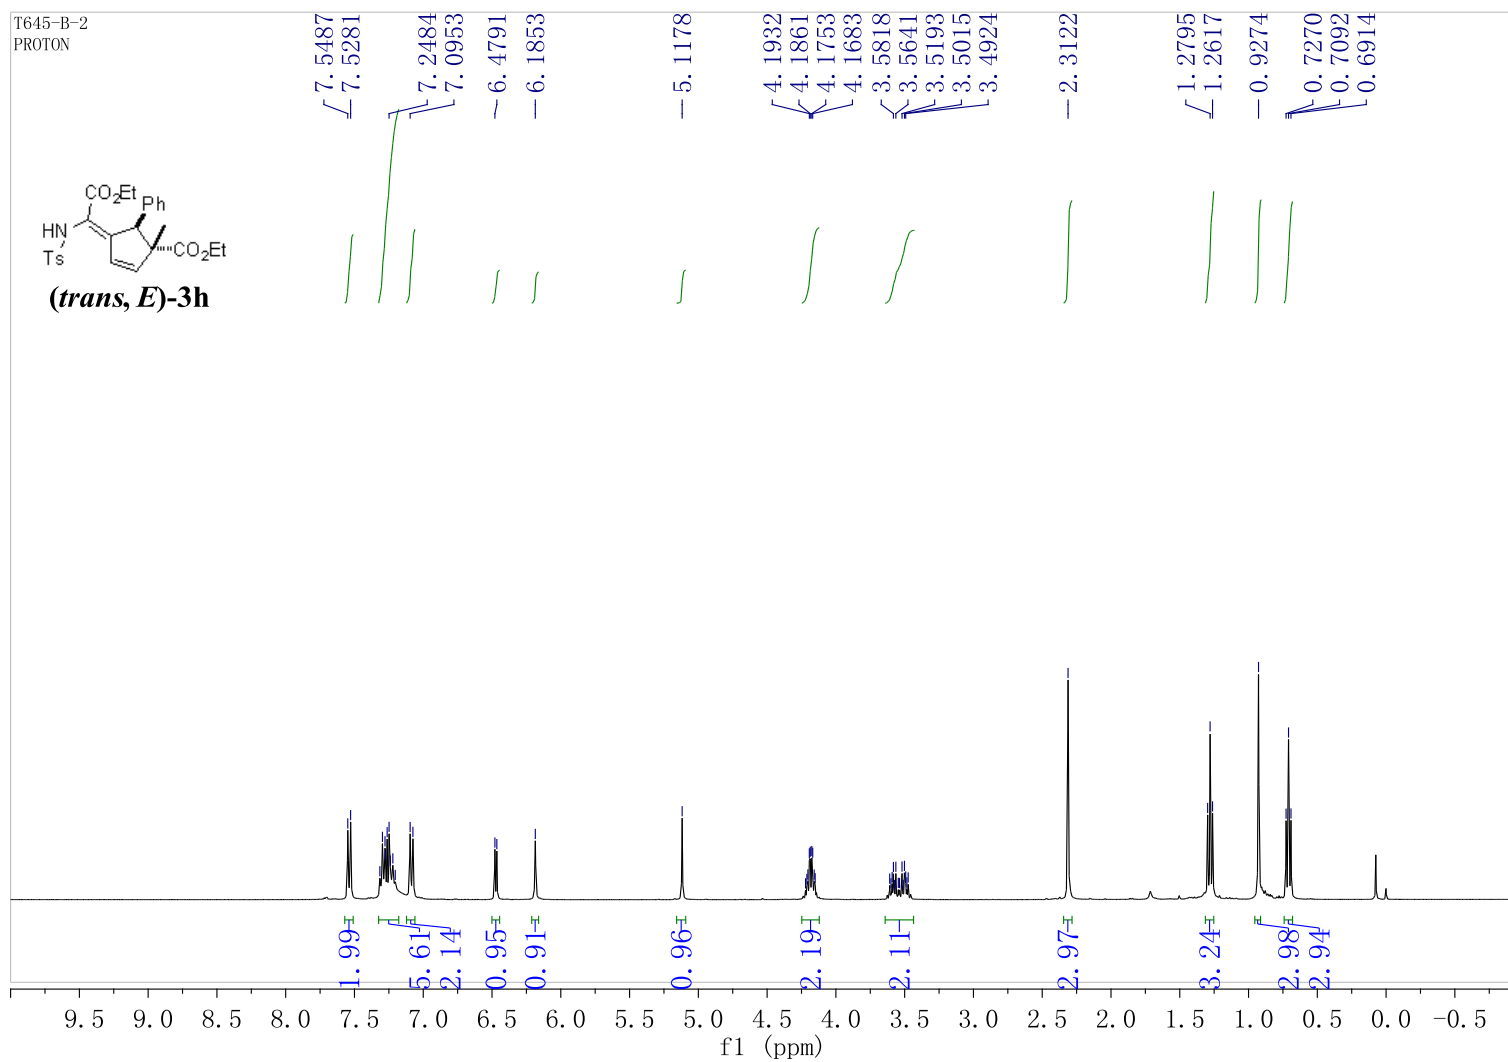

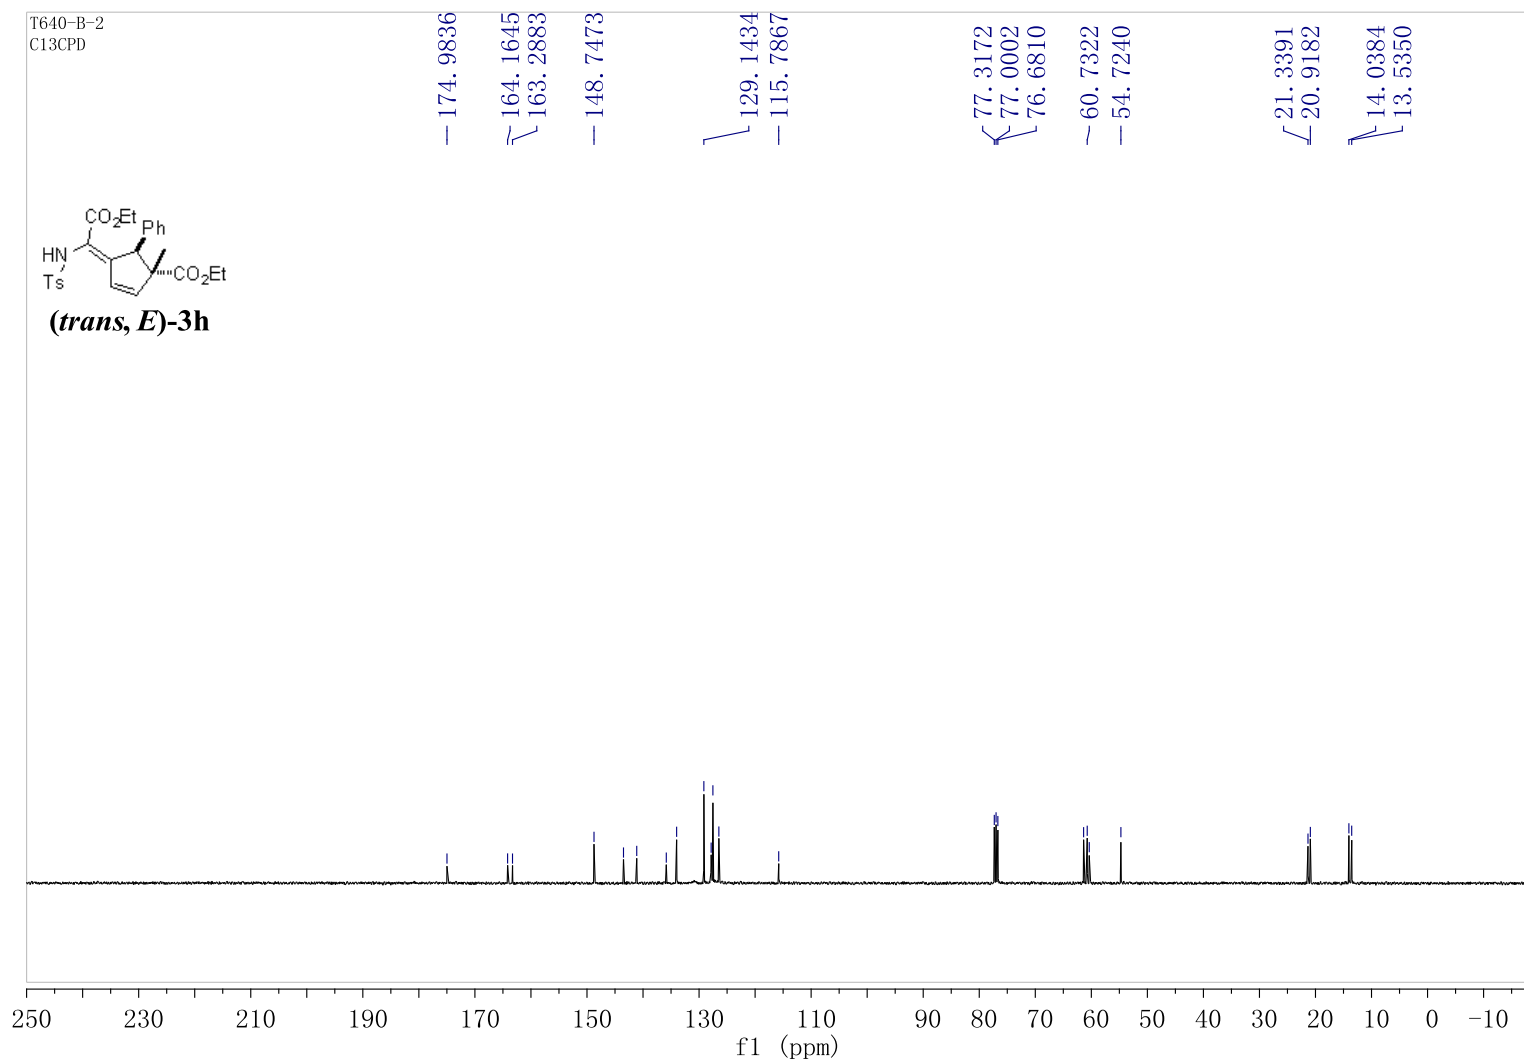

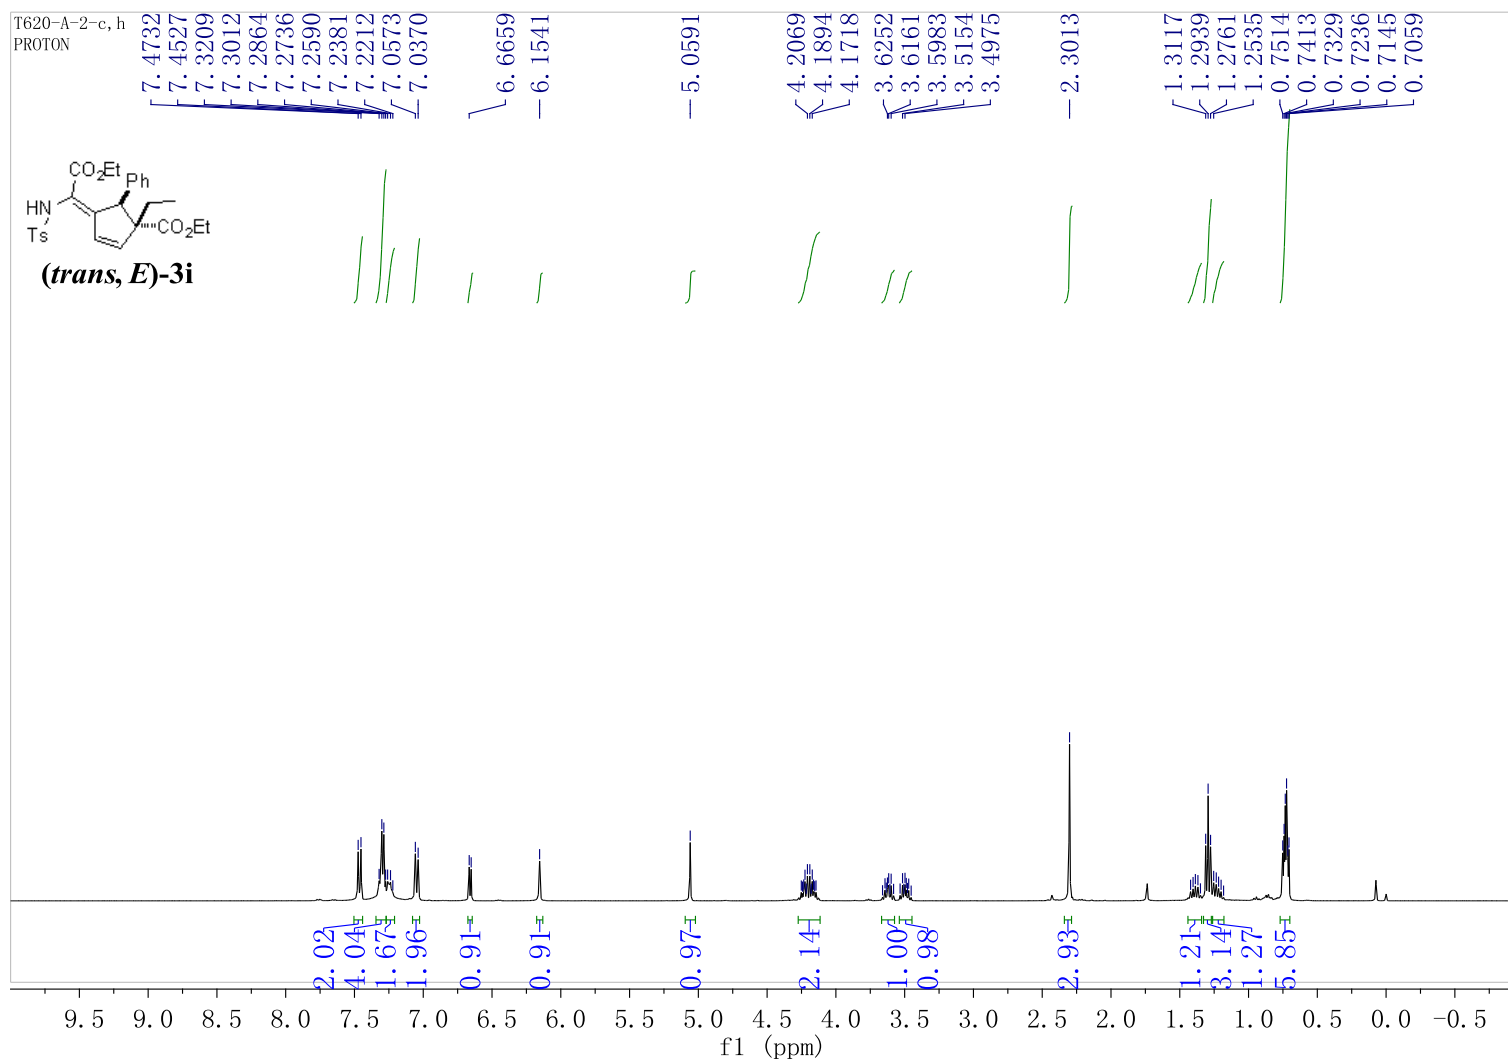



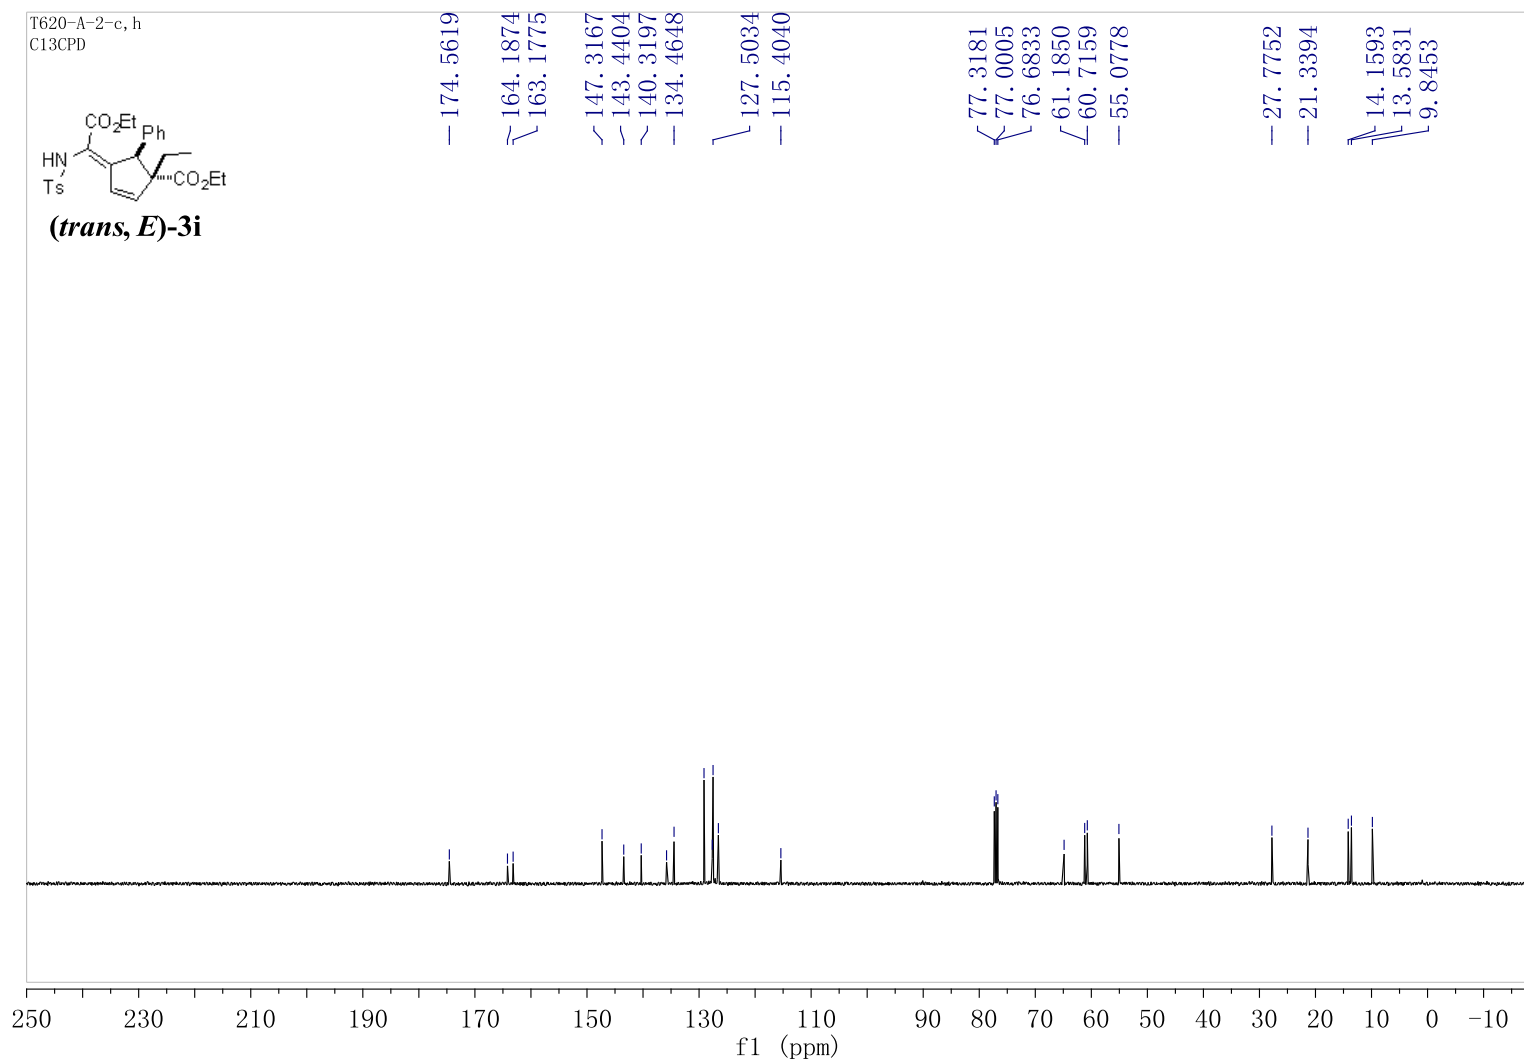

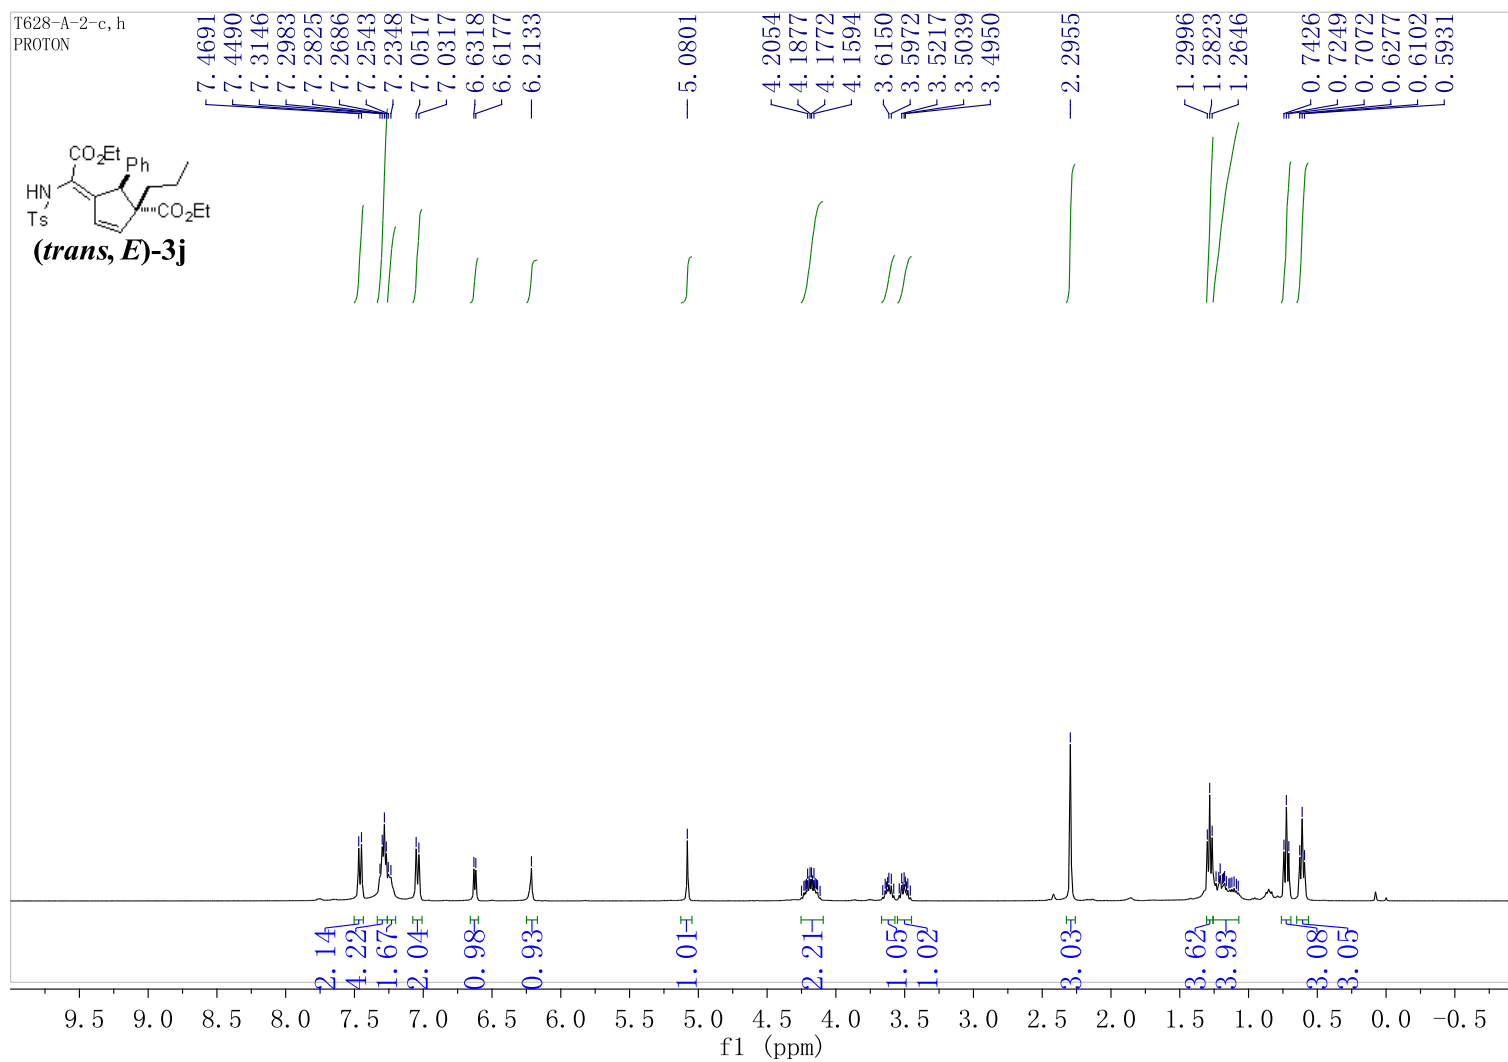

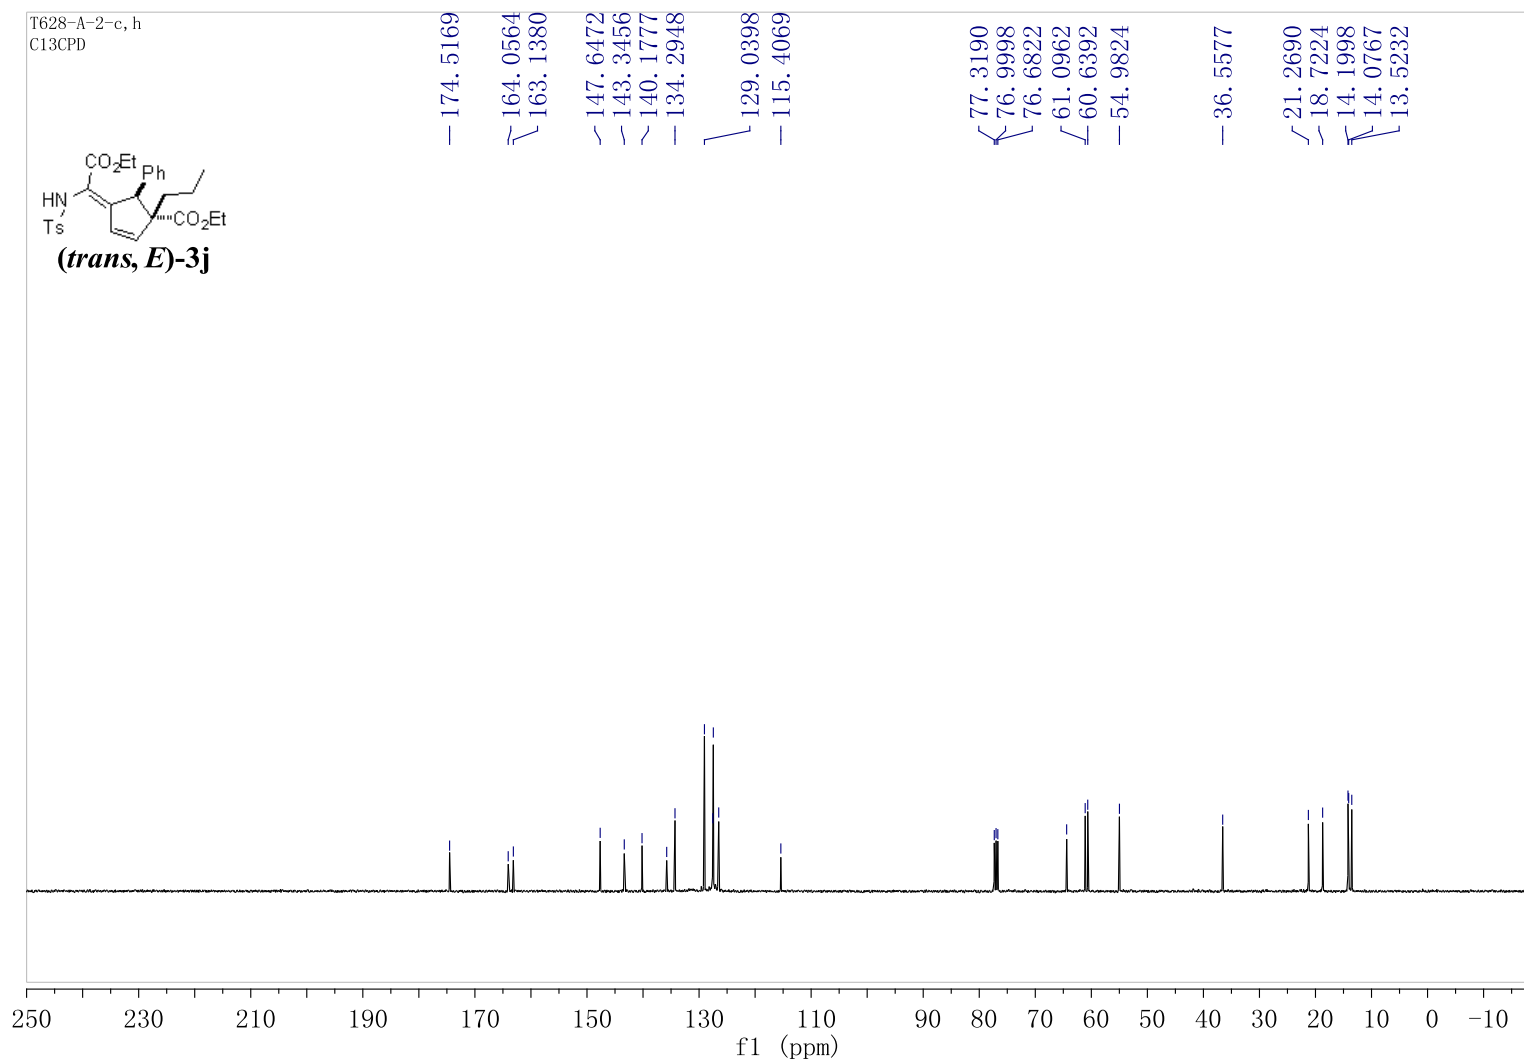

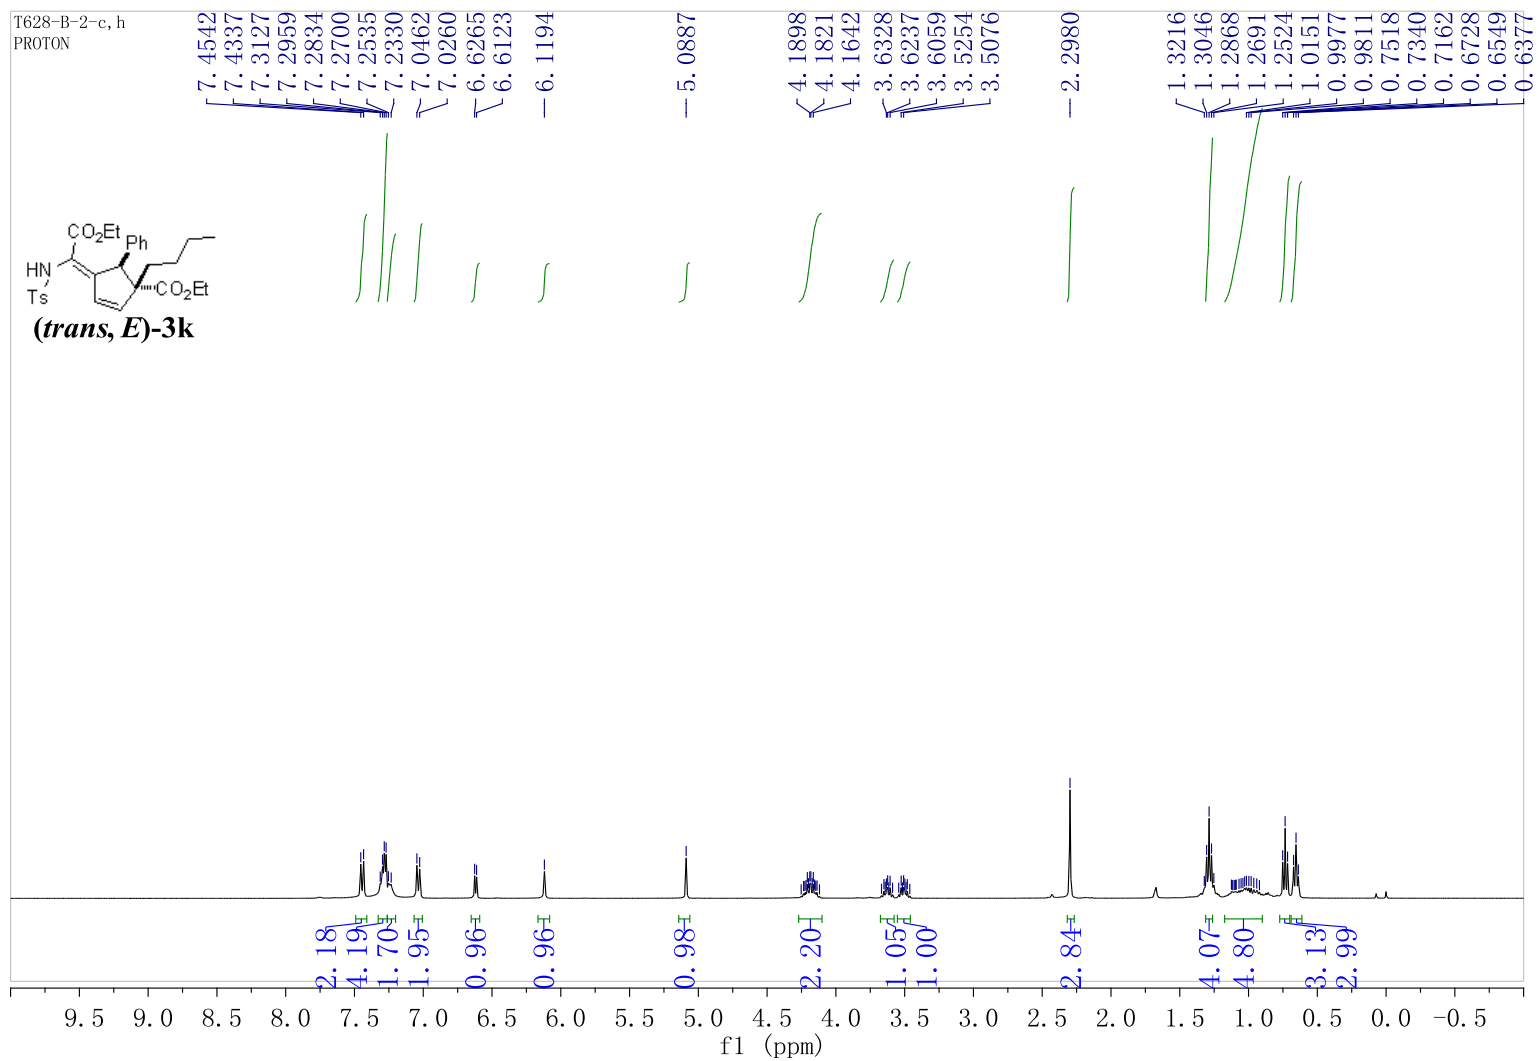

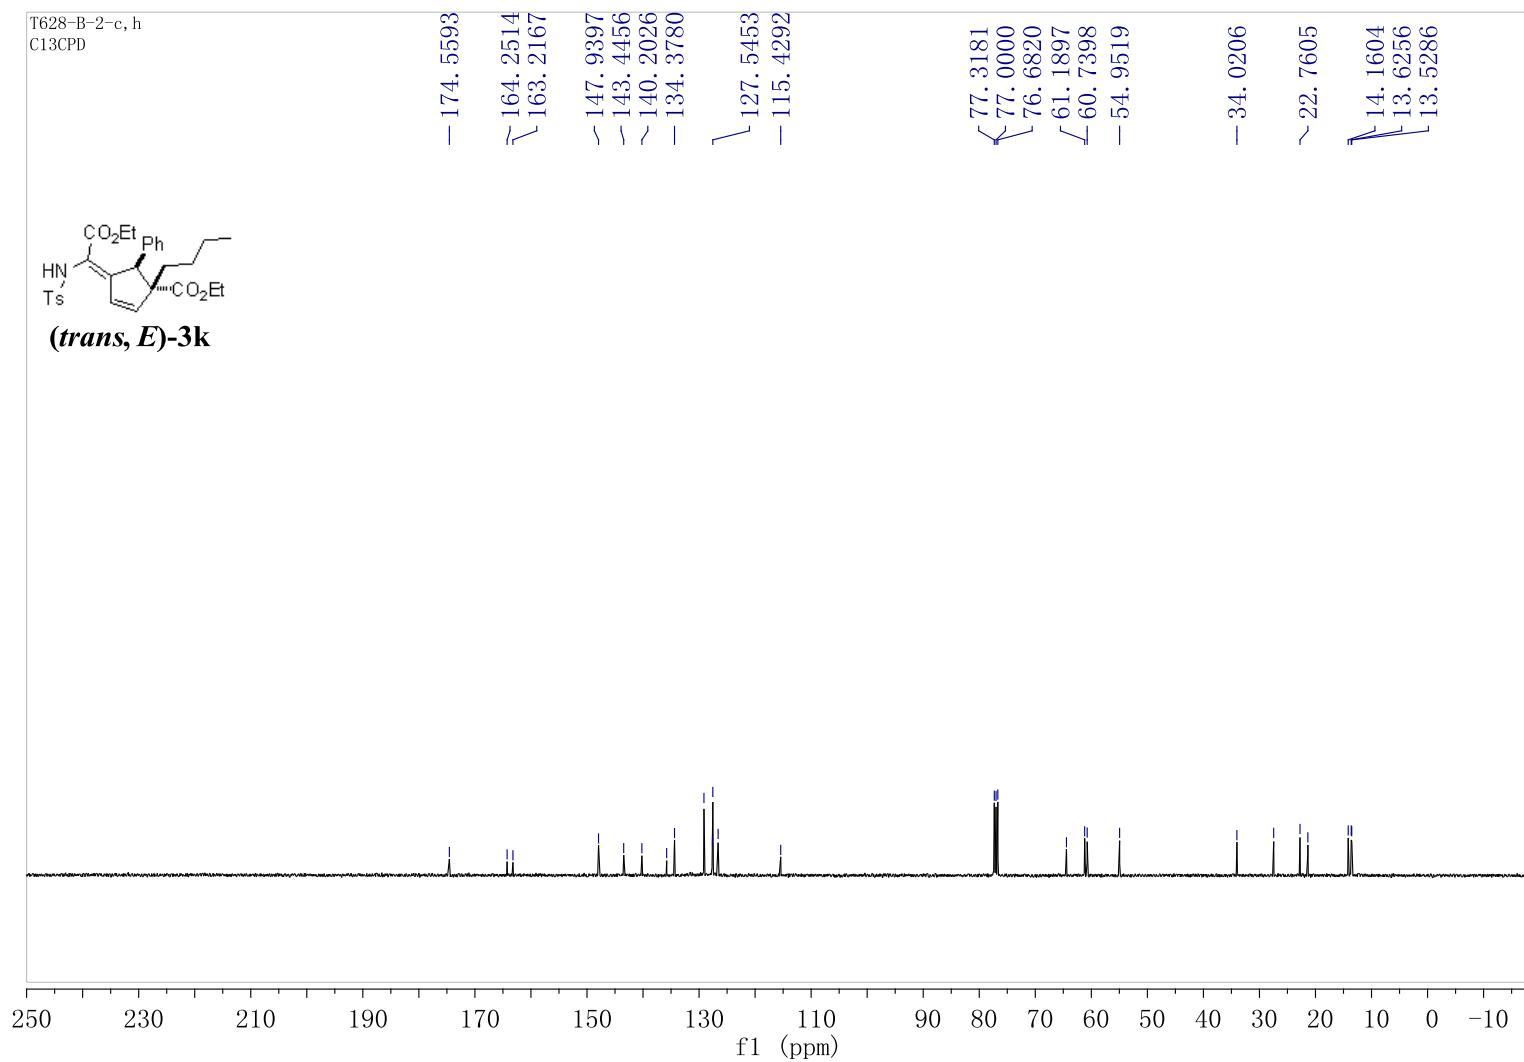

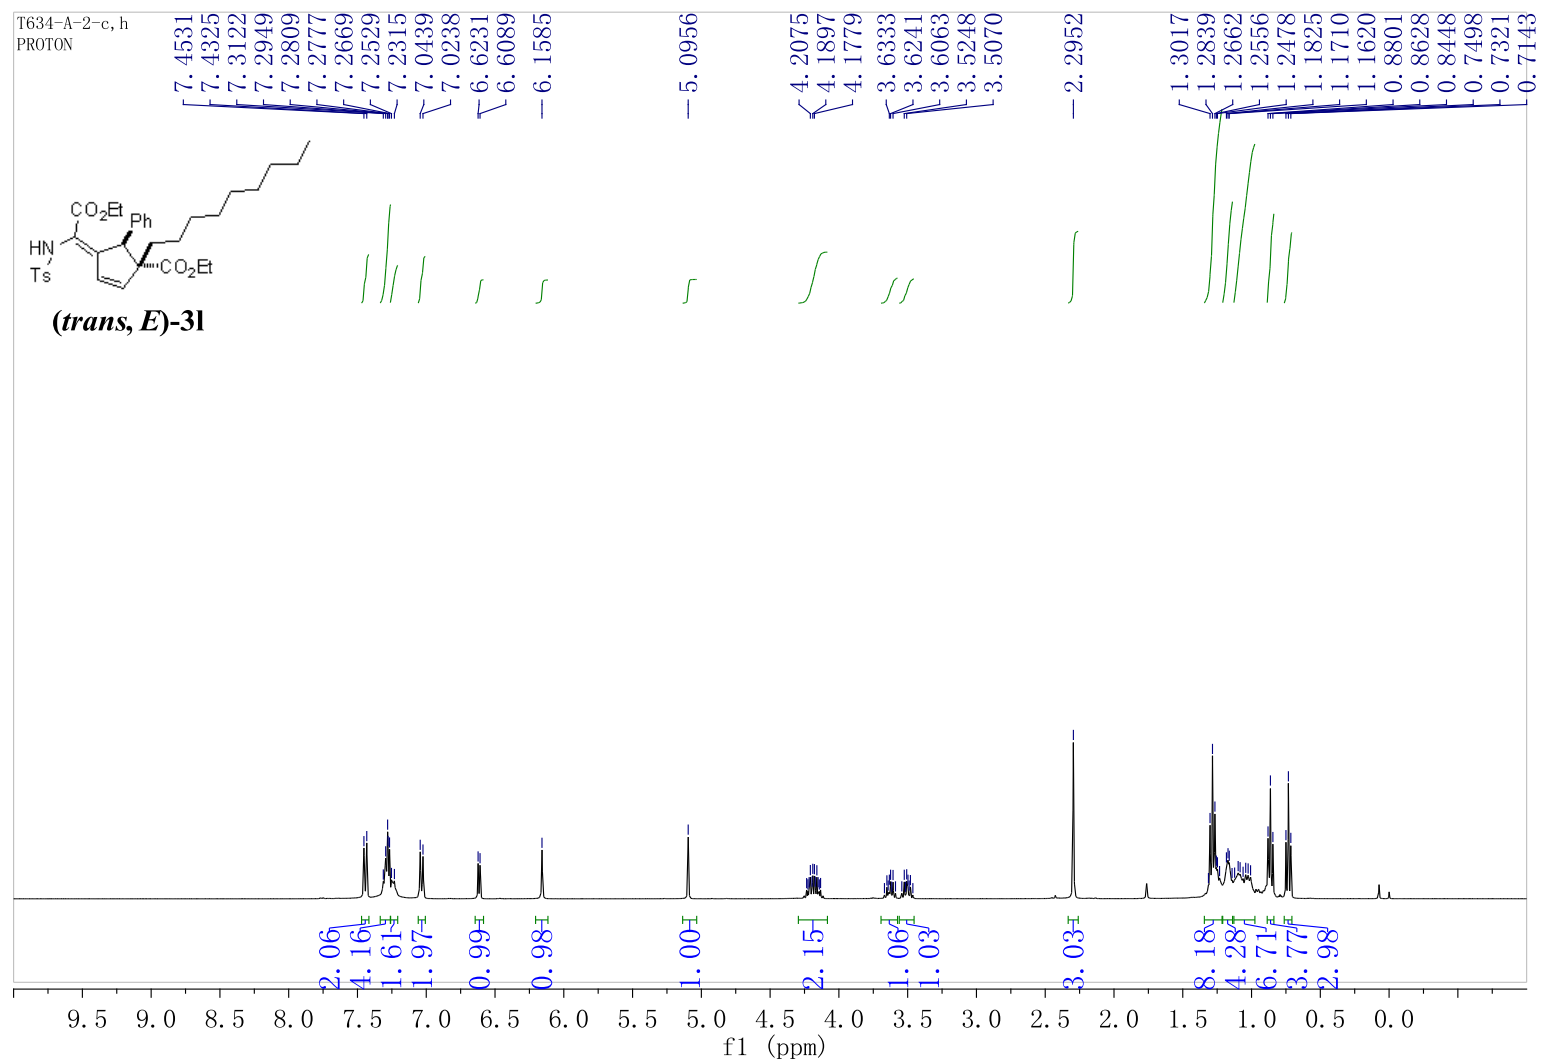

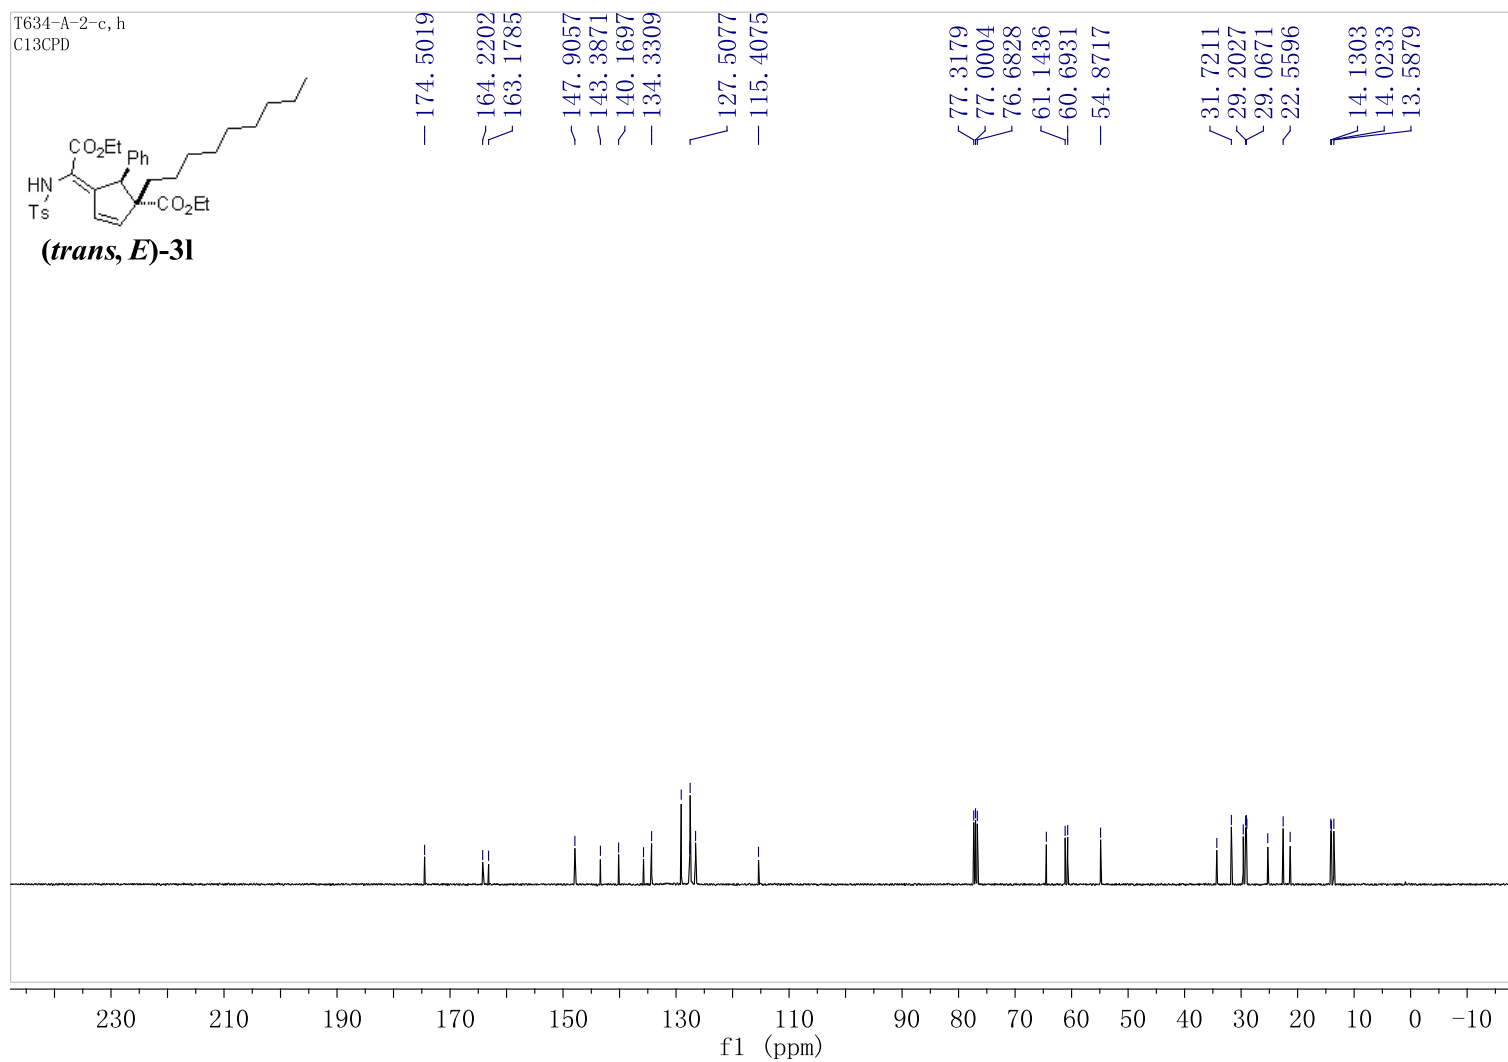

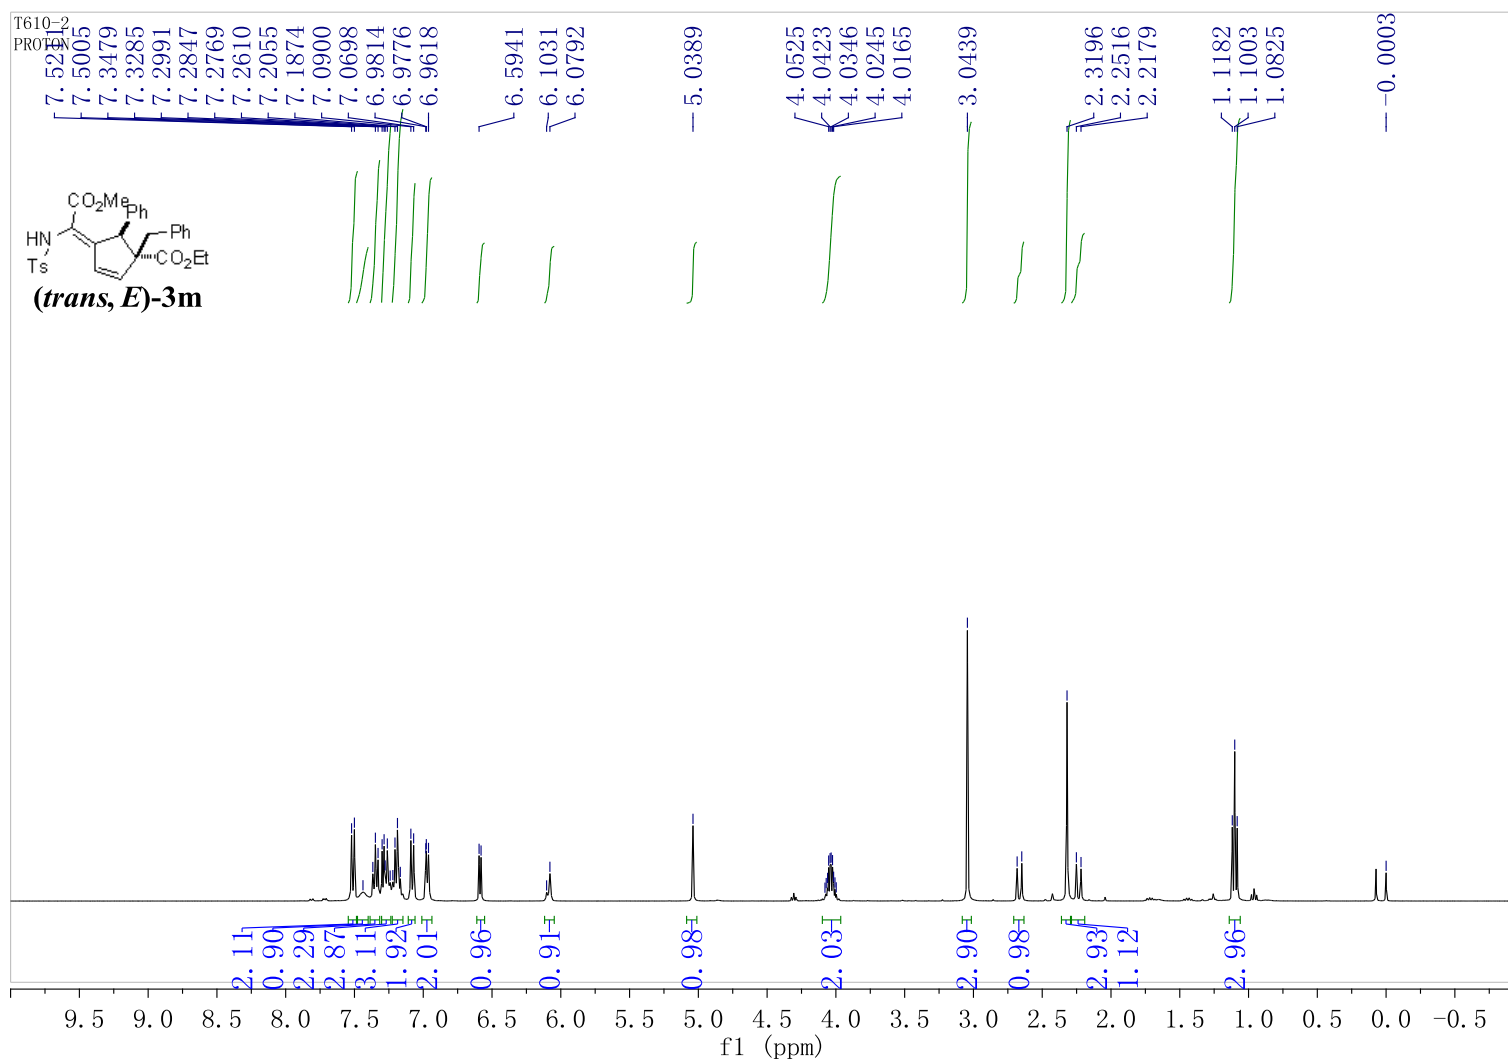



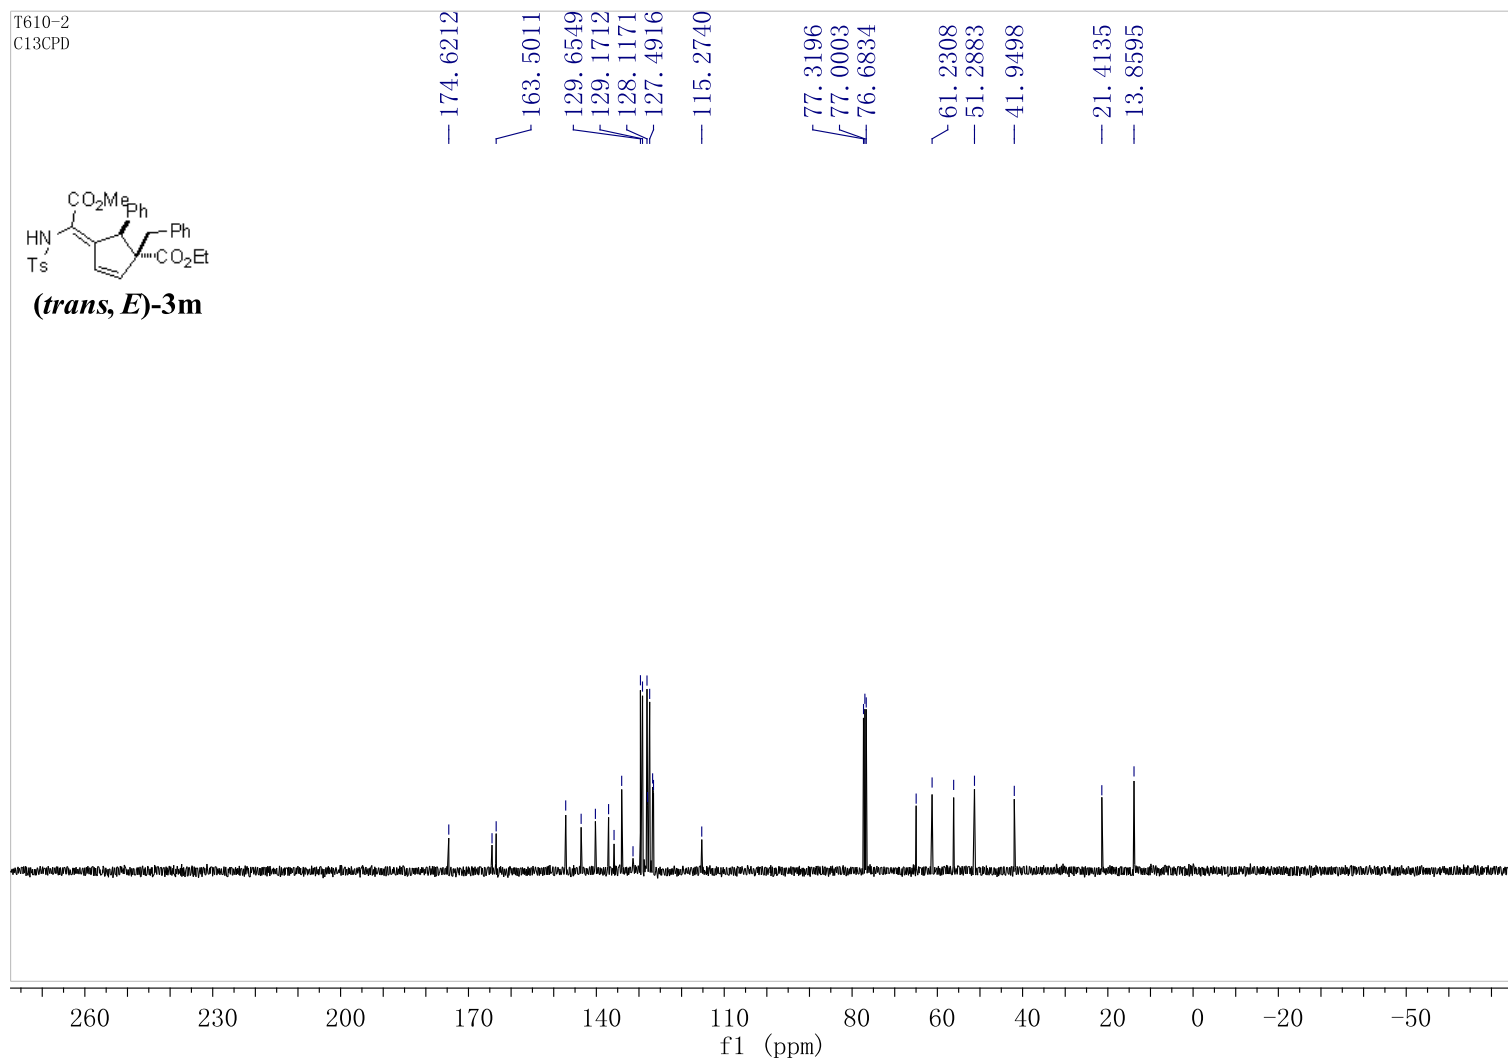

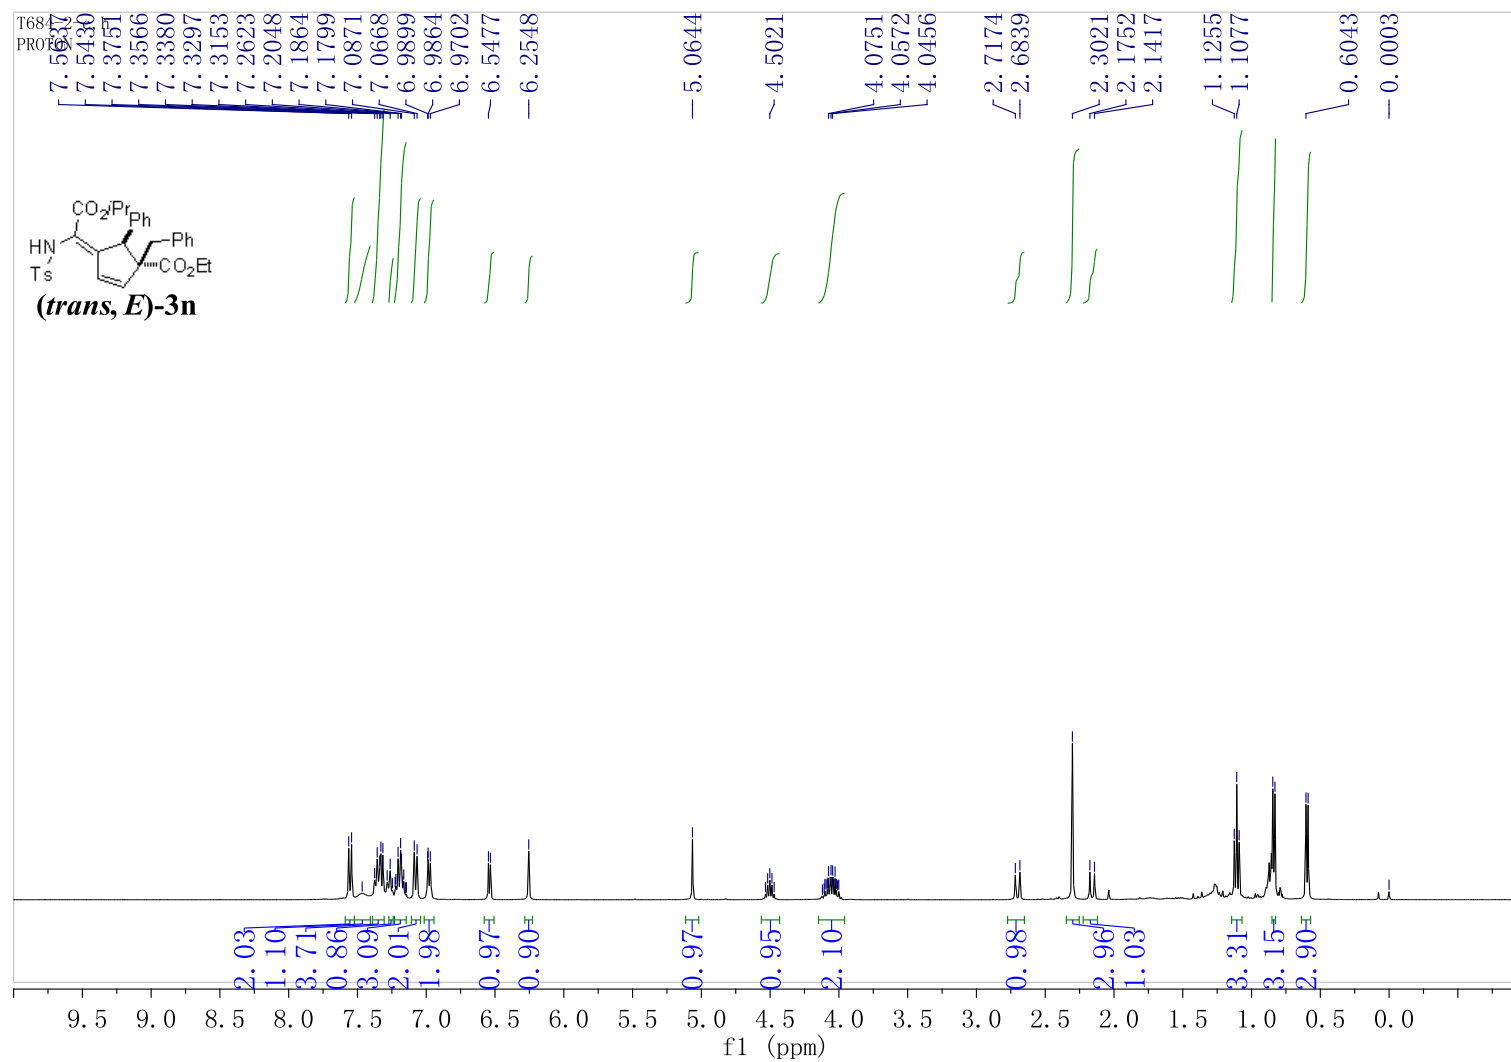

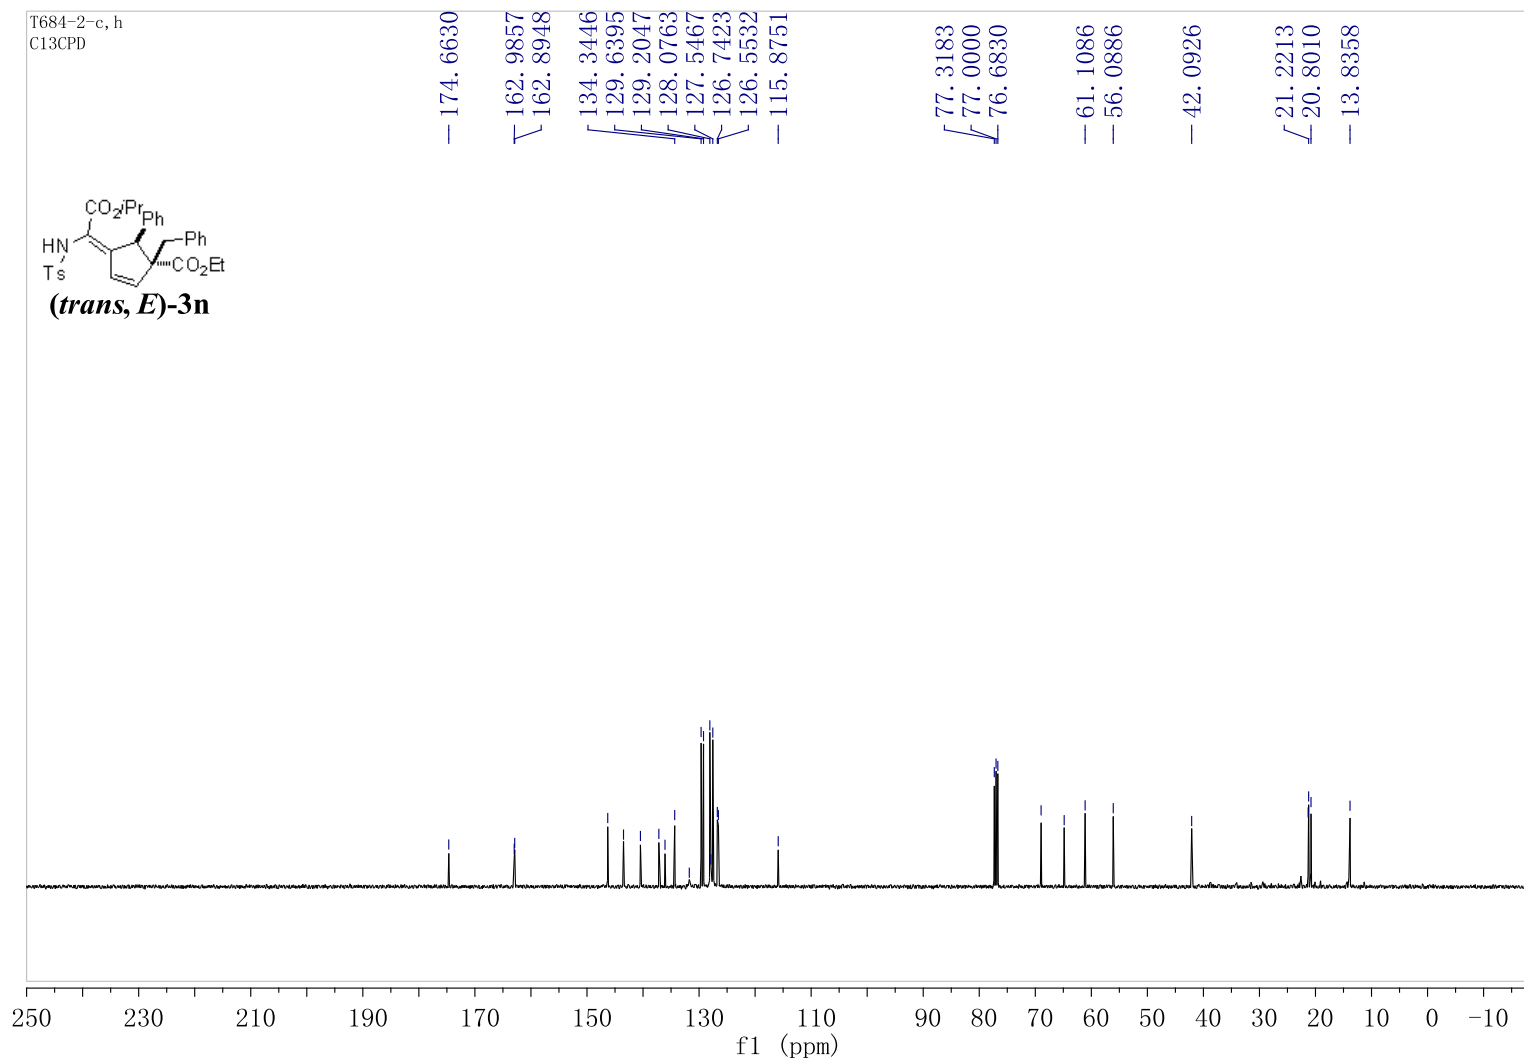

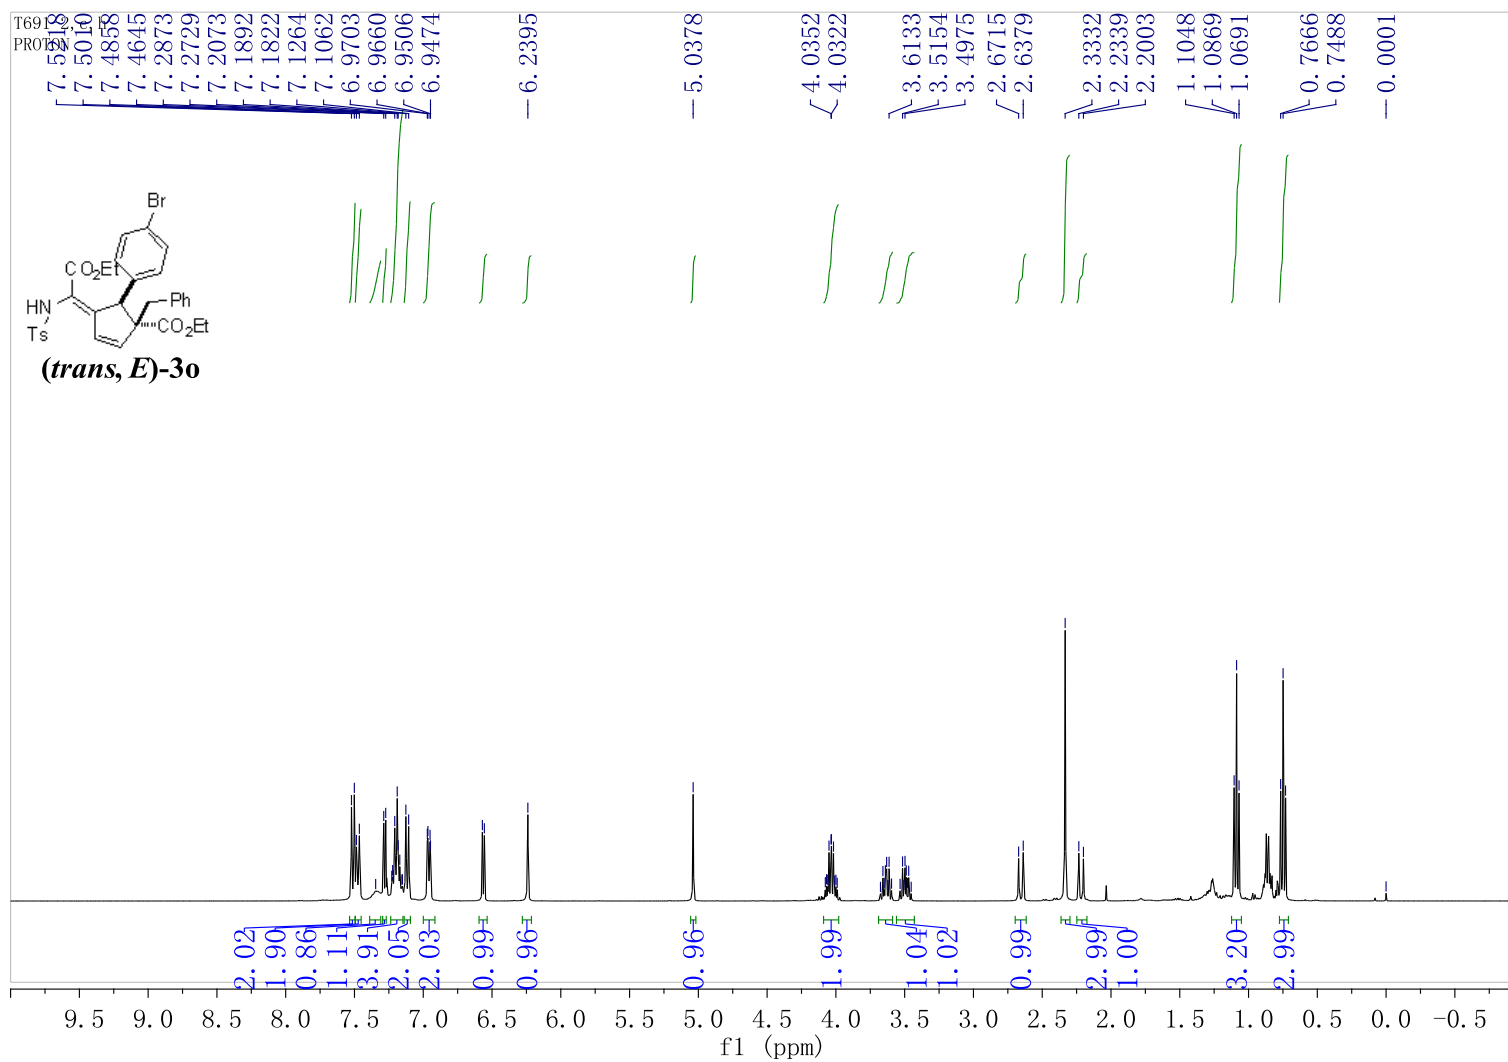

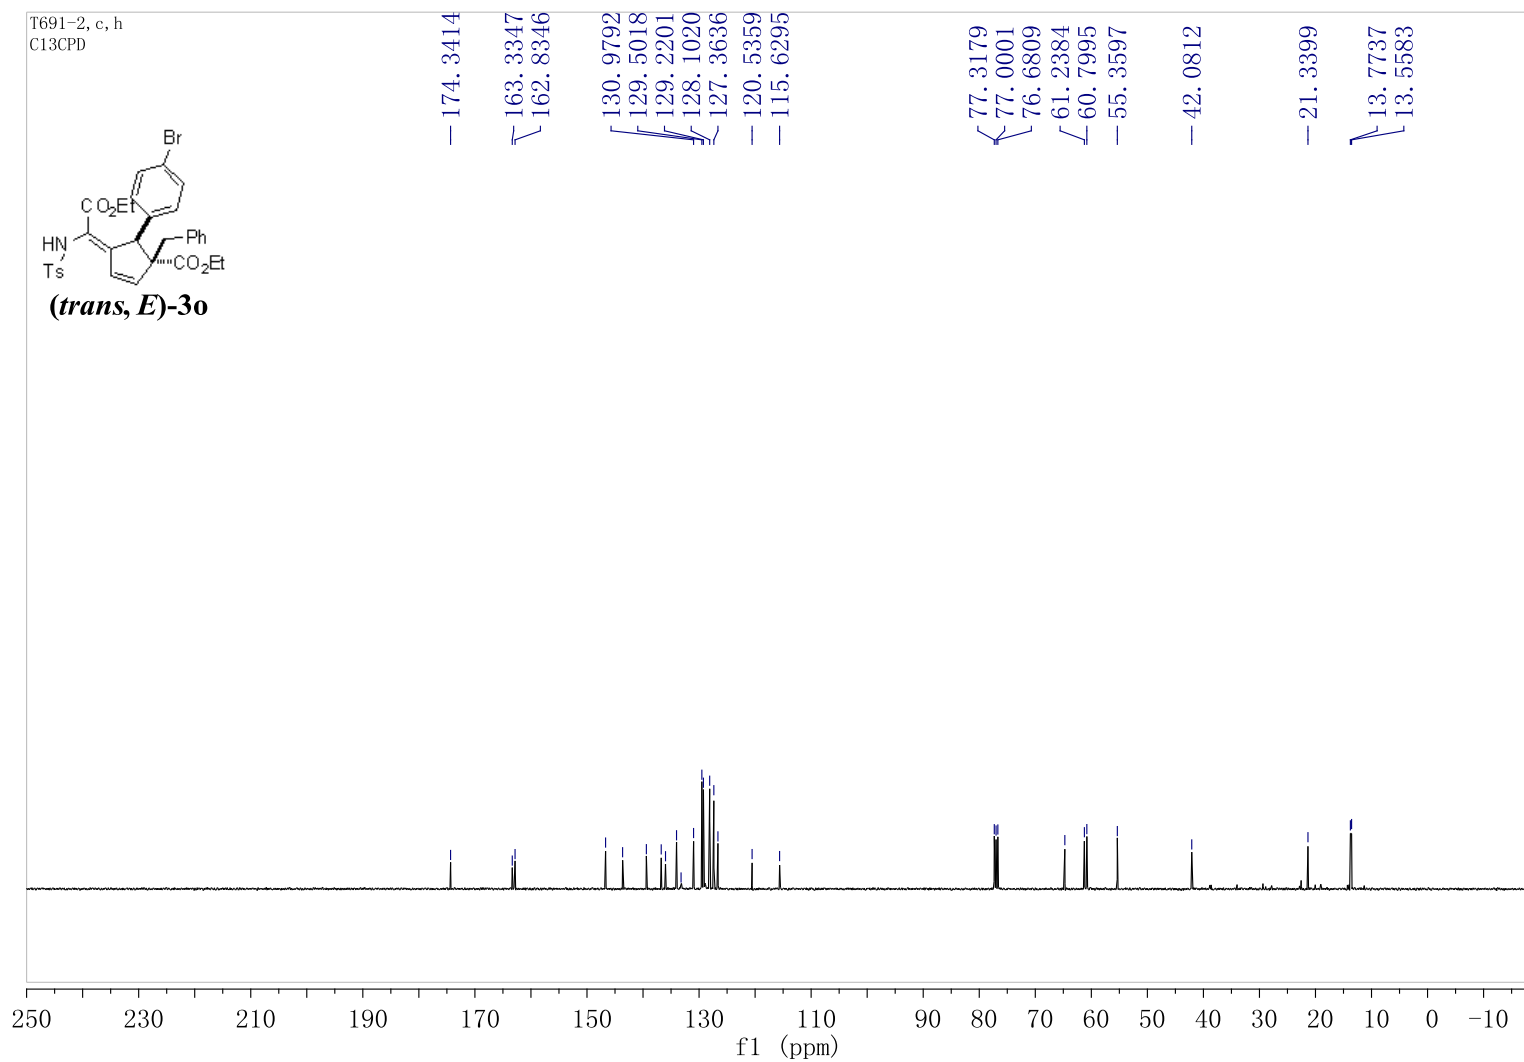

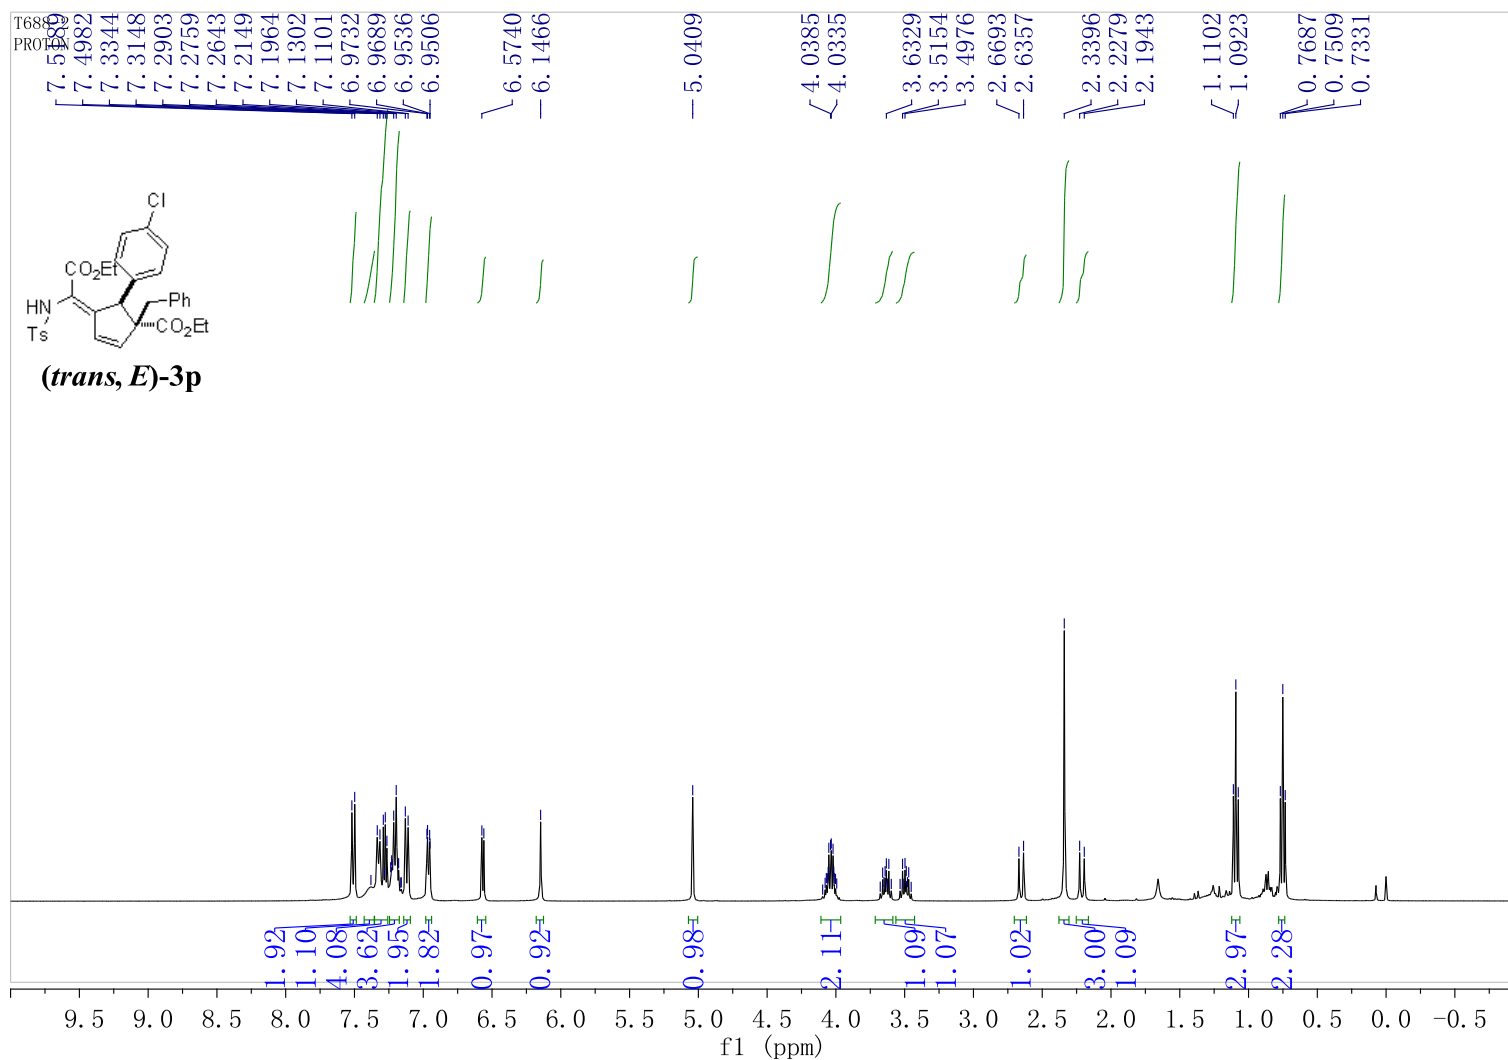

错误! 不能通过编辑域代码创建对象。

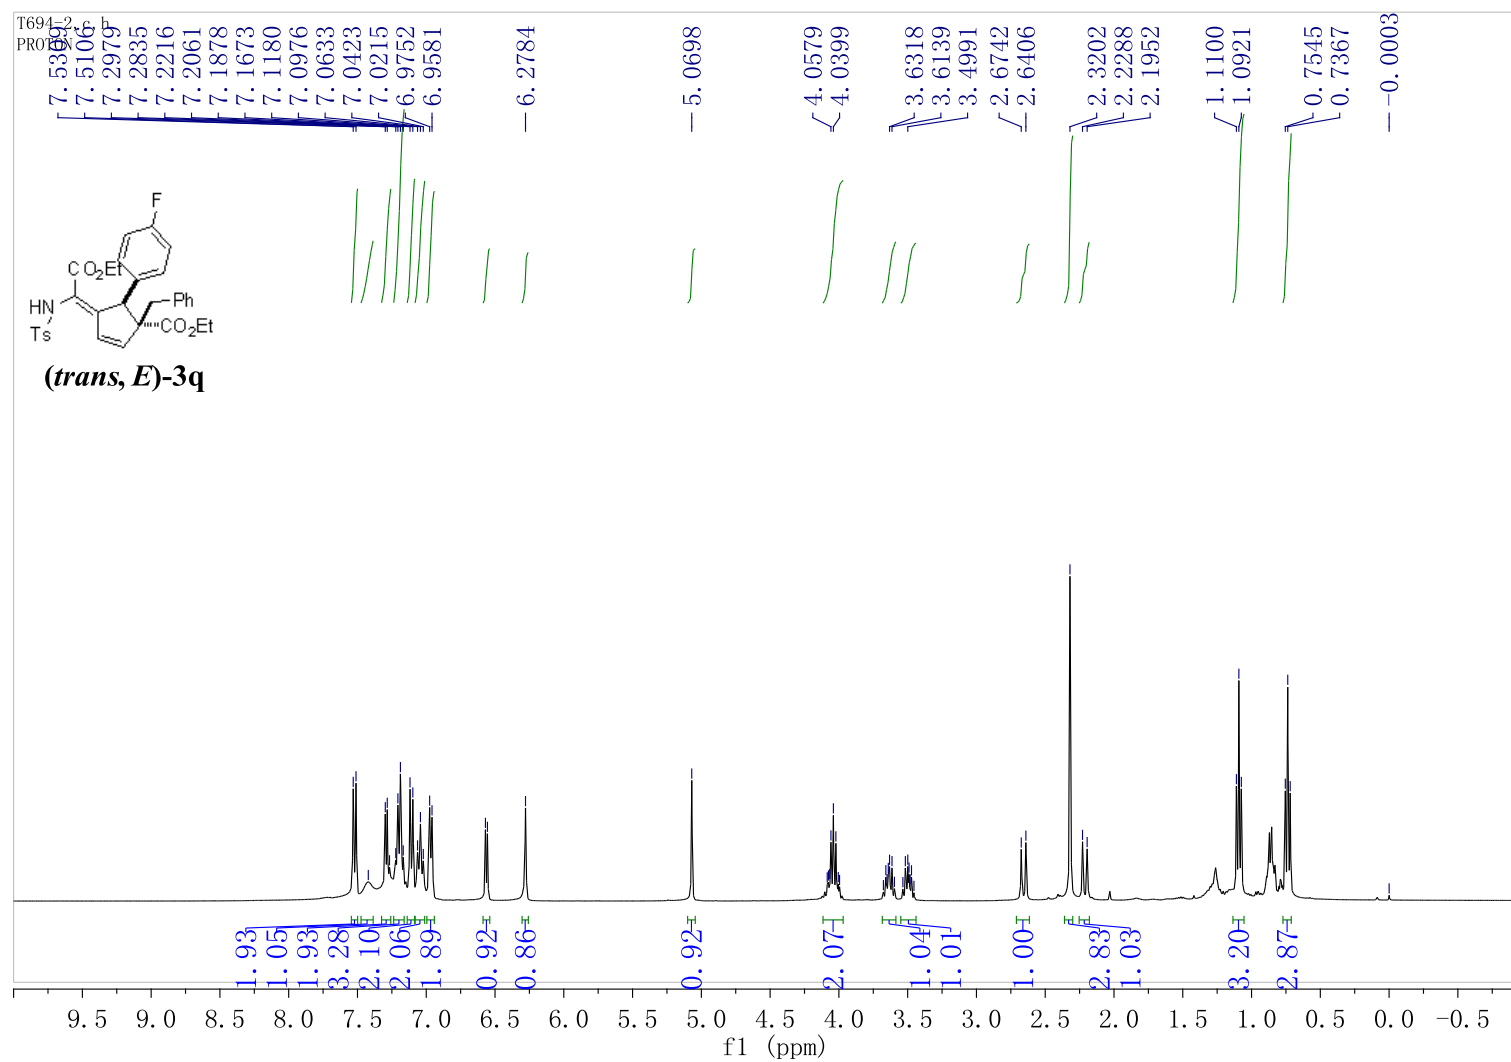



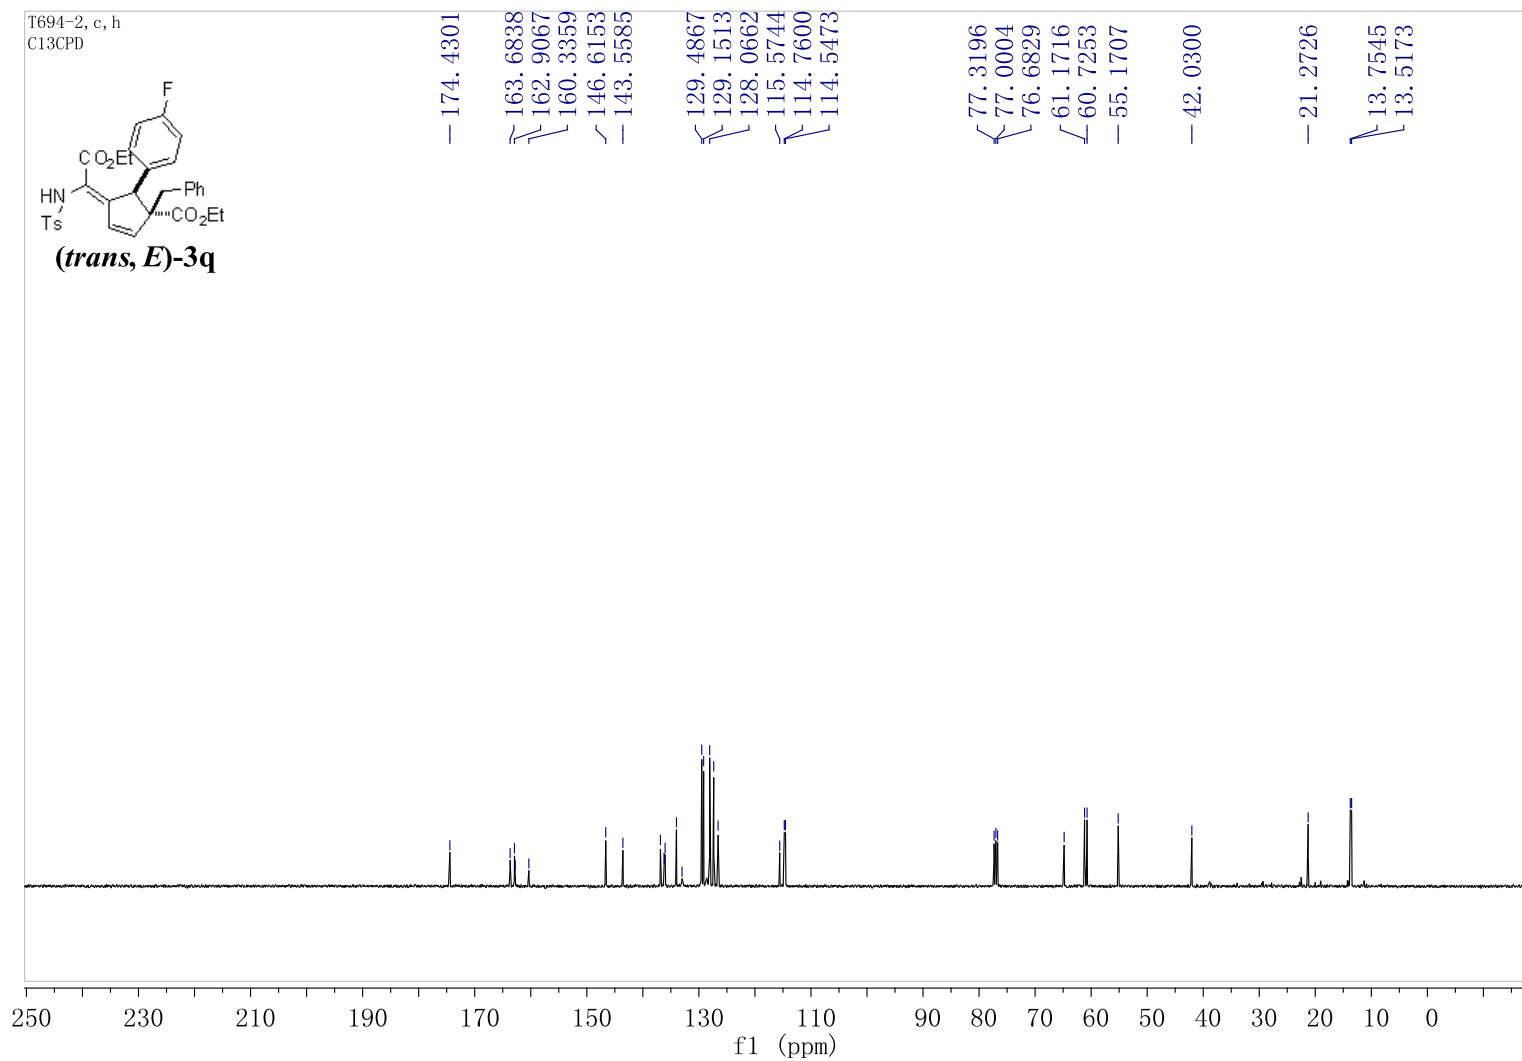

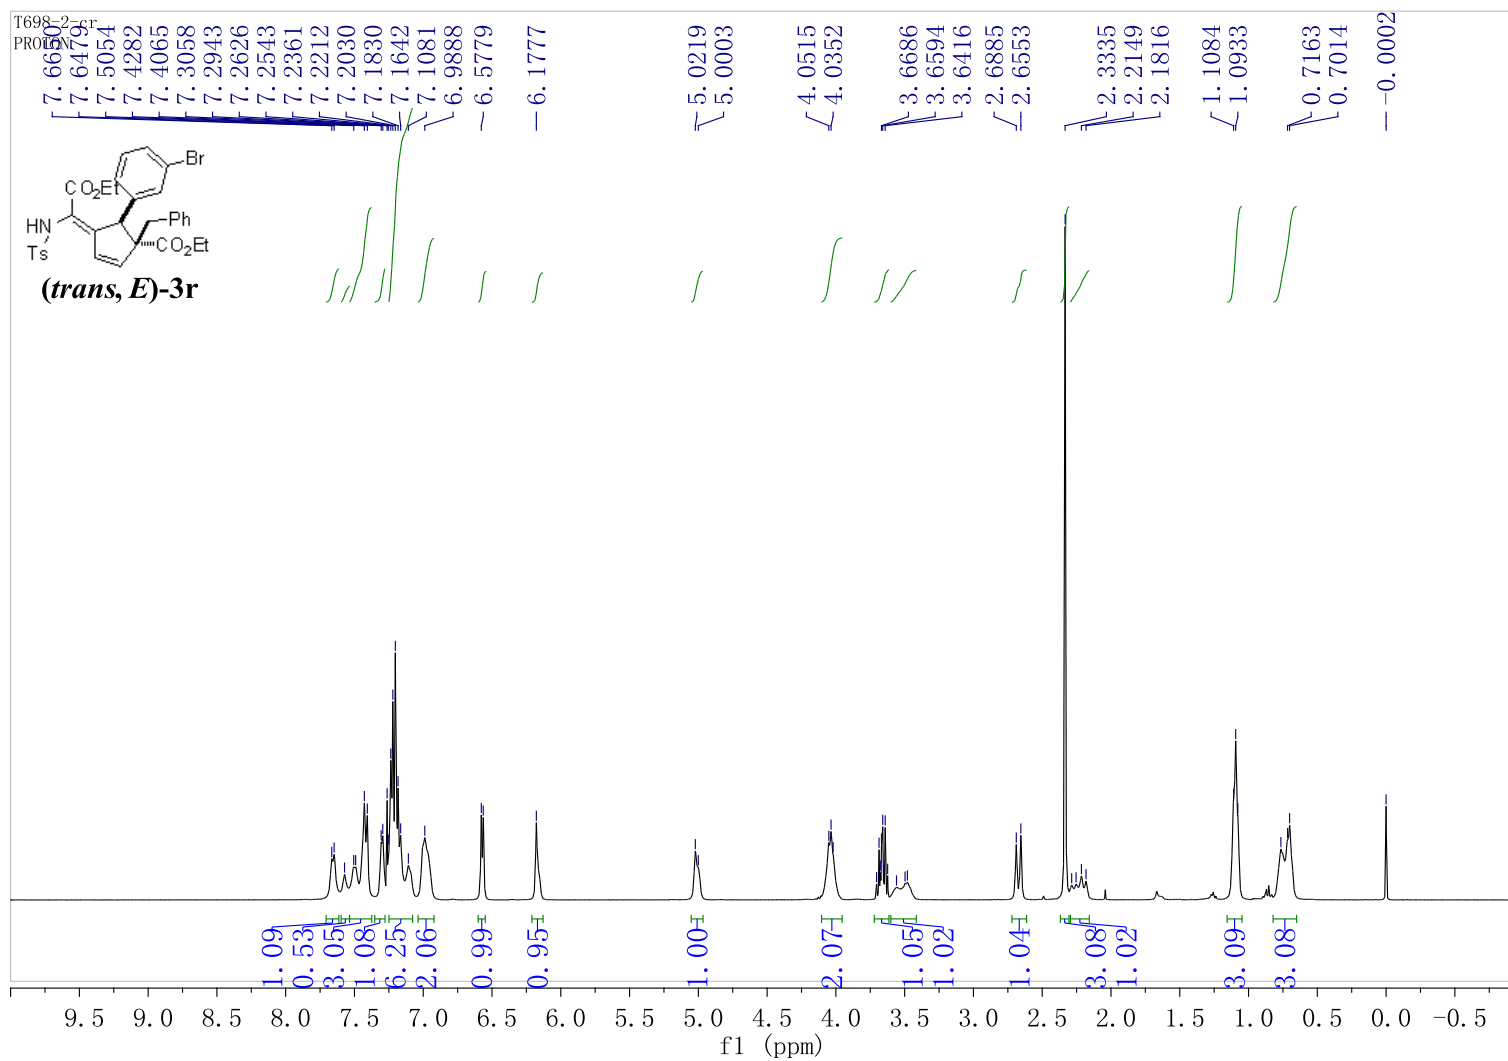

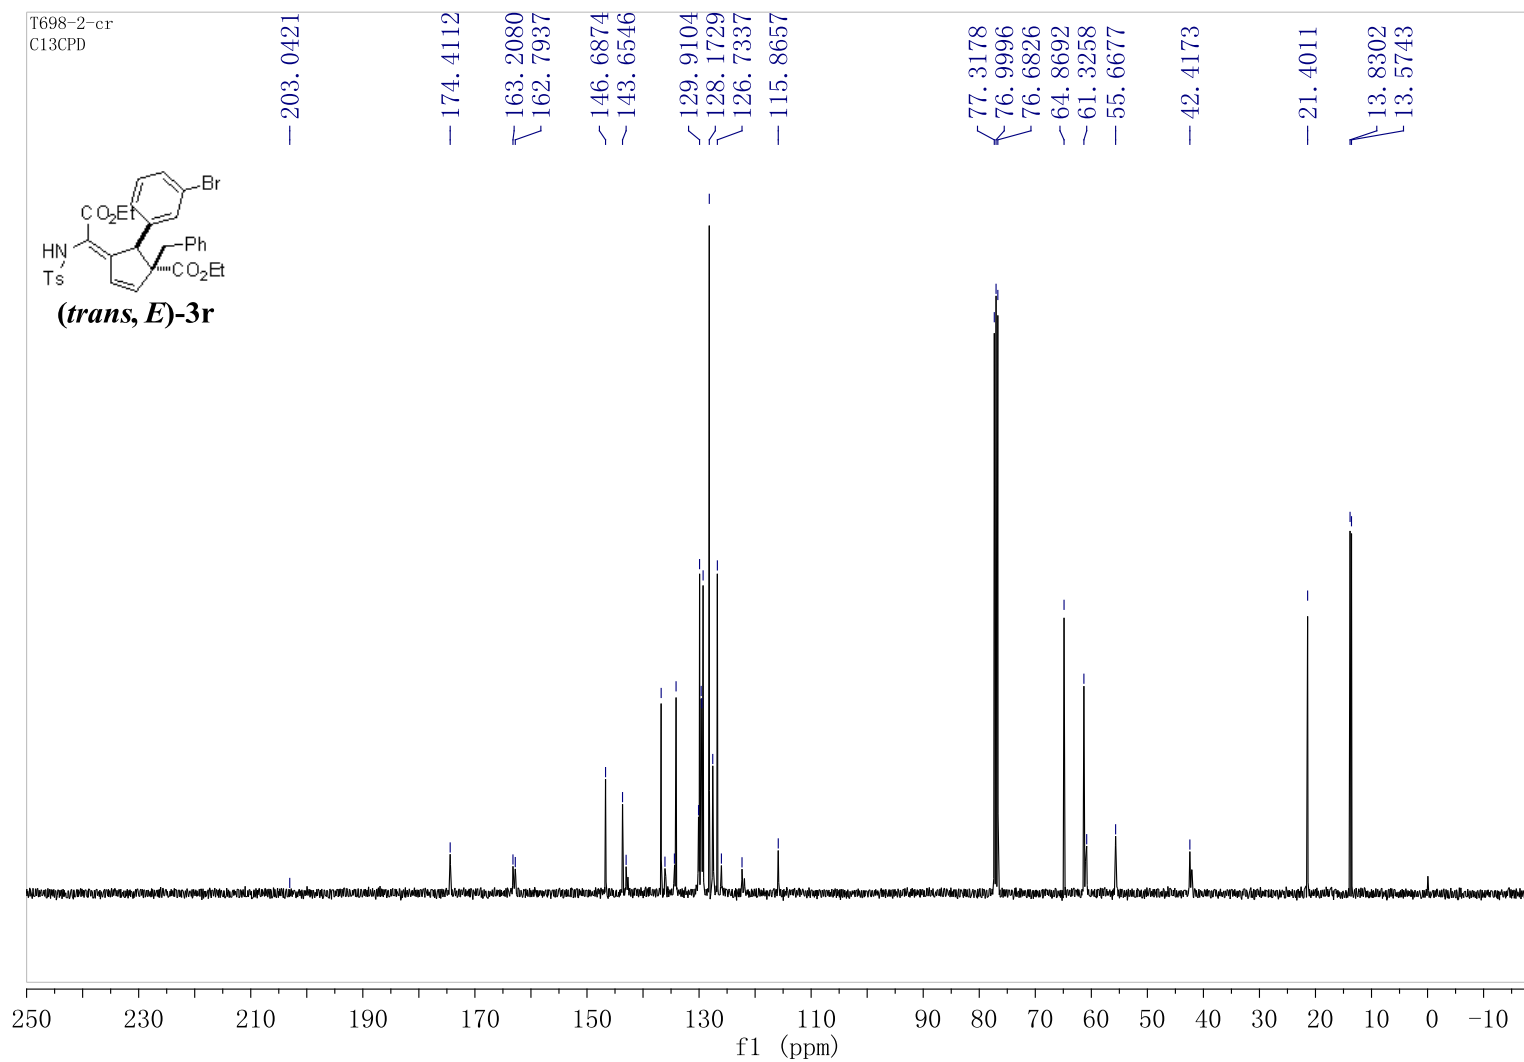

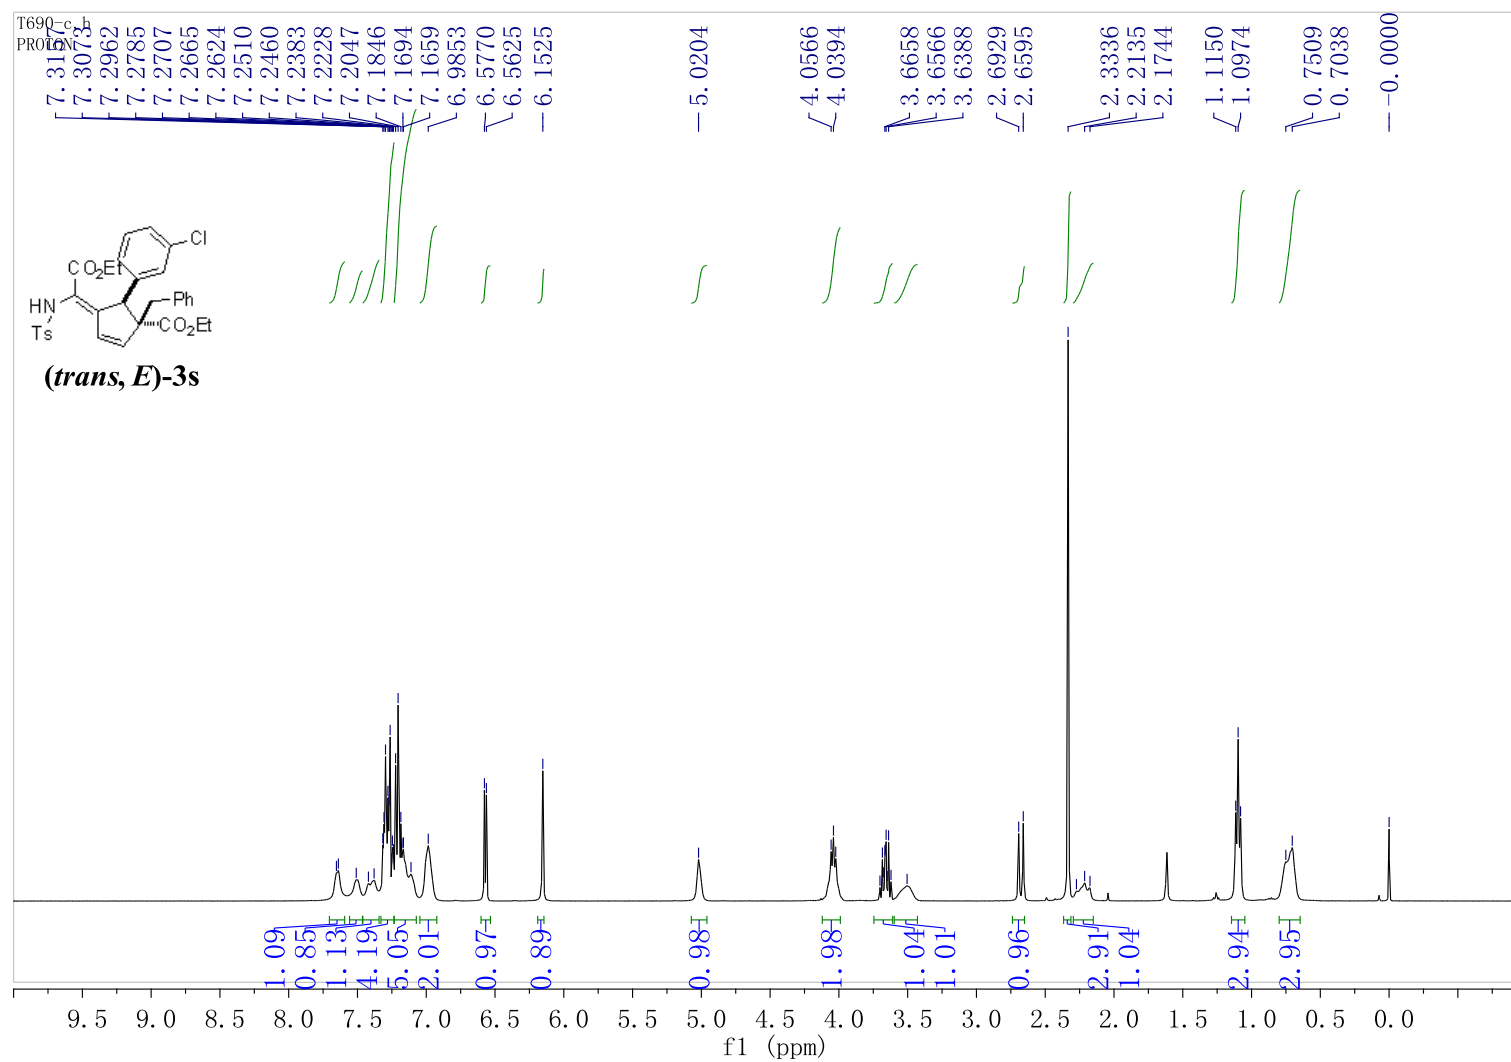

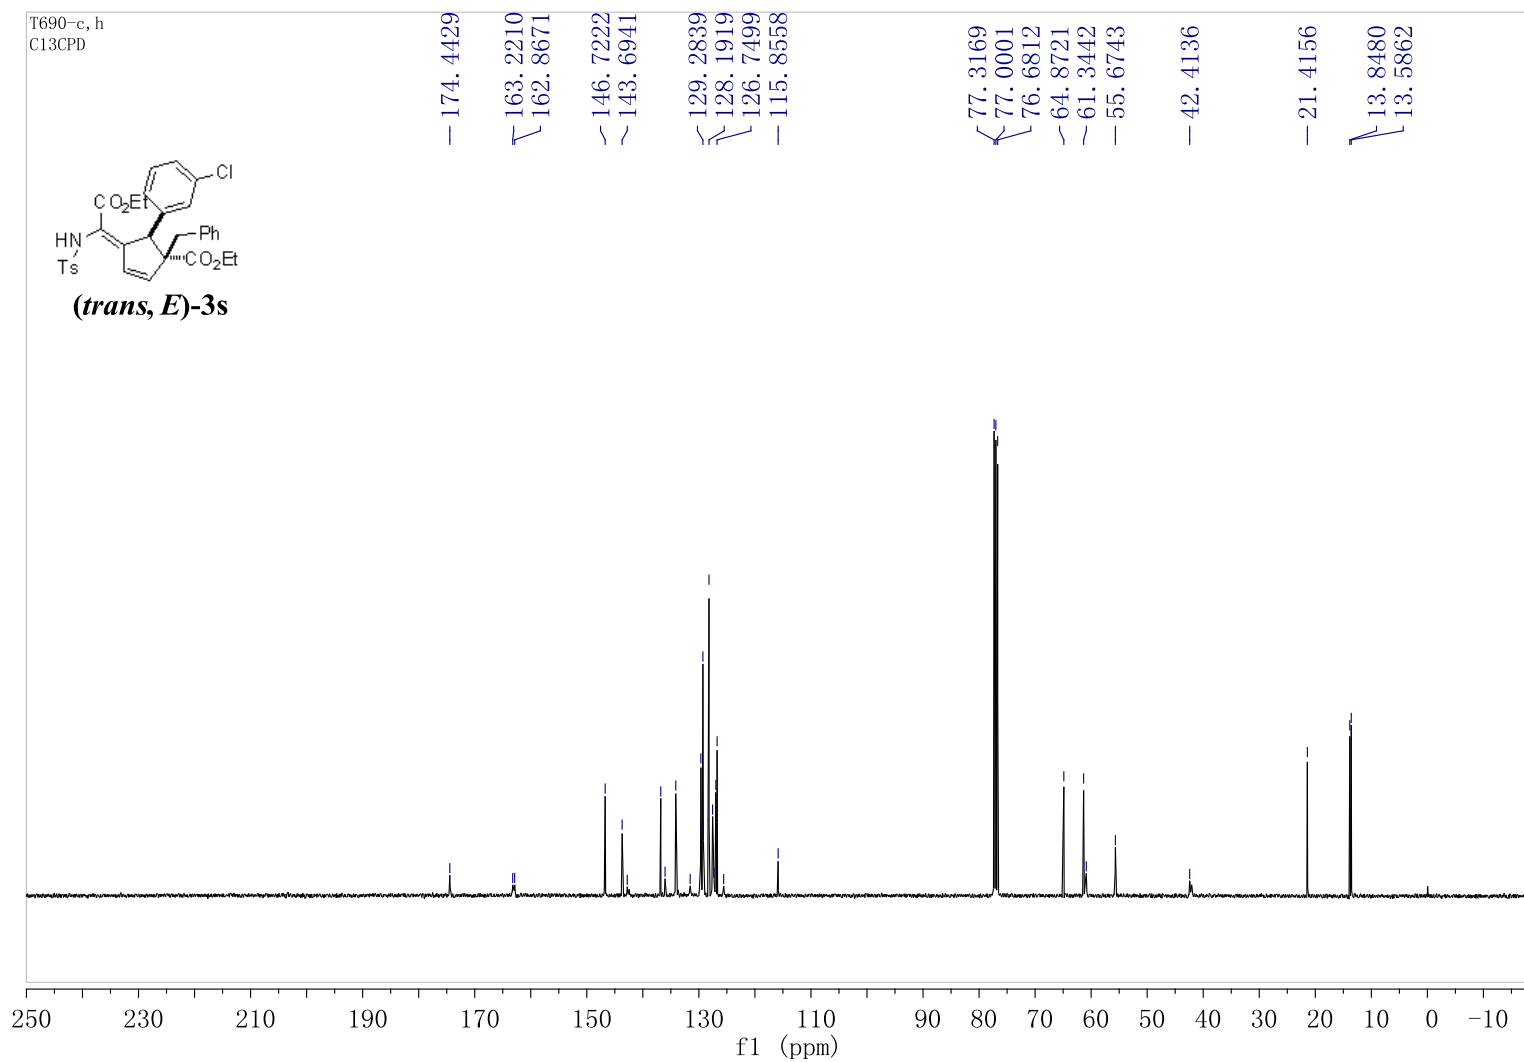

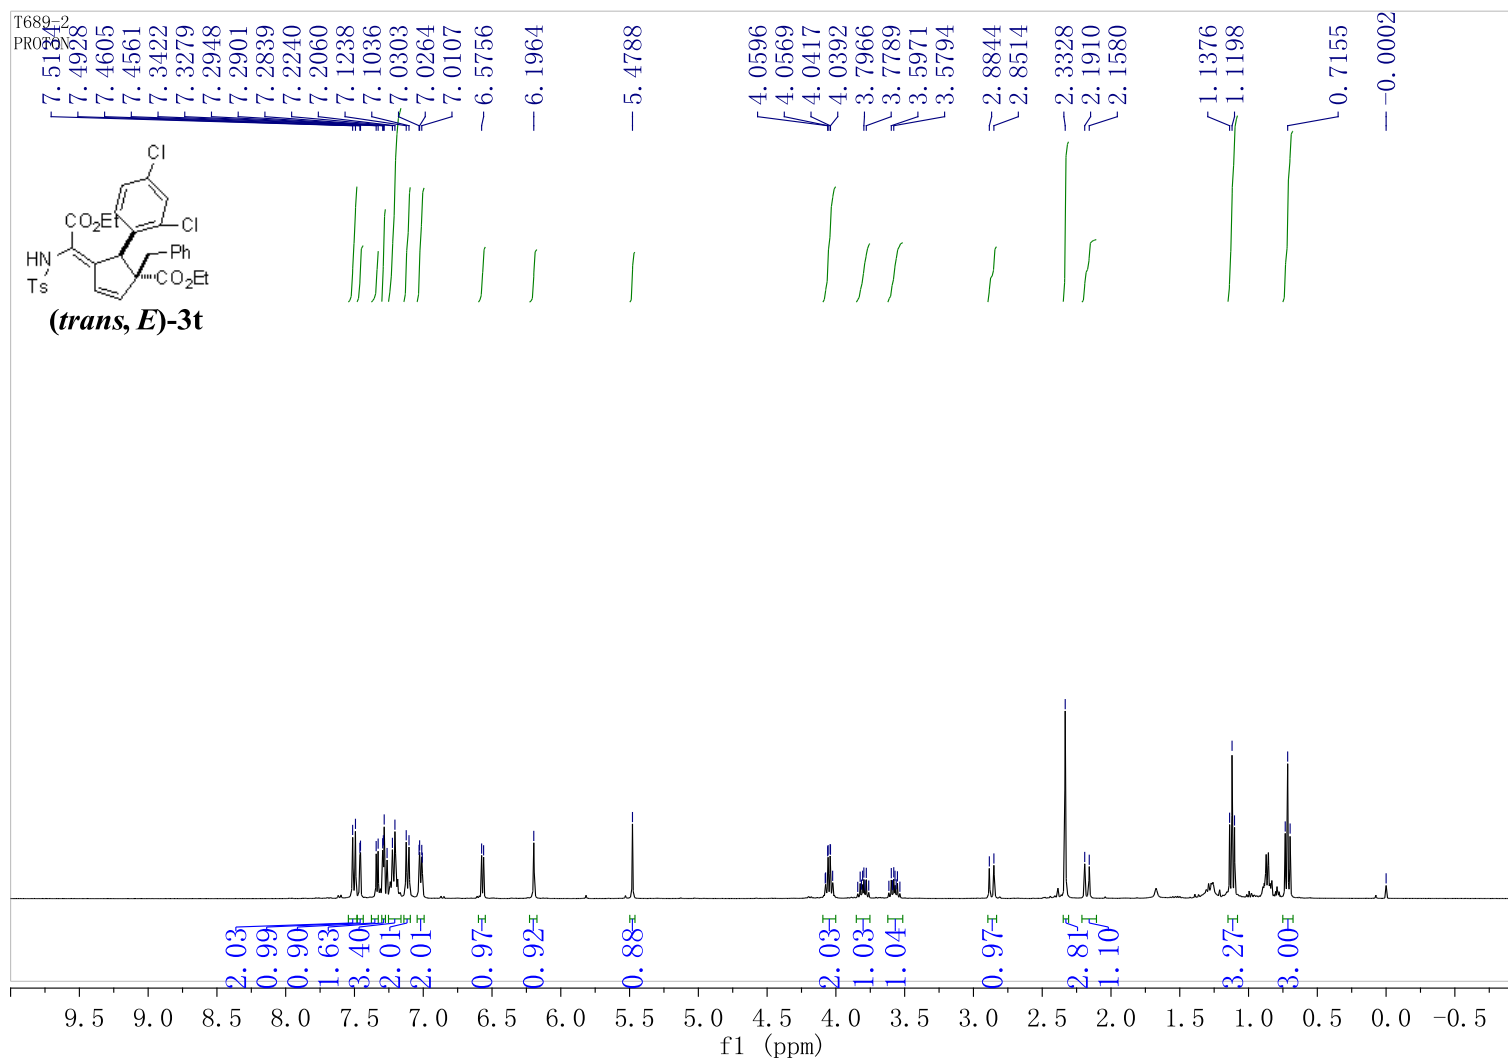

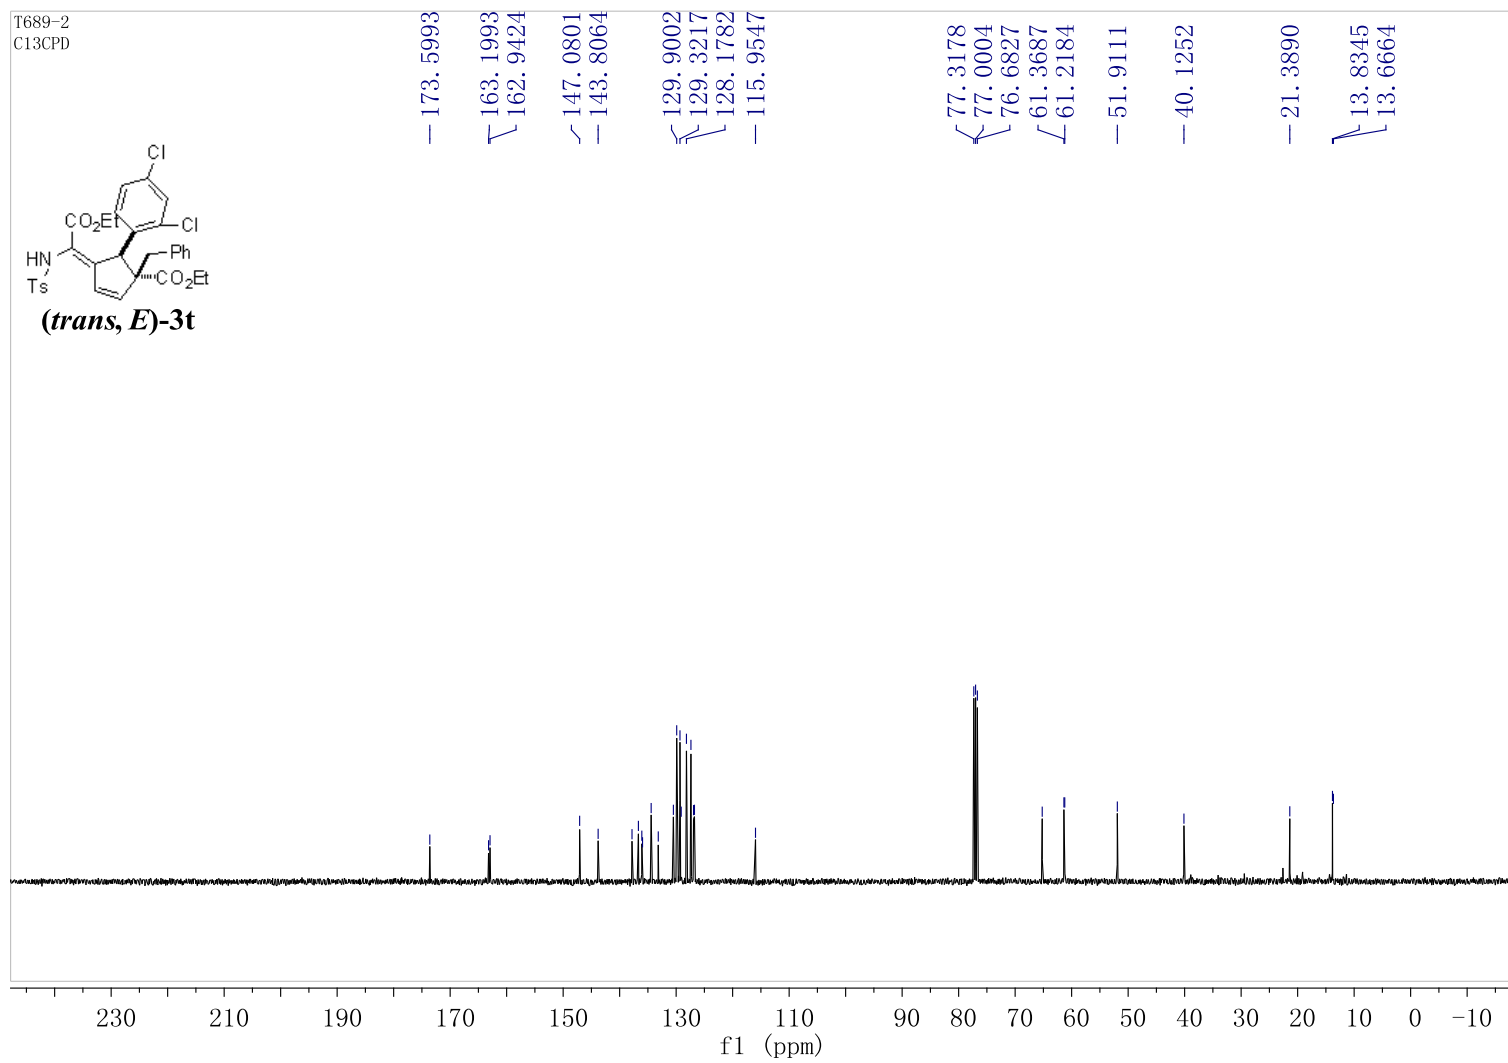

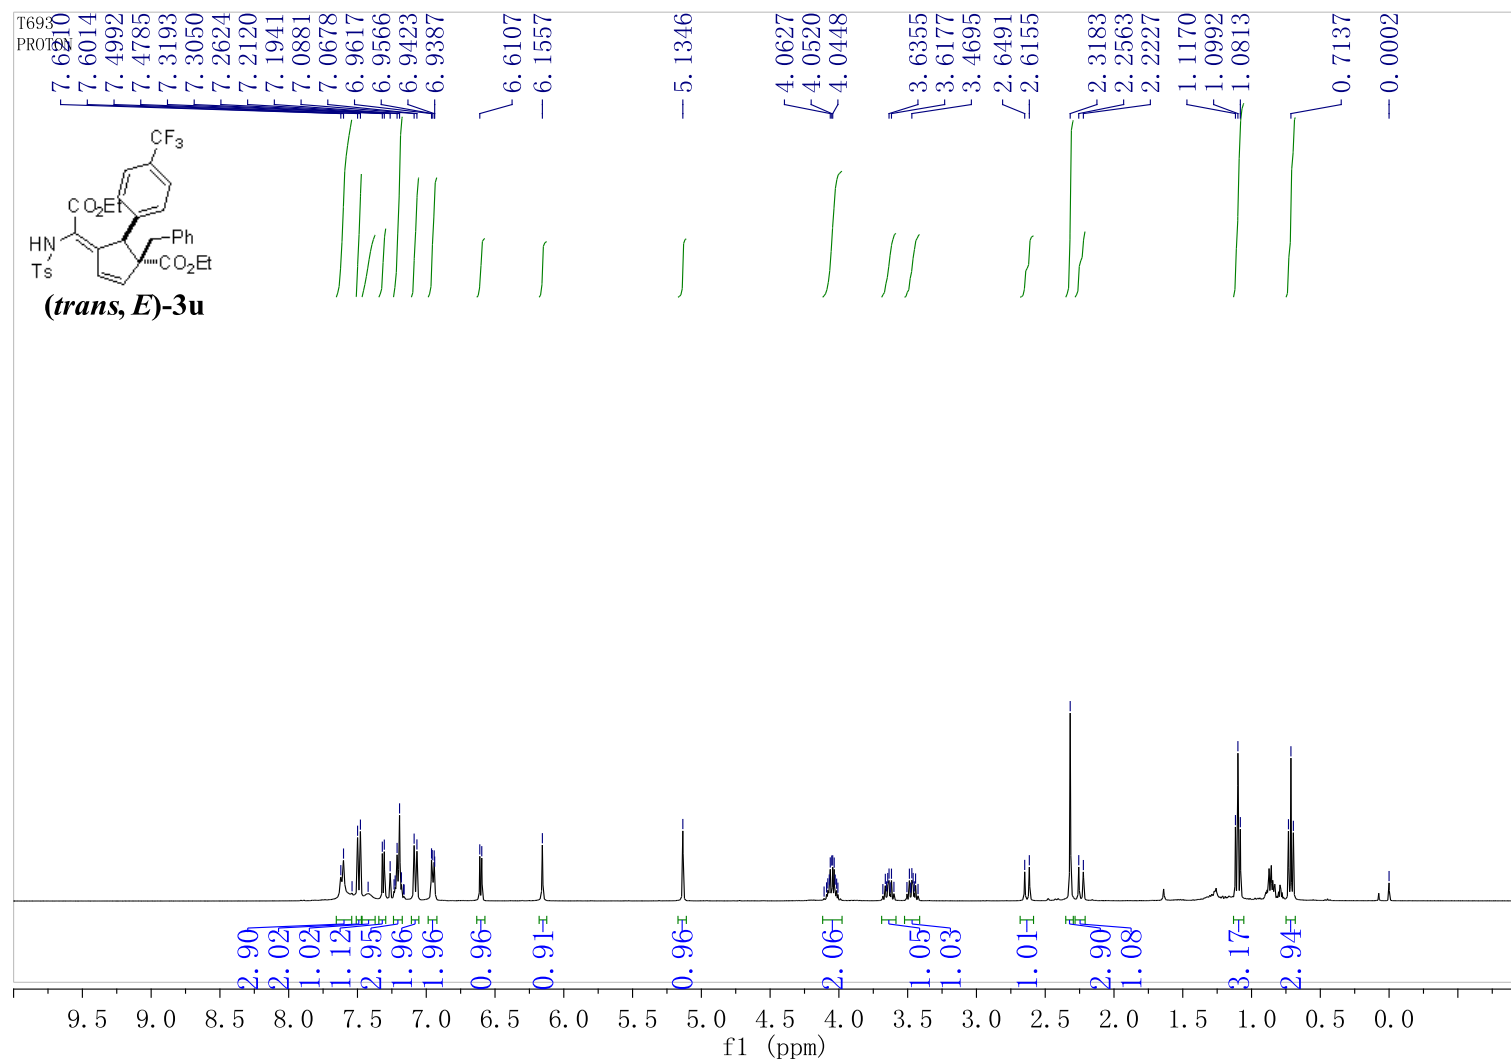



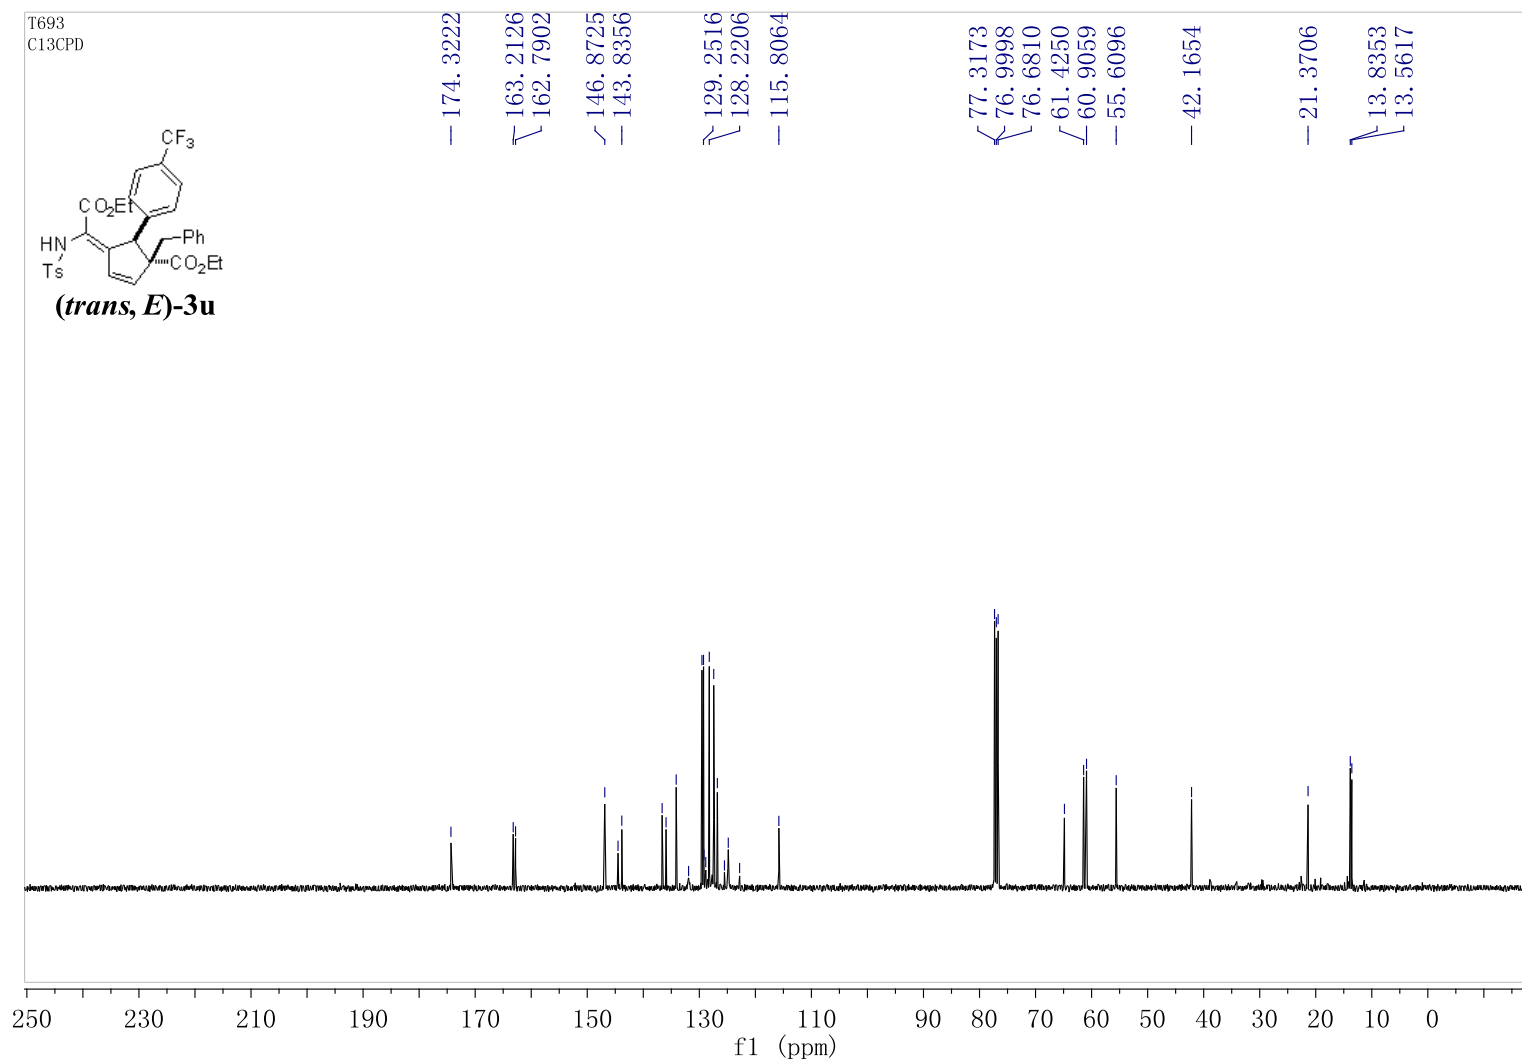

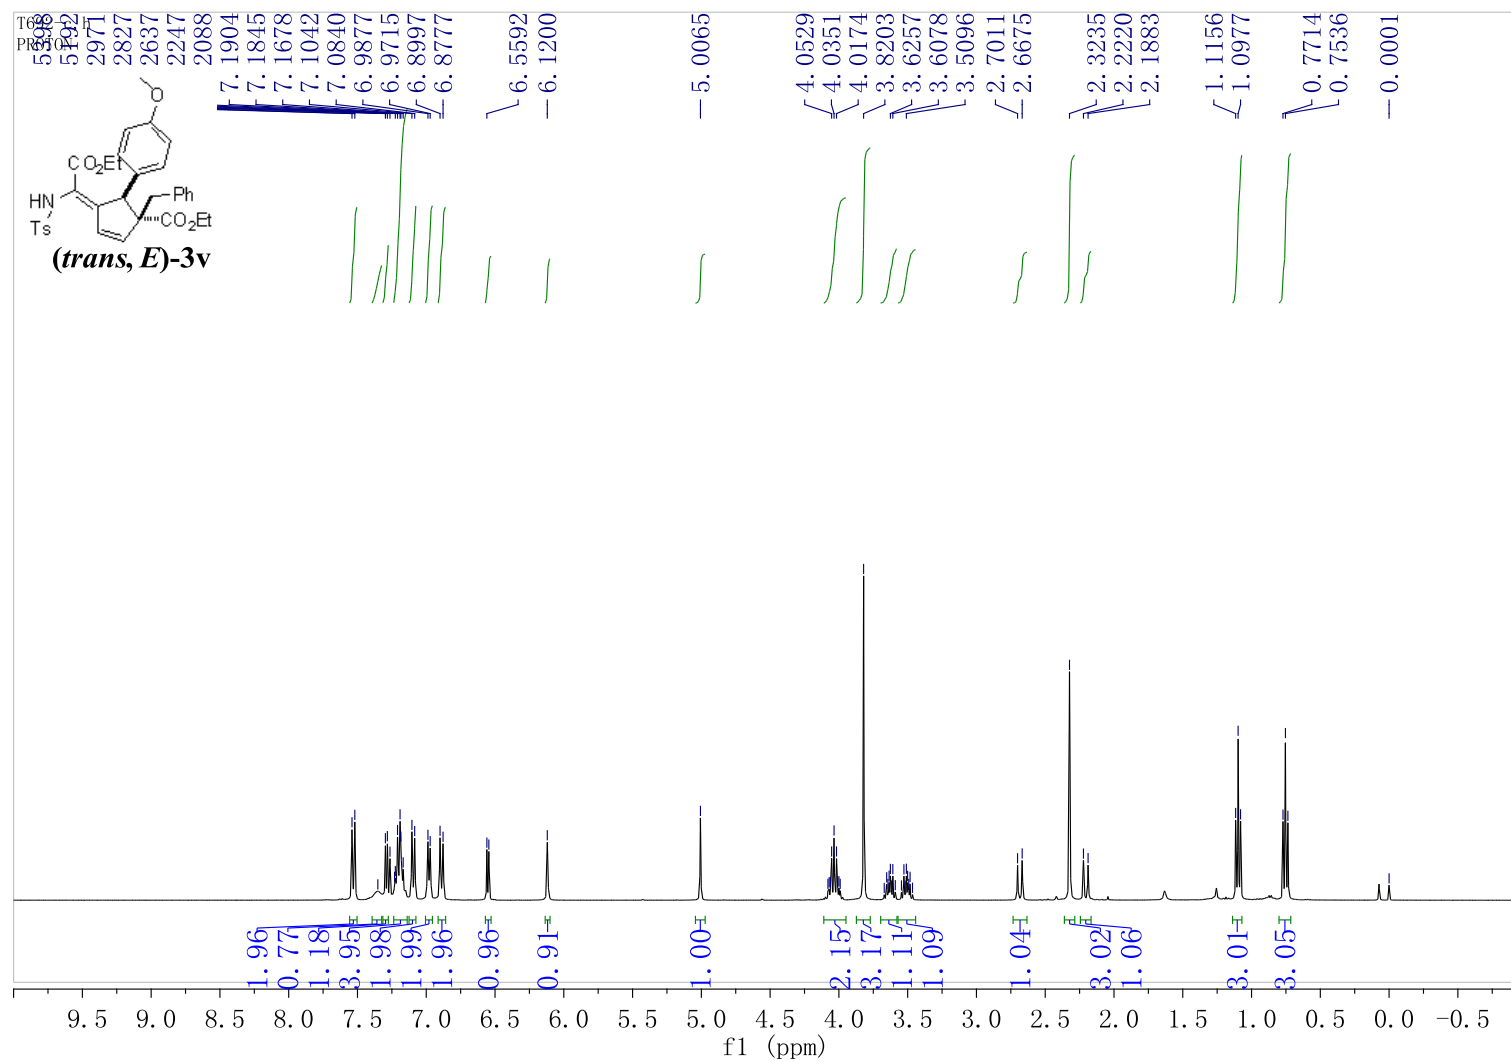

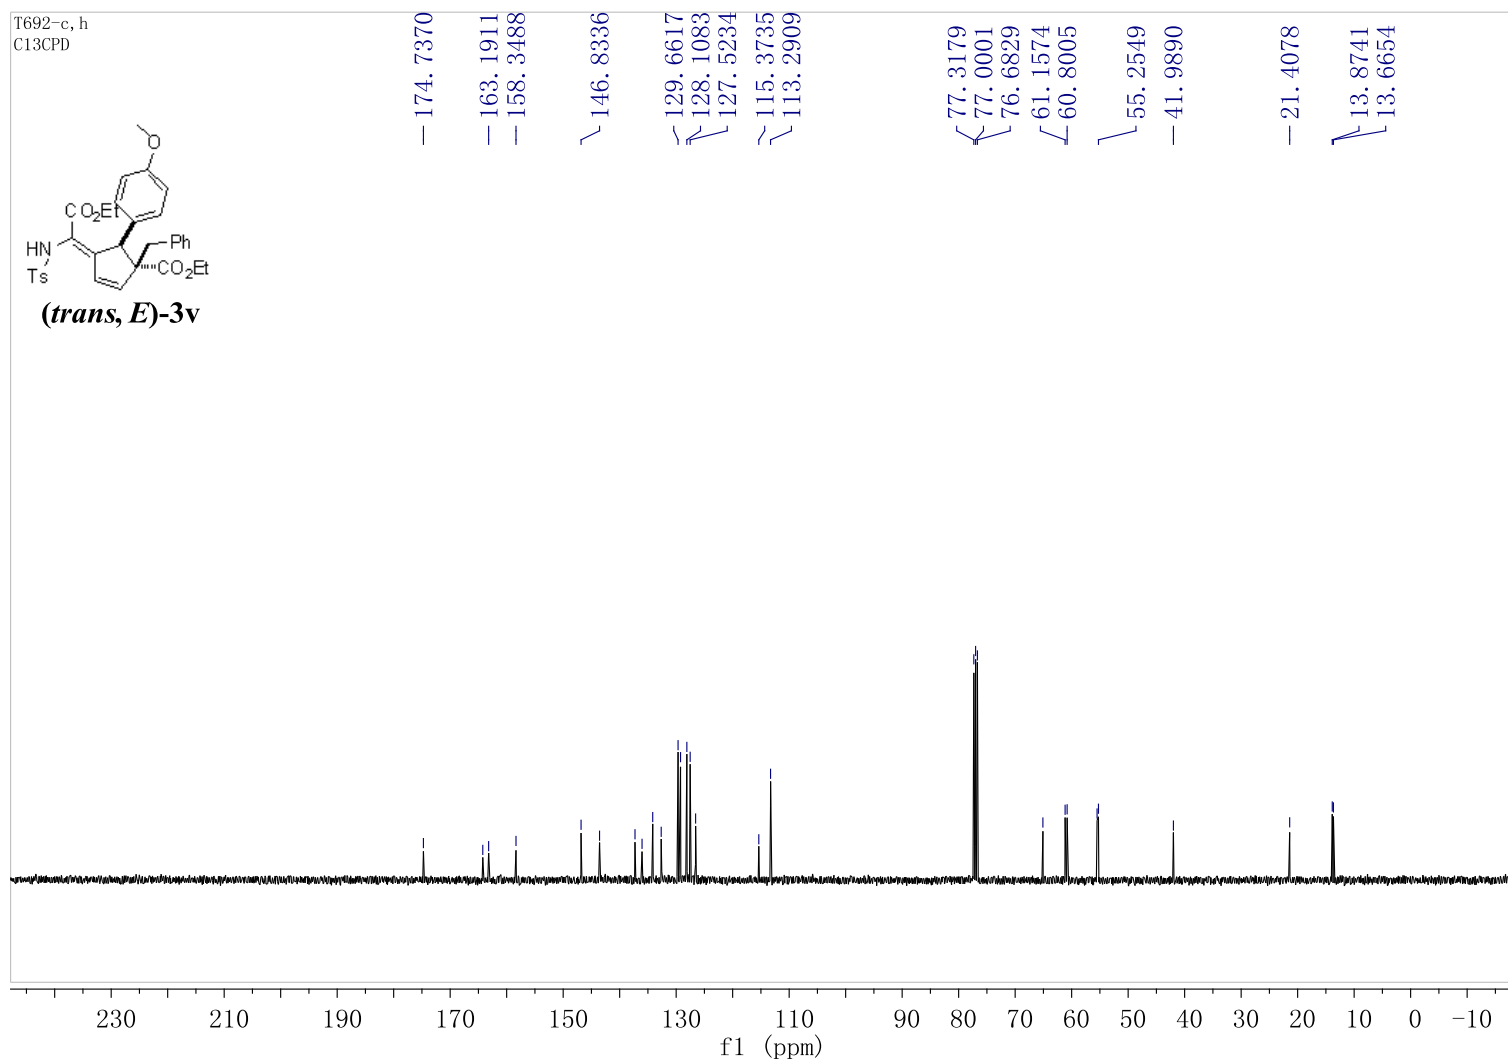

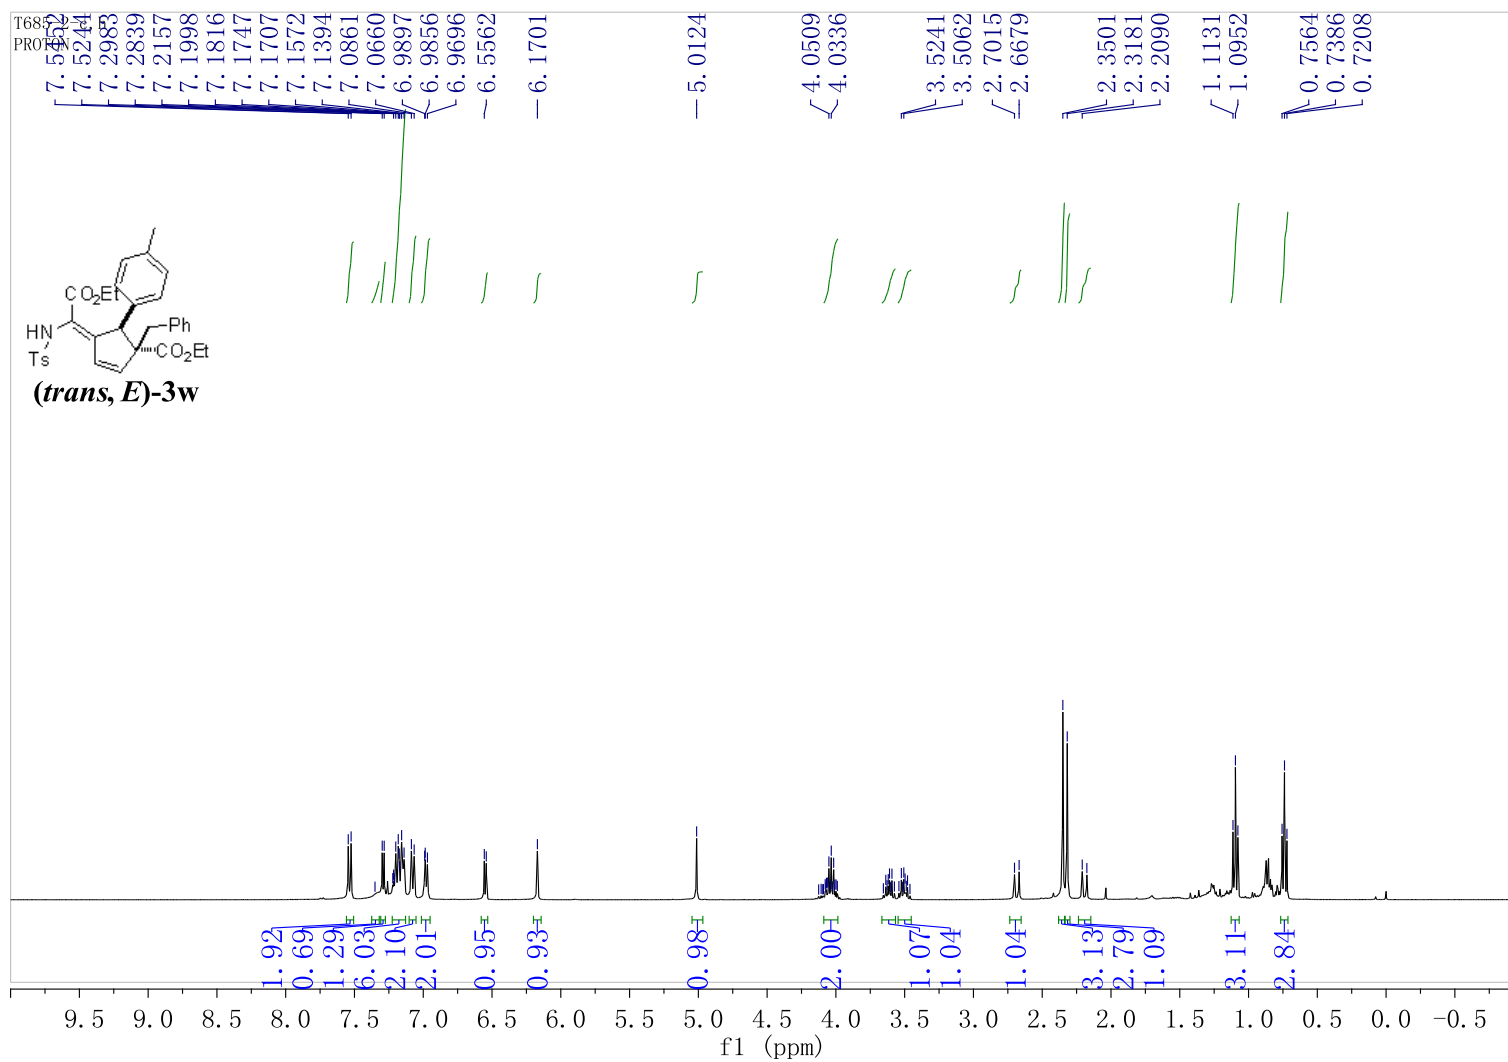

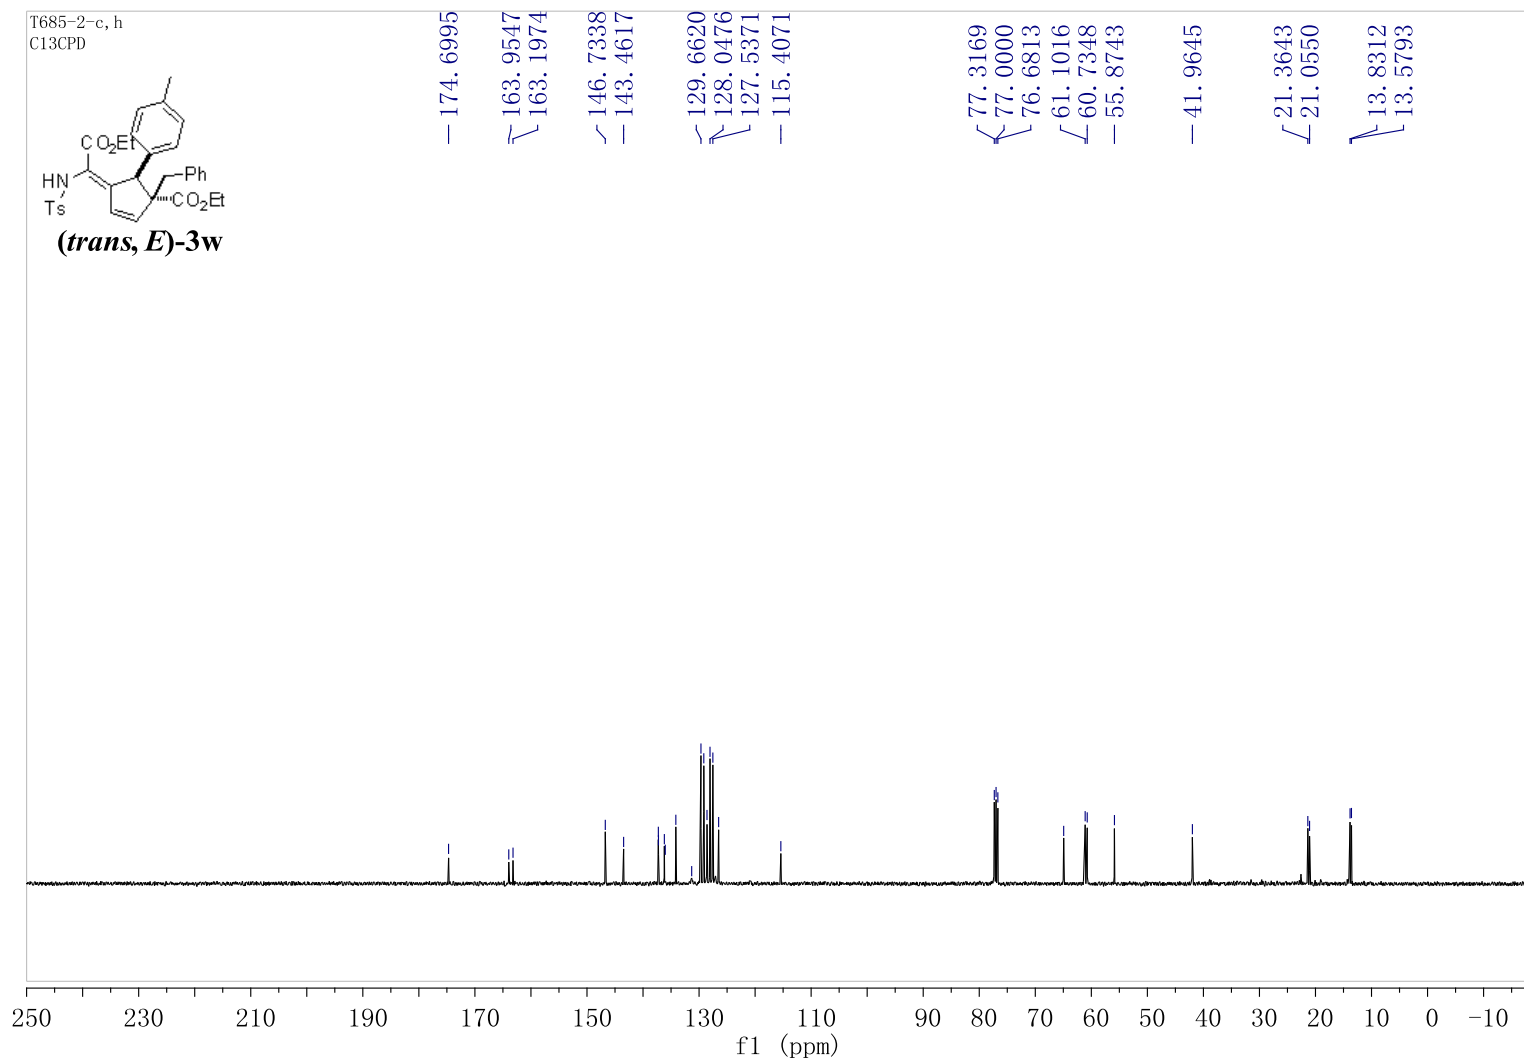

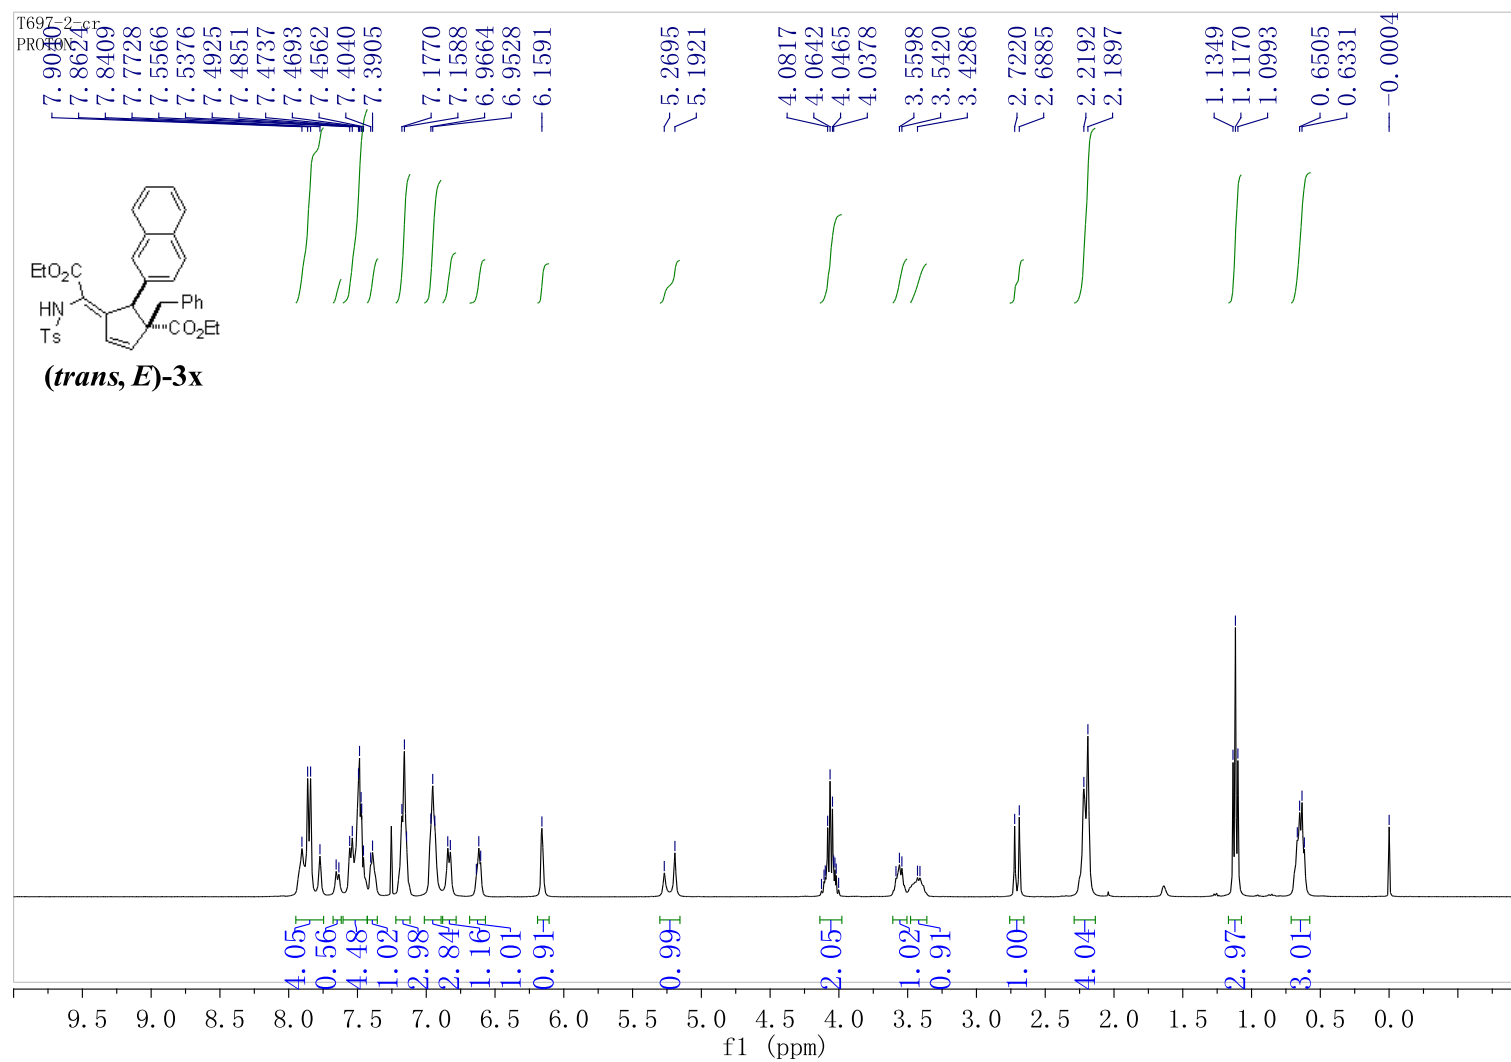

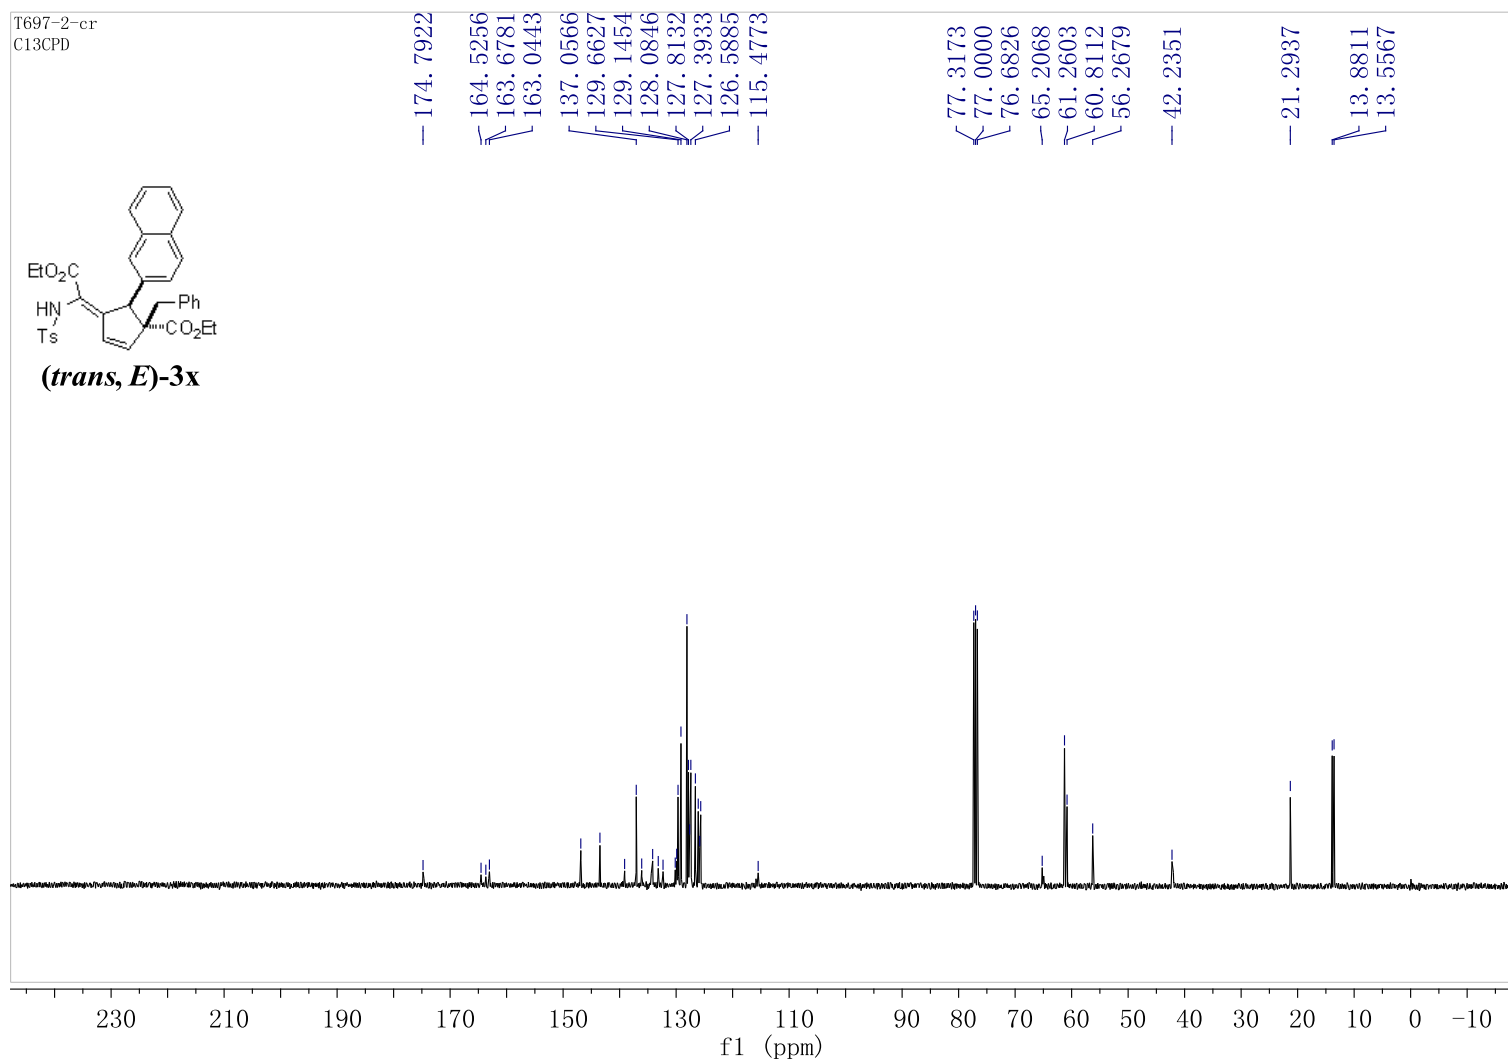

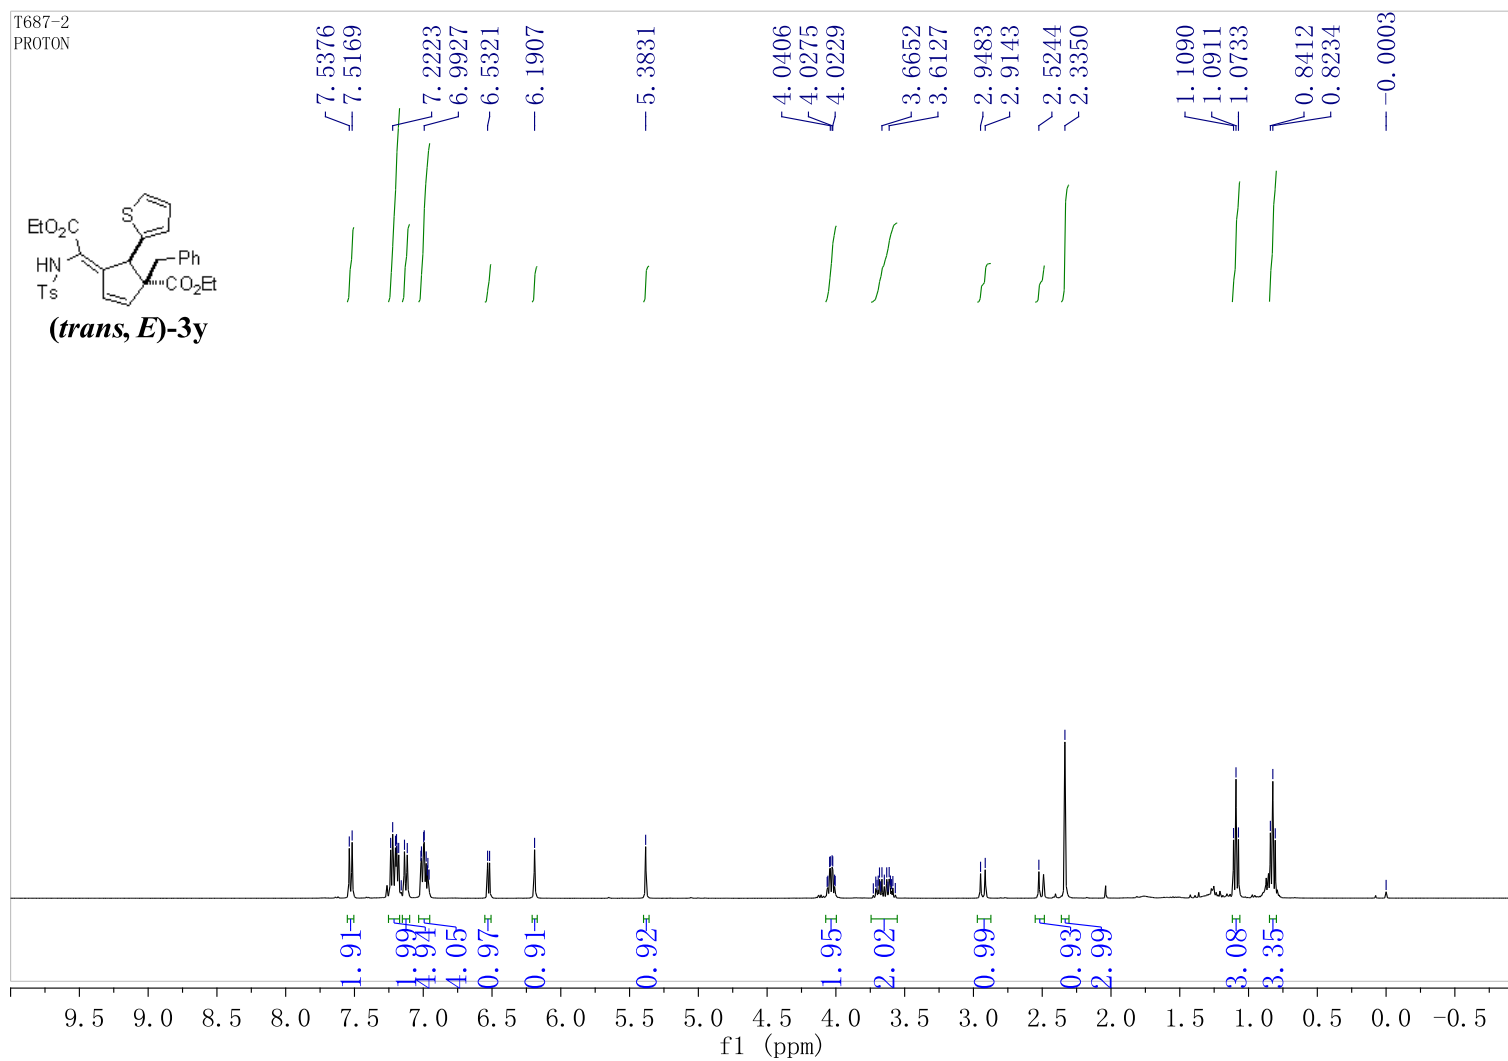



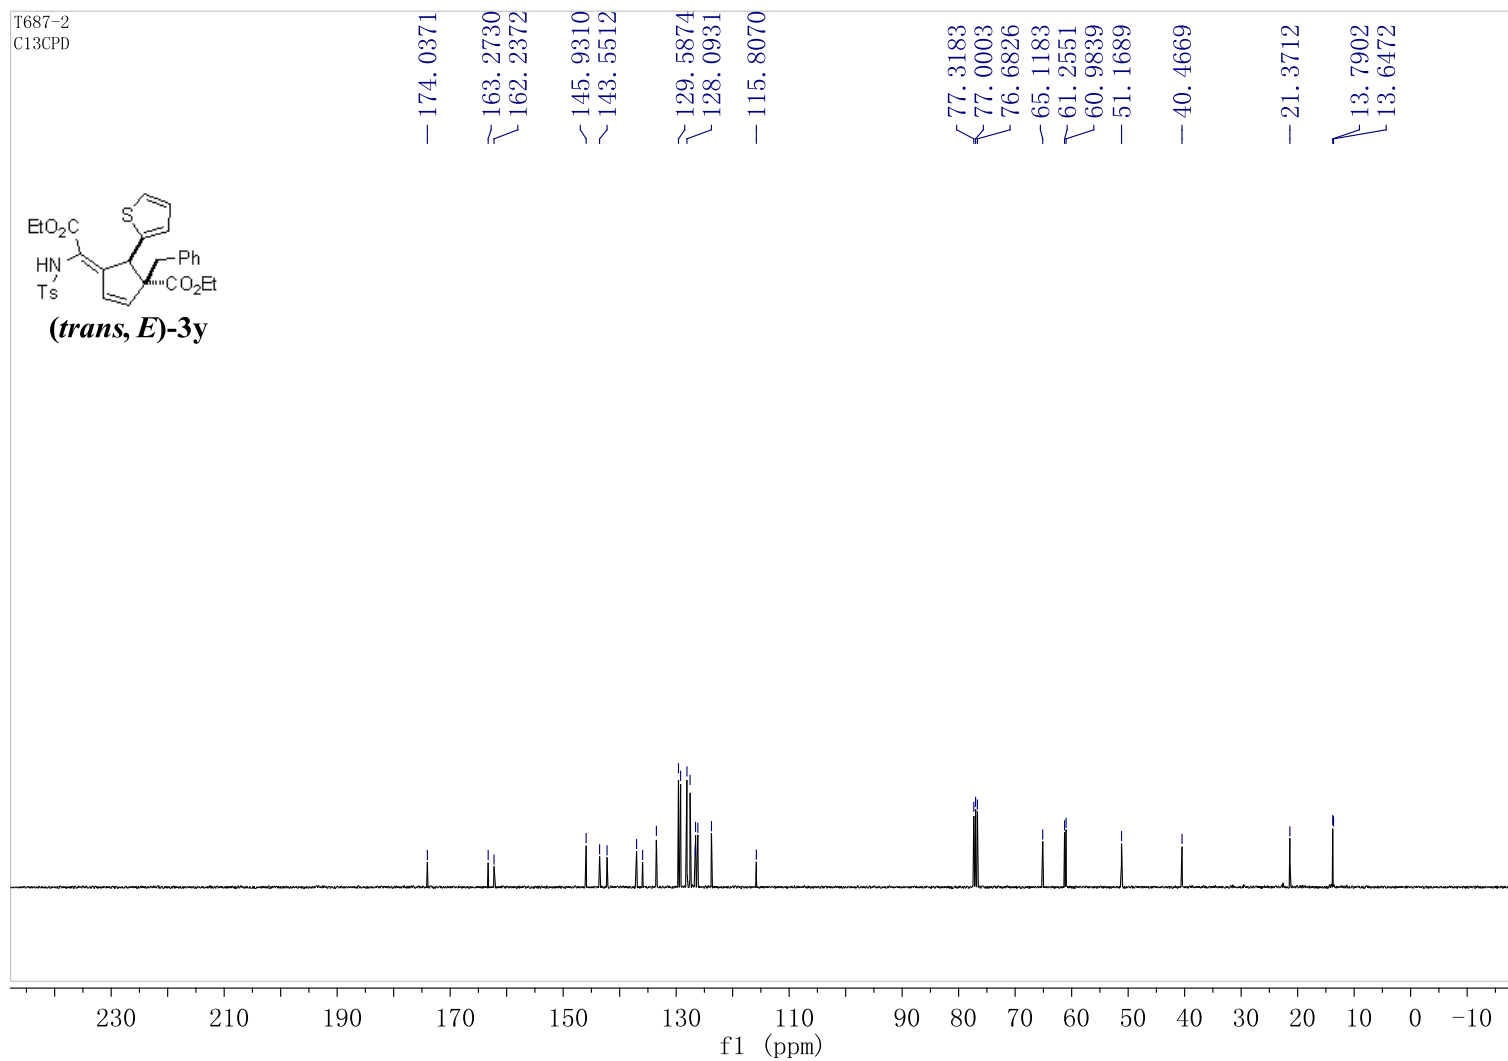

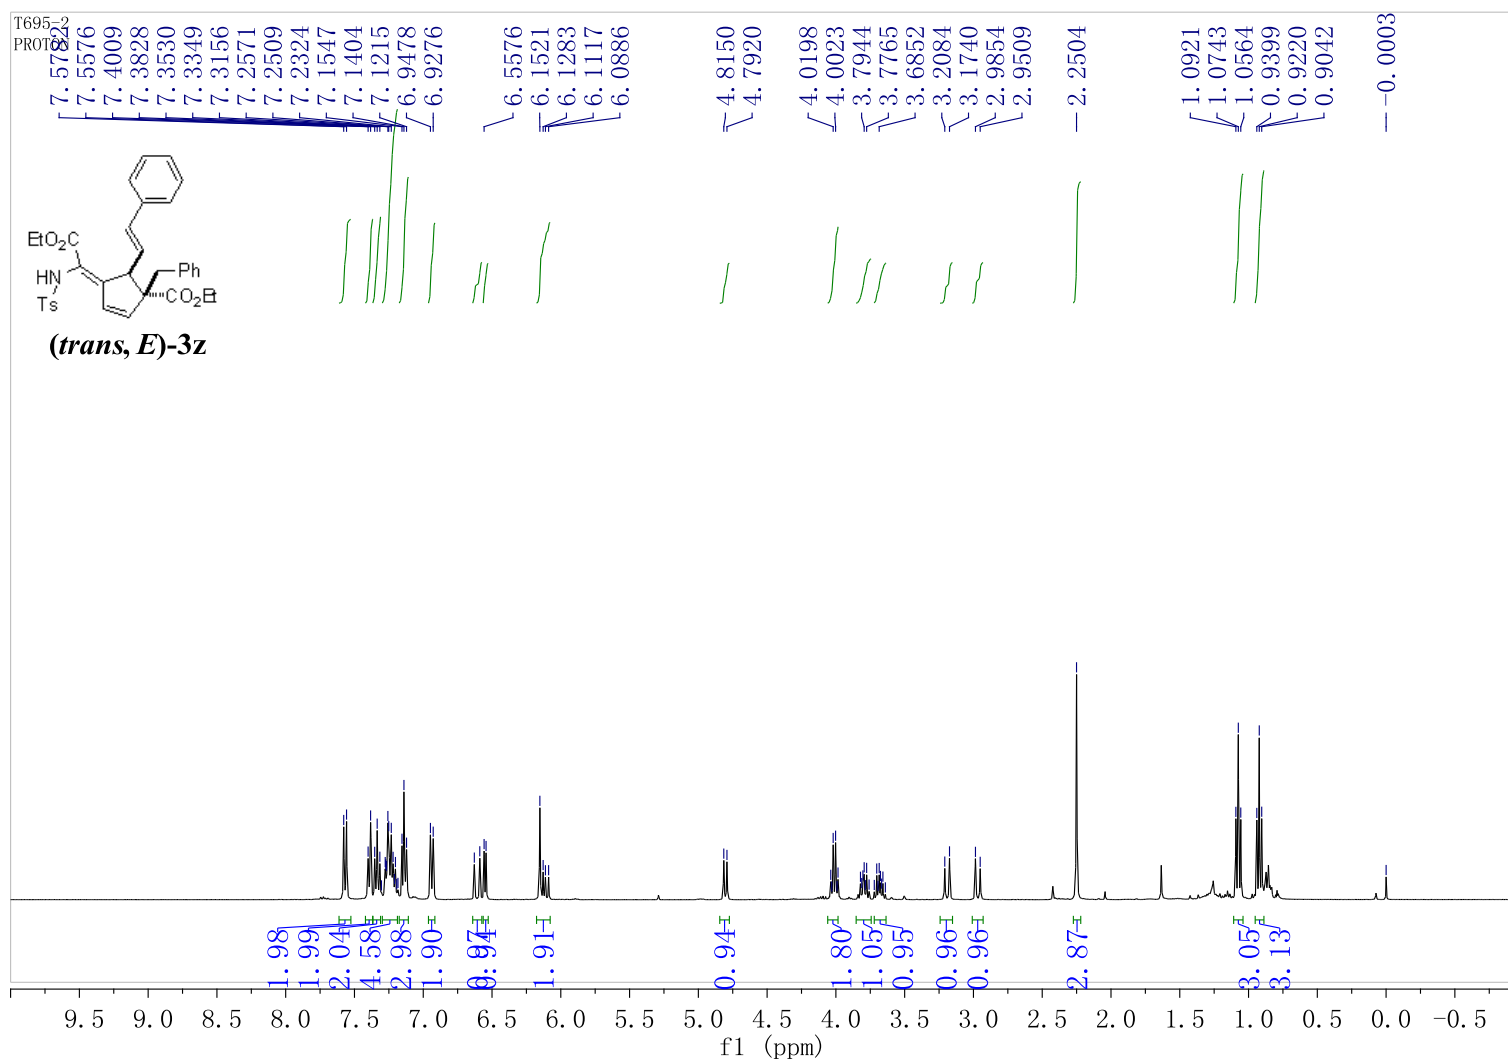

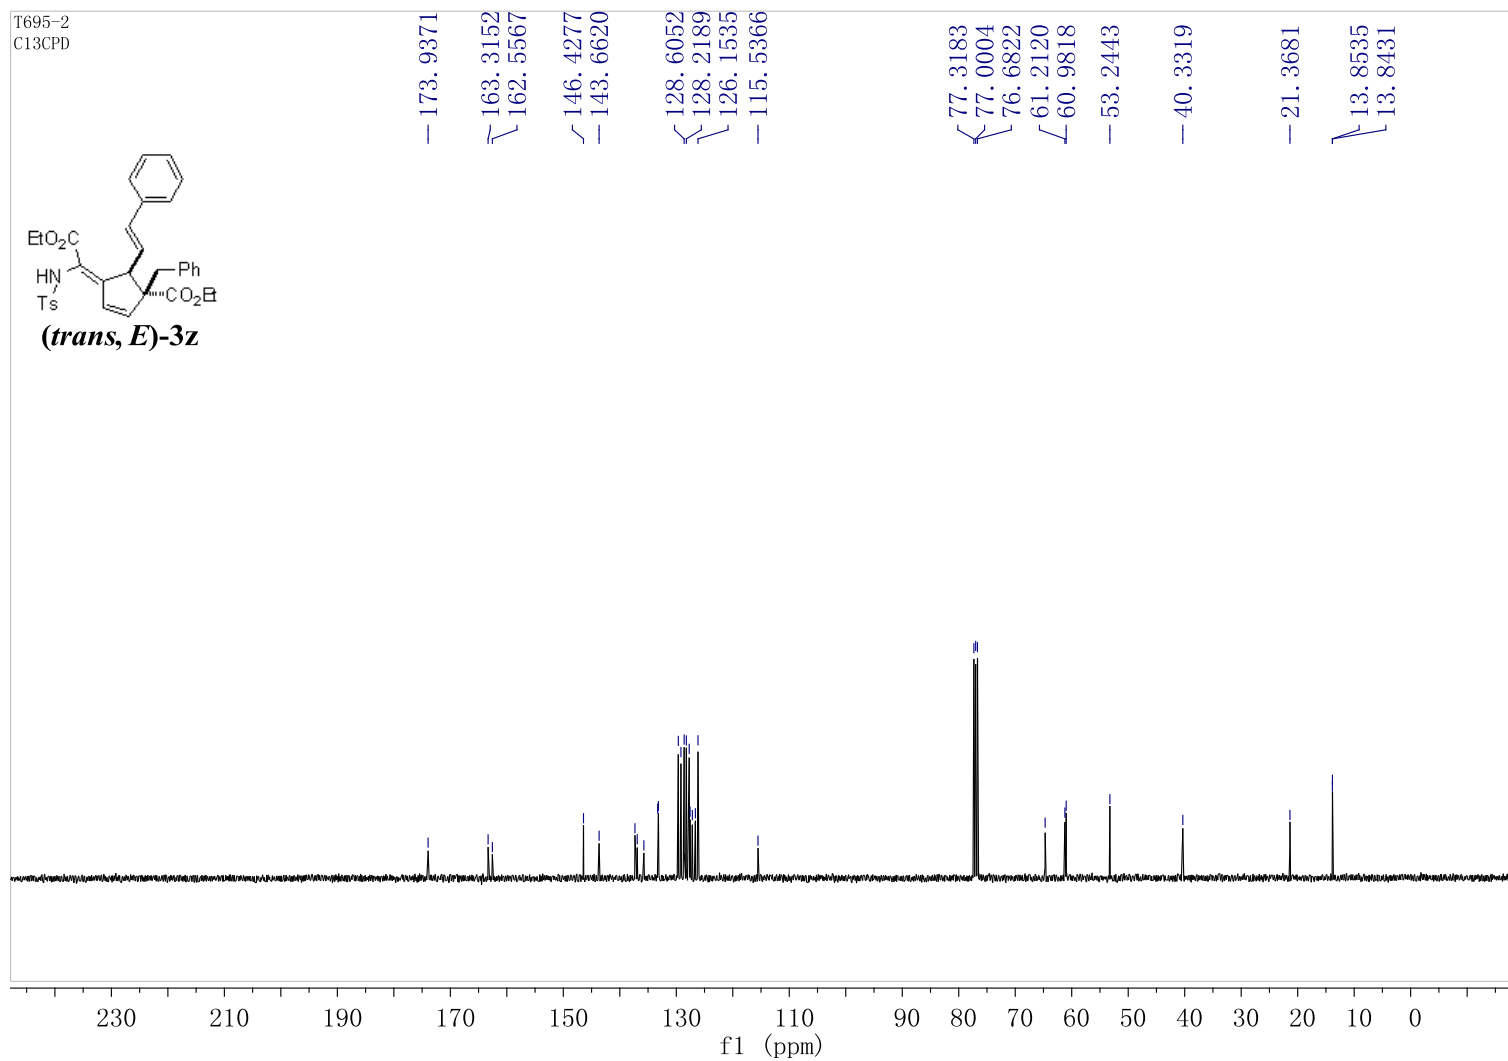

Supplement: c3cc38264h.pdf [file c3cc38264h.pdf]
